# Supplementary material
Source: Research Square preprint supplement (doi:10.21203/rs.3.rs-9030883/v1)
Supplement: Supplementary file 1 [file df5f210d47c6bb109f8644b1.xlsx]

## Sheet: 16S rRNA
Year	Isolate ID	Source	Species Match	% Identity	NCBI Reference Match	16S rRNA Nucleotide Sequence
2020	tur1	Winogradsky Column #1	Chryseobacterium sp.	95.24	MH671405.1	GGTAGCTACACATGCAAGCCGAGCGGTATTGTTTCTTCGGAAATGAGAGAGCGGCGTACGGGTGCGGAACACGTGTGCAACCTGCCTTTATCTGGGGGATAGCCTTTCGAAAGGGAGATTAATACCCCATAATATATTAAGTGGCATCACTTGATATTGAAAACTCCGGTGGATAGAGATGGGCACGCGCAAGATTAGATAGTTGGTGAGGTAACGGCTCACCAAGTCTACGATCTTTAGGGGGCCTGAGAGGGTGATCCCCCACACTGGTACTGAGACACGGACCAGACTCCTACGGGAGGCAGCAGTGAGGAATATTGGACAATGGGTGAGAGCCTGATCCAGCCATCCCGCGTGAAGGACGACGGCCCTATGGGTTGTAAACTTCTTTTGTATAGG…
	tur2	Winogradsky Column #1	Pseudomonas sp.	96.41	MF683391.1	GGATGACGGGAGCTTGCTCCTTGATTCAGCGGCGGACGGGTGAGTAATGCCTAGGAATCTGCCTGGTAGTGGGGGACAACGTTTCGAAAGGAACGCTAATACCGCATACGTCCTACGGGAGAAAGCAGGGGACCTTCGGGCCTTGCGCTATCAGATGAGCCTAGGTCGGATTAGCTAGTTGGTGAGGTAATGGCTCACCAAGGCGACGATCCGTAACTGGTCTGAGAGGATGATCAGTCACACTGGAACTGAGACACGGTCCAGACTCCTACGGGAGGCAGCAGTGGGGAATATTGGACAATGGGCGAAAGCCTGATCCAGCCATGCCGCGTGTGTGAAGAAGGTCTTCGGATTGTAAAGCACTTTAAGTTGGGAGGAAGGGCAGTAAGTTAATACCTT…
	tur3	Winogradsky Column #1	Pseudomonas sp.	96.89	MF800951.1	GGAGcCTACaCATGCaAGTCGAGCGGATGACGGGAGCTTGCTCCTTGATTCAGCGGCGGACGGGTGAGTAATGCCTAGGAATCTGCCTGGTAGTGGGGGACAACGTTTCGAAAGGAACGCTAATACCGCATACGTCCTACGGGAGAAAGCAGGGGACCTTCGGGCCTTGCGCTATCAGATGAGCCTAGGTCGGATTAGCTAGTTGGTGAGGTAATGGCTCACCAAGGCGACGATCCGTAACTGGTCTGAGAGGATGATCAGTCACACTGGAACTGAGACACGGTCCAGACTCCTACGGGAGGCAGCAGTGGGGAATATTGGACAATGGGCGAAAGCCTGATCCAGCCATGCCGCGTGTGTGAAGAAGGTCTTCGGATTGTAAAGCACTTTAAGTTGGGA…
	tur4	Winogradsky Column #1	Acinetobacter sp.	96.24	MH388771.1	GGAGAGAGGTAGCTTGCTACTGATCTTAGCGGCGGACGGGTGAGTAATGCTTAGGAATCTGCCTATTAGTGGGGGACAACATTTCGAAAGGAATGCTAATACCGCATACGTCCTACGGGAGAAAGCAGGGGATCTTCGGACCTTGCGCTAATAGATGAGCCTAAGTCGGATTAGCTAGTTGGTGGGGTAAAGGCCTACCAAGGCGACGATCTGTAGCGGGTCTGAGAGGATGATCCGCCACACTGGGACTGAGACACGGCCCAGACTCCTACGGGAGGCAGCAGTGGGGAATATTGGACAATGGGCGGAAGCCTGATCCAGCCATGCCGCGTGTGTGAAGAAGGCCTTATGGTTGTAAAGCACTTTAAGCGAGGAGGAGGCTACTCTAGTTAATACCTA…
	gin1	Winogradsky Column #1	Janthinobacterium sp.	95.95	NR_170541.1	GGCGCTGCCTTAACATGCAAGTCGAACGGCAGCACGGAGCTTGCTCTGGTGGCGAGTGGCGAACGGGTGAGTAATATATCGGAACGTACCCTGGAGTGGGGGATAACGTAGCGAAAGTTACGCTAATACCGCATACGATCTAAGGATGAAAGTGGGGGATCGCAAGACCTCATGCTCGTGGAGCGGCCGATATCTGATTAGCTAGTTGGTAGGGTAAAAGCCTACCAAGGCATCGATCAGTAGCTGGTCTGAGAGGACGACCAGCCACACTGGAACTGAGACACGGTCCAGACTCCTACGGGAGGCAGCAGTGGGGAATTTTGGACAATGGGCGAAAGCCTGATCCAGCAATGCCGCGTGAGTGAAGAAGGCCTTCGGGTTGTAAAGCTCTTTTGTCAG…
	gin2	Winogradsky Column #1	Chryseobacterium sp.	96.97	PQ459540.1	GGAGCTACACATGCAGCCGAGCGGTATTTGTTCTTCGGAACAGAGAGAGCGGCGTACGGGTGCGGAACACGTGTGCAACCTGCCTTTATCAGGGAGATAGCCTTTCGAAAGGAAGATTAATATCCCATAATATATTAAGTGGCATCACTTGATATTGAAAGCTCCGGCGGATAAAGATGGGCACGCGCAAGATTAGATAGTTGGTAGGGTAACGGCCTACCAAGTCAGTGATCTTTAGGGGGCCTGAGAGGGTGATCCCCCACACTGGTACTGAGACACGGACCAGACTCCTACGGGAGGCAGCAGTGAGGAATATTGGACAATGGGTGAGAGCCTGATCCAGCCATCCCGCGTGAAGGACGACGGCCCTATGGGTTGTAAACTTCTTTTGTATAGGGA…
	gin3	Winogradsky Column #1	Chryseobacterium sp.	97.22	MF872591.1	GGTATTGTTTCTTCGGAAATGAGAGAGCGGCGTACGGGTGCGGAACACGTGTGCAACCTGCCTTTATCTGGGGGATAGCCTTTCGAAAGGGAGATTAATACCCCATAATATATTAAGTGGCATCACTTGATATTGAAAACTCCGGTGGATAGAGATGGGCACGCGCAAGATTAGATAGTTGGTGAGGTAACGGCTCACCAAGTCTACGATCTTTAGGGGGCCTGAGAGGGTGATCCCCCACACTGGTACTGAGACACGGACCAGACTCCTACGGGAGGCAGCAGTGAGGAATATTGGACAATGGGTGAGAGCCTGATCCAGCCATCCCGCGTGAAGGACGACGGCCCTATGGGTTGTAAACTTCTTTTGTATAGGGATAAACCTACTCTCGTGAGAGTA…
	gin4	Winogradsky Column #1	Acinetobacter sp.	95.99	MH388771.1	GGCCGTGCGGCGGCTTACACATGCAAGTCGAGCGGAGAGAGGTAGCTTGCTACTGATCTTAGCGGCGGACGGGTGAGTAATGCTTAGGAATCTGCCTATTAGTGGGGGACAACATTTCGAAAGGAATGCTAATACCGCATACGTCCTACGGGAGAAAGCAGGGGATCTTCGGACCTTGCGCTAATAGATGAGCCTAAGTCGGATTAGCTAGTTGGTGGGGTAAAGGCCTACCAAGGCGACGATCTGTAGCGGGTCTGAGAGGATGATCCGCCACACTGGGACTGAGACACGGCCCAGACTCCTACGGGAGGCAGCAGTGGGGAATATTGGACAATGGGCGGAAGCCTGATCCAGCCATGCCGCGTGTGTGAAGAAGGCCTTATGGTTGTAAAGCACTTT…
	gin5	Winogradsky Column #1	Brevundimonas sp.	99.03	MW407015.1	GGAGTTAGTGGCGGACGGGTGAGTAACACGTGGGAACGTGCCTTTAGGTTCGGAATAACTCAGGGAAACTTGTGCTAATACCGAATGTGCCCTTCGGGGGAAAGATTTATCGCCTTTAGAGCGGCCCGCGTCTGATTAGCTAGTTGGTGAGGTAAAGGCTCACCAAGGCGACGATCAGTAGCTGGTCTGAGAGGATGATCAGCCACATTGGGACTGAGACACGGCCCAAACTCCTACGGGAGGCAGCAGTGGGGAATCTTGCGCAATGGGCGAAAGCCTGACGCAGCCATGCCGCGTGAATGATGAAGGTCTTAGGATTGTAAAATTCTTTCACCGGGGACGATAATGACGGTACCCGGAGAAGAAGCCCCGGCTAACTTCGTGCCAGCAGCCGCGGTA…
	gin6	Winogradsky Column #1	Bacillus sp.	97.73	MH569380.1	GCAGTCGAGCGAATGGATTGAGAGCTTGCTCTCATGAAGTTAGCGGCGGACGGGTGAGTAACACGTGGGTAACCTGCCCATAAGACTGGGATAACTCCGGGAAACCGGGGCTAATACCGGATAATATTTTGAACTGCATGGTTCGAAATTGAAAGGCGGCTTCGGCTGTCACTTATGGATGGACCCGCGTCGCATTAGCTAGTTGGTGAGGTAACGGCTCACCAAGGCAACGATGCGTAGCCGACCTGAGAGGGTGATCGGCCACACTGGGACTGAGACACGGCCCAGACTCCTACGGGAGGCAGCAGTAGGGAATCTTCCGCAATGGACGAAAGTCTGACGGAGCAACGCCGCGTGAGTGATGAAGGCTTTCGGGTCGTAAAACTCTGTTGTTAGGGA…
	gin7	Winogradsky Column #1	Chryseobacterium sp.	99.31	MH671405.1	GGTATTGTTTCTTCGGAAATGAGAGAGCGGCGTACGGGTGCGGAACACGTGTGCAACCTGCCTTTATCTGGGGGATAGCCTTTCGAAAGGGAGATTAATACCCCATAATATATTAAGTGGCATCACTTGATATTGAAAACTCCGGTGGATAGAGATGGGCACGCGCAAGATTAGATAGTTGGTGAGGTAACGGCTCACCAAGTCTACGATCTTTAGGGGGCCTGAGAGGGTGATCCCCCACACTGGTACTGAGACACGGACCAGACTCCTACGGGAGGCAGCAGTGAGGAATATTGGACAATGGGTGAGAGCCTGATCCAGCCATCCCGCGTGAAGGACGACGGCCCTATGGGTTGTAAACTTCTTTTGTATAGGGATAAACCTACTCTCGTGAGAGTA…
	gin8	Winogradsky Column #1	Pseudomonas sp.	98.14	PV652527.1	GGCAGCACGGGTACTTGTACCTGGTGGCGAGCGGCGGACNNNTNAGTAATGCCTAGGAATCTGCCTAGTAGTGGGGGATAACGTCCGGAAACGGGCGCTAATACCGCATACGTCCTACGGGAGAAAGTGGGGGATCTTCGGACCTCACGCTATTAGATGAGCCTAGGTCGGATTAGCTAGTTGGTGAGGTAATGGCTCACCAAGGCGACGATCCGTAACTGGTCTGAGAGGATGATCAGTCACACTGGAACTGAGACACGGTCCAGACTCCTACGGGAGGCAGCAGTGGGGAATATTGGACAATGGGCGAAAGCCTGATCCAGCCATGCCGCGTGTGTGAAGAAGGTCTTCGGATTGTAAAGCACTTTAAGTTGGGAGGAAGGGCAGTTACCTAATACG…
	gin9	Winogradsky Column #1	Chryseobacterium sp.	96.22	MH671405.1	GGAGCTAaCaCATGCAAGCCGAGCGGTATTGTTTCTTCGGAAATGAGAGAGCGGCGTACGGGTGCGGAACACGTGTGCAACCTGCCTTTATCTGGGGGATAGCCTTTCGAAAGGGAGATTAATACCCCATAATATATTAAGTGGCATCACTTGATATTGAAAACTCCGGTGGATAGAGATGGGCACGCGCAAGATTAGATAGTTGGTGAGGTAACGGCTCACCAAGTCTACGATCTTTAGGGGGCCTGAGAGGGTGATCCCCCACACTGGTACTGAGACACGGACCAGACTCCTACGGGAGGCAGCAGTGAGGAATATTGGACAATGGGTGAGAGCCTGATCCAGCCATCCCGCGTGAAGGACGACGGCCCTATGGGTTGTAAACTTCTTTTGTATAGG…
	gin10	Winogradsky Column #1	Pseudomonas protegens	98.26	MK402059.1	GGCAGCACGGGTACTTGTACCTGGTGGCGAGCGGCGGACNNNTNAGTAATGCCTAGGAATCTGCCTAGTAGTGGGGGATAACGTCCGGAAACGGGCGCTAATACCGCATACGTCCTACGGGAGAAAGTGGGGGATCTTCGGACCTCACGCTATTAGATGAGCCTAGGTCGGATTAGCTAGTTGGTGAGGTAATGGCTCACCAAGGCGACGATCCGTAACTGGTCTGAGAGGATGATCAGTCACACTGGAACTGAGACACGGTCCAGACTCCTACGGGAGGCAGCAGTGGGGAATATTGGACAATGGGCGAAAGCCTGATCCAGCCATGCCGCGTGTGTGAAGAAGGTCTTCGGATTGTAAAGCACTTTAAGTTGGGAGGAAGGGCAGTTACCTAATACG…
	gin11	Winogradsky Column #1	Sphingobium yanoikuyae	97.6	MH394206.1	GGCGCTGCTATAcATGCAGTCGAaCGAGATCTTCGGATCTAGTGGCGCACGGGTGCGTAACGCGTGGGAATCTGCCCTTGGGTTCGGAATAACTTCTGGAAACGGAAGCTAATACCGGATGATGACGTAAGTCCAAAGATTTATCGCCCAAGGATGAGCCCGCGTAGGATTAGCTAGTTGGTGGGGTAAAGGCCCACCAAGGCGACGATCCTTAGCTGGTCTGAGAGGATGATCAGCCACACTGGGACTGAGACACGGCCCAGACTCCTACGGGAGGCAGCAGTAGGGAATATTGGACAATGGGCGAAAGCCTGATCCAGCAATGCCGCGTGAGTGATGAAGGCCTTAGGGTTGTAAAGCTCTTTTACCCGGGATGATAATGACAGTACCGGGAGAATA…
	P2-W	Winogradsky Column #1	Pseudomonas sp.	98.53	LN854573.1	GGTAGAGAGAAGCTTGCTTCTCTTGAGAGCGGCGGACGGGTGAGTAATGCCTAGGAATCTGCCTGGTAGTGGGGGATAACGCTCGGAAACGGACGCTAATACCGCATACGTCCTACGGGAGAAAGCAGGGGACCTTCGGGCCTTGCGCTATCAGATGAGCCTAGGTCGGATTAGCTAGTTGGTGAGGTAATGGCTCACCAAGGCGACGATCCGTAACTGGTCTGAGAGGATGATCAGTCACACTGGAACTGAGACACGGTCCAGACTCCTACGGGAGGCAGCAGTGGGGAATATTGGACAATGGGCGAAAGCCTGATCCAGCCATGCCGCGTGTGTGAAGAAGGTCTTCGGATTGTAAAGCACTTTAAGTTGGGAGGAAGGGTTGTAACCTAATACGTT…
	C1-Y	Winogradsky Column #1	Chryseobacterium sp.	97.84	PQ451563.1	GGTATTTGTTCTTCGGAACAGAGAGAGCGGCGTACGGGTGCGGAACACGTGTGCAACCTGCCTTTATCAGGGAGATAGCCTTTCGAAAGGAAGATTAATATCCCATAATATATTAAGTGGCATCACTTGATATTGAAAGCTCCGGCGGATAAAGATGGGCACGCGCAAGATTAGATAGTTGGTAGGGTAACGGCCTACCAAGTCAGTGATCTTTAGGGGGCCTGAGAGGGTGATCCCCCACACTGGTACTGAGACACGGACCAGACTCCTACGGGAGGCAGCAGTGAGGAATATTGGACAATGGGTGAGAGCCTGATCCAGCCATCCCGCGTGAAGGACGACGGCCCTATGGGTTGTAAACTTCTTTTGTATAGGGATAAACCTTTCCACGTGTGGAAA…
	D1-Y	Winogradsky Column #1	Novosphingobium sp.	96.1	CP141944.1	GGATCTAGTGGCGCACGGGTGCGTAACGCGTGGGAATCTGCCCTTGGGTTCGGAATAACAGTGAGAAATTACTGCTAATACCGGATGATGTCTTCGGACCAAAGATTTATCGCCCAGGGATGAGCCCGCGTAGGATTAGCTAGTTGGTGGGGTAATGGCCTACCAAGGCGACGATCCTTAGCTGGTCTGAGAGGATGATCAGCCACACTGGGACTGAGACACGGCCCAGACTCCTACGGGAGGCAGCAGTGGGGAATATTGGACAATGGGCGAAAGCCTGATCCAGCAATGCCGCGTGAGTGATGAAGGCCTTAGGGTTGTAAAGCTCTTTTACCAGGGATGATAATGACAGTACCTGGAGAATAAGCTCCGGCTAACTCCGTGCCAGCAGCCGCGGTA…
2021	1A	Winogradsky Column #2	Acinetobacter sp.	98.64	PQ236921.1	GGAGAGAGGTAGCTTGCTACTGATCTTAGCGGCGGACGGGNGNNTAATGCTTAGGAATCTGCCTATTAGTGGGGGACAACATTTCGAAAGGAATGCTAATACCGCATACGTCCTACGGGAGAAAGCAGGGGATCTTCGGACCTTGCGCTAATAGATGAGCCTAAGTCGGATTAGCTAGTTGGTGGGGTAAAGGCCTACCAAGGCGACGATCTGTAGCGGGTCTGAGAGGATGATCCGCCACACTGGGACTGAGACACGGCCCAGACTCCTACGGGAGGCAGCAGTGGGGAATATTGGACAATGGGCGGAAGCCTGATCCAGCCATGCCGCGTGTGTGAAGAAGGCCTTATGGTTGTAAAGCACTTTAAGCGAGGAGGAGGCTACTTTAGTTAATACCTA…
	1B	Winogradsky Column #2	Bacillus sp.	80.05	KP877519.1	GGCGGGCGTGCCTAATACATGCAGTCGAGCGGACAGAGGAGAGCTTGCTCCCTGATGTCAGCGGCGGACGGGWGAGTAACACGTGGGTAACCTGCCTGTAAGACTGGGATAACTCCGGGAAACCGGGGCTAATACCGGATGCTTGATTGAACCGCATGGTTCAATTATAAAAGGTGGCTTCKGSTTCCCCCTTAGATGGGCCCCCCGGGGCTTTRCCTATTGGTGAAGGAACCGGTTCCCCARGGCACCAATGCAACCCAACCGAAAAGGTGAATCGCCACACCGGGAATTGAACACCGCCCCAAATCCCACCGGGAGGCACMATAAGGAATCCTCCCCCATGGACCAAAGTCTGAACGAGCCACCCCCCCGGAATGAAGAAAGGTTTTCGAATCTWAA…
	1C	Winogradsky Column #2	Pseudomonas sp.	96.09	JX155403.1	GGCCAGGCAGGTCGCGTAATAACAGAGGGKGCCAGSGTCATCGAGTACTGGCGTAAGCGCGCGTAGGTGGTTYCGTTAGTGGATGTGAATCCCCGGGGCTCACCTGGGACCTGCATCCCAAAACYTGGCSGAGCTAGAGTATGGTAGAGGGGTGGTGGAATTTTCCTGKGTAGCGGTGAAATGCGTAGATATAGGAAGGAACACCAGTGGCGAAAGGCGACCACCTGGACTGATACTGACACTGAGGTGCGAAAGCGTGGGGAGCAAACAGGATTAGATACCCTGGTAGTCCACGCCGTAAACGATGTCAACTAGCCGTTGGGAGCCTTGAGCTCTTAGTGGCGCAGCTAACGCATTAAGTTGACCGCCTGGGGAGTACGGCCGCAAGGTTAAAACTCA…
	1D	Winogradsky Column #2	Pseudomonas sp.	97.4	MG692779.1	GGGCGGGCAGGCCTAACACATGCAAGTCGAGCGGATGAAGGGAGCGTWASTCCTGAATTCAGCGGCGGACGGYTGAGTAATGCCTAGGAATCTGCCTGGTAGTGGGGGACAACGTTTCGAAAGGAACGCTAATACCGCATACGTCCTACGGGAGAAAGCAGGGGACCTTCGGGCCTTGCGCTATCAGATGAGCCTAGGTCGGATTAGCTAGTTGGTGAGGTAATGGCTCACCAAGGCGACGATCCGTAACTGGTCTGAGAGGATGATCAGTCACACTGGAACTGAGACACGGTCCAGACTCCTACGGGAGGCAGCAGTGGGGAATATTGGACAATGGGCGAAAGCCTGATCCAGCCATGCCGCGTGTGTGAAGAAGGTCTTCGGATTGTAAAGCACTTT…
	1E	Winogradsky Column #2	Novosphingobium sp.	96.79	CP147005.1	GGTCGCCTGCCTCCCTTGCGGGTCAGSRMAASGSCTTCGAGTGAATCCAACTCCCATGGTGTGACGGGCGGTGTGTACAAGGCCTGGGAACGTATTCACCGCGGCATGCTGATCCGCGATTACTAGCGATTCCGCCTTCATGCTCTCGAGTTGCAGAGAACAATCCGAACTGAGACGGCTTTTGGAGATTAGCTTGCAGTCGCCTGCTTGCTGCCCACTGTCACCGCCATTGTAGCACGTGTGTAGCCCAGCGTGTAAGGGCCATGAGGACTTGACGTCATCCCCACCTTCCTCCGGCTTATCACCGGCAGTTTCCTTAGAGTGCCCAACTAAATGCTGGCAACTAAGGACGAGGGTTGCGCTCGTTGCGGGACTTAACCCAACATCTCACGACACGAG…
	2E	Winogradsky Column #2	Pseudomonas sp.	95.06	OP407612.1	GGAAGGTTCTGCAAGTCAAGGACCATGTTACGGTTTCTACSTTGCTTTCGGAATTAAAGCMCMTGCTCCACCGCTTWGTRGCGGGCCCCRGTCATCATTTGAGTTTTAACCTWGCGACGTACTCCCCAGMGGTCAACTTAATGCGTTAGCTGSGCCACTAAAATTYTCAASGATTCCAACGGCTAGTTGACATCGTTACGGCGTGGACTACCAGGGTWTCTAATCCTGTTTGCTCCCCACGCKTSCGCACTTCAGTGTCAGTATCAGTCCAGGTGGTCGCCTTCGCCACTGGTGTTCCCTTCCTATATCTACGCATTTCACCGCTACACAGGAAATTCCACCACCCTCTACCGTACTCTAGCTTGCCAGTTTTGGATGCAGTTCCCAGGTTGAGCCCGG…
	3B	Winogradsky Column #2	Pseudomonas sp.	94.16	KY324908.1	GGCAAATTCAACYAGCGCASTWAAACGCAGCGGCCGTWWGGGWGGGTACCGYTTAAAGTTACGAATGYRAAATTCCCCCGGGCCTCAACCTGGGAACTGSMMTCCAAAAACTGGGCRRGGYTAGGAGTATGGTAGACGGTGGKTGGACTTTCCTSSTGYAGCGTSMAAATSGGTAGGWTATAGGAAGGAACCACCCAGTKGTCGAAGGCGACCCACCTGACTGATWAYKGACCACTGAGGTGCSAAAGCGTGGGGAGCAAACMGGATTAGATACCCTGGTAGTCCACGCCKTAAACGATGTCAACTAGCCGTTGGGAGCCTTGAGCTCTTAGTGGCGCAGCTAACGCATTAAGTTGACCGCCTGGGGAGTACGGCCGCAAGGTTAAAACTCAAATGAAT…
	4A	Winogradsky Column #2	Pseudomonas sp.	96.17	KX456390.1	GGCAGCGCGTATCACCGAGGTGCCAAGCGTTATTCGAATACTGACGTAAGCGCGCGCGTAGTGTTTGTTAAGTGGAATGTGAAAGCCCAGGCTCACTGGGAACTGCATCAAACTGGCAAGCTAGAGTACGGTAGAGGGTGGTGAAATTCCTGTGTAGCGTGAAATGCGTAGATATAGGAAAGGAACACCCAGTGGCGAAGGCGACCACTGGACTGATACTGACACTGAGGTGCGAAAGCGTGGGGAGCAAACAGGATTAGATACCCTGGTAGTCCACGCCGTAAACGATGTCAACTAGCCGTTGGAATCCTTGAGATTTTAGTGGCGCAGCTAACGCATTAAGTTGACCGCCTGGGGAGTACGGCCGCAAGGTTAAAACTCAAATGAATTGACGGGGGC…
	4B	Winogradsky Column #2	Pseudomonas sp.	93.53	CP040324.1	GGTAARGTGGGCTTTGKTTAAGTTGGGAYTGTGAAAAGGCCCCGGRCTCAAACCTGGGGGAACYKGCAMTTCCAAAACTSGGCCAAGGCTWRGAGWTACCGGTAGSAGGGTGGGKGGGAATTTTCCCTGGTGGTAGCCGGYKGAAATGCGTMGATATAGGAAGGGAACACCAGTGGCGAAGGSSGACCACCKTGGACTGATACTGACACTGAAGGTGCGAAAGCGTGGGGAGCAAACAGGATTAGATACCCCKGGTAGTCCACGCCGTAAACGATGTCAACTAGCCGTTGGRAATCCTTGAGATTTTAGYGGCGCAGCTAACGCATTWAAGTTGACCGCCTGGGGAGTACGGCCGCAAGGTTTAAAACTCAAATGAATTGACGGGGGCCCGCACAAGCG…
	4C	Winogradsky Column #2	Pseudomonas sp.	94.71	GQ101457.1	GGGCGGGCAGGACTAACACATGCAAGTCGAGCGGATGAGGGAGSTGWGSTCCTTGATTCAGCGGCGGACSGYGTGAGTAATGCCTAGGAATCTGCCTGGTAGTGGGGGACAACGTTTCGAAAGGAACGCTAATACCGCATACGTCCTACGGGAGAAAGCAGGGGACCTTCGGGCCTTGCGCTATCAGATGAGCCTAGGTCGGATTAGCTAGTTGGTGGGGTAATGGCTCACCAAGGCGACGATCCGTAACTGGTCTGAGAGGATGATCAGTCACACTGGAACTGAGACACGGTCCAGACTCCTACGGGAGGCAGCAGTGGGGAATATTGGACAATGGGCGAAAGCCTGATCCAGCCATGCCGCGTGTGTGAAGAAGGTCTTCGGATTGTAAAGCACTTT…
	5A	Winogradsky Column #2	Comamonas testosteroni	94.41	PP320388.1	GGTAAGAGACTAGCACCGCYTAACTAAGGTGCCAGGCCAGCCGCGGTAATTCSTAAGGCKTGCCATGCGTTAATTCGGAATTACTGGGGSTAAAGCKTGGCGCAGGGCGGTTTTGTAAGACMAGTRGKTGCAAATCCCCCGGGGCYTCAACCCTGGGAACTGCCATGTGGACTGCAAAGSTCTAGASKGCGGCAGAGGGGGGATGGAATTTCCGCGTGTAGCCAGKGAAATGSSGTAGATWTGSGGAGGAAACMMCCGATGGCGAAGGCAATCCCCTGGGCCTGCACTGACGCTCATGCACGAAAGCGTGGGGAGCAAACAGGATTAGATACCCTGGTAGTCCACGCCCTAAACGATGTCAACTGGTTGTTGGGTCTTAACTGACTCAGTAACGAAGCT…
	6A	Winogradsky Column #2	Stenotrophomonas sp.	95.68	MF988728.1	GGGCGGTRGCCTAACACATGCAAGTCGAACGGCAGCACAGRAGAGMTTGCTCTCTGGGTGGCGAGTGGCSKACGGGTGAGGAATACATCGGAATCTACTCTGTCGTGGGGGATAACGTAGGGAAACTTACGCTAATACCGCATACGACCTACGGGTGAAAGCAGGGGATCTTCGGACCTTGCGCGATTGAATGAGCCGATGTCGGATTAGCTAGTTGGCGGGGTAAAGGCCCACCAAGGCGACGATCCGTAGCTGGTCTGAGAGGATGATCAGCCACACTGGAACTGAGACACGGTCCAGACTCCTACGGGAGGCAGCAGTGGGGAATATTGGACAATGGGCGCAAGCCTGATCCAGCCATACCGCGTGGGTGAAGAAGGCCTTCGGGTTGTAAAGCCC…
	6B	Winogradsky Column #2	Comamonas testosteroni	96.76	MK533979.1	GGGCGGCATGCTTTACACATGCAAGTCGAACGGTAACAGGTCRWSGGATGCTGACGAGTGGCGAACGGGTGAGTAATACATCGGAACGTGCCTAGTAGTGGGGGATAACTACTCGAAAGAGTAGCTAATACCGCATGAGATCTACGGATGAAAGCAGGGGACCTTCGGGCCTTGTGCTACTAGAGCGGCTGATGGCAGATTAGGTAGTTGGTGGGGTAAAGGCTTACCAAGCCTGCGATCTGTAGCTGGTCTGAGAGGACGACCAGCCACACTGGGACTGAGACACGGCCCAGACTCCTACGGGAGGCAGCAGTGGGGAATTTTGGACAATGGGCGAAAGCCTGATCCAGCAATGCCGCGTGCAGGATGAAGGCCCTCGGGTTGTAAACTGCTTTTGTA…
	6C	Winogradsky Column #2	Stenotrophomonas sp.	97.41	OM688861.1	GGTAAATACGAAGATGCAAGCGTTACTCGATAACTGGGCGTAAGCGKGCGTAGTTGTCCGTTAAGTCCGTTGTGAAGCCTGGGCTCAACCTGGACTGCAGTGGATACTGGGCGACTAGAGTGTGGTAGAGGGTAGCGGAATTTCCTGGTGTAGCAGTGAATGCGTAGAGATCAGGAGGAACATCCATGGCGAAGGCAGCTACCTGGACCAACACTGACACTGAGGCACGAAAGCGTGGGGAGCAAACAGGATTAGATACCCTGGTAGTCCACGCCCTAAACGATGCGAACTGGATGTTGGGTGCAATTTGGCACGCAGTATCGAAGCTAACGCGTTAAGTTCGCCGCCTGGGGAGTACGGTCGCAAGACTGAAACTCAAAGGAATTGACGGGGGCCCGC…
	6D	Winogradsky Column #2	Comamonas testosteroni	94	GQ472946.1	GGGCGGGCATGCTTTACACATGCAAGTCGAACGGTAACAGGGCAATSRGRTGCTGACGAGTGGCGAACGGGTGAGTAATACATCGGAACGTGCCTAGTAGTGGGGGATAACTACTCGAAAGAGTAGCTAATACCGCATGAGATCTACGGATGAAAGCAGGGGACCTTCGGGCCTTGTGCTACTAGAGCGGCTGATGGCAGATTAGGTAGTTGGTGGGGTAAAGGCTTACCAAGCCTGCGATCTGTAGCTGGTCTGAGAGGACGACCAGCCACACTGGGACTGAGACACGGCCCAGACTCCTACGGGAGGCAGCAGTGGGGAATTTTGGACAATGGGCGAAAGCCTGATCCAGCAATGCCGCGTGCAGGATGAAGGCCCTCGGGTTGTAAACTGCTTTTG…
	6E	Winogradsky Column #2	Priestia sp.	95.02	KY490120.1	GGGCGGCGTGCCTATACATGCAAGTCGAGCGAACTGATTAGAAGASWKGCTTCTATGACGTTAGCGGCGGYYKGGTGAGTAACACGTGGGCAACCTGCCTGTAAGACTGGGATAACTTCGGGAAACCGAAGCTAATACCGGATAGGATCTTCTCCTTCATGGGAGATGATTGAAAGATGGTTTCGGCTATCACTTACAGATGGGCCCGCGGTGCATTAGCTAGTTGGTGAGGTAACGGCTCACCAAGGCAACGATGCATAGCCGACCTGAGAGGGTGATCGGCCACACTGGGACTGAGACACGGCCCAGACTCCTACGGGAGGCAGCAGTAGGGAATCTTCCGCAATGGACGAAAGTCTGACGGAGCAACGCCGCGTGAGTGATGAAGGCTTTCGGGTC…
	7A	Winogradsky Column #2	Comamonas testosteroni	93.95	FJ893974.1	GGGCGGGCATGCTTTACACATGCAAGTCGAACGGTAACAGGTCGKCRAGRTGCTGACGAGTGGCGAACGGGTGYYGTAATACATCGGAACGTGCCTAGTAGTGGGGGATAACTACTCGAAAGAGTAGCTAATACCGCATGAGATCTACGGATGAAAGCAGGGGACCTTCGGGCCTTGTGCTACTAGAGCGGCTGATGGCAGATTAGGTAGTTGGTGGGGTAAAGGCTTACCAAGCCTGCGATCTGTAGCTGGTCTGAGAGGACGACCAGCCACACTGGGACTGAGACACGGCCCAGACTCCTACGGGAGGCAGCAGTGGGGAATTTTGGACAATGGGCGAAAGCCTGATCCAGCAATGCCGCGTGCAGGATGAAGGCCCTCGGGTTGTAAACTGCTTTT…
	7B	Winogradsky Column #2	Achromobacter denitrificans	96.44	CP036344.1	GGATGGCTAGCGGGGATGCCTTACACATGCAAGTCGAACGGCAGCACGGASTAKRCRGTCTGGTGGCGAGTGGCGAACGGYTGAGTAATGTATCGGAACGTGCCCAGTAGCGGGGGATAACTACGCGAAAGCGTAGCTAATACCGCATACGCCCTACGGGGGAAAGCAGGGGATCGCAAGACCTTGCACTATTGGAGCGGCCGATATCGGATTAGCTAGTTGGTGGGGTAACGGCTCACCAAGGCGACGATCCGTAGCTGGTTTGAGAGGACGACCAGCCACACTGGGACTGAGACACGGCCCAGACTCCTACGGGAGGCAGCAGTGGGGAATTTTGGACAATGGGGGAAACCCTGATCCAGCCATCCCGCGTGTGCGATGAAGGCCTTCGGGTTGTAA…
2022	A1	Winogradsky Column #3	Enterobacter mori	90.77	FJ976607.1	GGGCAGGCTACACATGCAAGTCGAGCGGCAGCGGAGGTGGTTGGCTACTTTGCCGGAGAGCGGCGGAGGGGTGAGTAGTGTCTGGGAAAGTGCCTGATGGAGGGGGATAACTACTGGAAACGGTATCTAATACCGCATAACGTCGCAAGACCAAAGAGGGGGACCTTCGGGCCTCTTGCCCTCATATGTGCCCAGATGGGATTAGCTAGTAGGGGGGGTAACGGCTCCCCTAGGAGAATATCCCTATGTGGTCTGAGAGGATGACCACCCACTCTGGAACTGACACACGGCCCACACTCCTACGGGAGGCAGCAGTGGGGAATATTGCACAGTGGGCGCAAGCCTGATGCACCCATGCCGCGTGTATGAAGAAGGTCTTCGGGTTGTAAAGTATTTTCC…
	B1	Winogradsky Column #3	Serratia marcescens	91.5	MN691682.1	GGCAGGCCTTAACACATGCAAGTCGAGCGGTAGCACAGGGGAGCTTGCTCCCCGGGTGACGAGCGGCGGACGGGTGAGTAATGTCTGGGAAACTGCCTGATGGAGGGGGATAACTACTGGAAACGGTAGCTAATACCGCATAACGTCGCAAGACCAAAGAGGGGGACCTTCGGGCCTCTTGCCATCAGATGTGCCCAGATGGGATTAGCTAGTAGGTGGGGTAATGGCTCACCTAGGCGACGATCCCTAGCTGGTCTGAGAGGATGACCAGCCACACTGGAACTGAGACACGGTCCAGACTCCTACGGGGAGGCAGCAGTGGGGGAATATTGCACAATGGGCGCAAGCCTGATGCAGCCATGCCGCGTGTGTGAAGAAGGCCTTCGGGTTGGTAAAGCA…
	D1	Winogradsky Column #3	Enterobacter sp.	95.47	KX456426.1	GGCGGCCAGCCTAACACATGCAGTCGAGCGGTAGCACAGGGAAGCTTGCTCCTGGGTGACGAGCGGCGGACGGGTGAGAAATGTCTGGGAAACTGCCTGATGGAGGGGGATAACTACTGGAAACGGTAGCTAATACCGCATAACGTCGCAAGACCAAAGAGGGGGACCTTCGGGCCTCTTGCCATCAGATGTGCCCAGATGGGATTAGCTAGTAGGTGGGGTAACGGCTCACCTAGGCGACGATCCCTAGCTGGTCTGAGAGGATGACCAGCCACACTGGAACTGAGACACGGTCCAGACTCCTACGGGAGGCAGCAGTGGGGAATATTGCACAATGGGCGCAAGCCTGATGCAGCCATGCCGCGTGTATGAAGAAGGCCTTCGGGTTGTAAAGTACTT…
	F1	Winogradsky Column #3	Pantoea sp.	97.38	ON778745.1	GGCCGGCCCTACACATGCAGTCGACGGTAGCACAGAGAGCTTGCTCTCGGGTGACGAGTGGCGGACGGGTGAGTAACGTCTGGGAAACTGCCCGATGGAGGGGGATAACTACTGGAAACGGTAGCTAATACCGCATAACGTCGCAAGACCAAAGTGGGGGACCTTCGGGCCTCACACCATCGGATGTGCCCAGATGGGATTAGCTAGTAGGTGGGGTAATGGCTCACCTAGGCGACGATCCCTAGCTGGTCTGAGAGGATGACCAGCCACACTGGAACTGAGACACGGTCCAGACTCCTACGGGAGGCAGCAGTGGGGAATATTGCACAATGGGCGCAAGCCTGATGCAGCCATGCCGCGTGTATGAAGAAGGCCTTCGGGTTGTAAAGTACTTTCAGC…
	G1	Winogradsky Column #3	Pseudomonas sp.	97.85	LN854573.1	GGTAGAGAGAAGCTTGCTTCTCTTGAGAGCGGCGGACGGGTGAGTAATGCCTAGGAATCTGCCTGGTAGTGGGGGATAACGCTCGGAAACGGACGCTAATACCGCATACGTCCTACGGGAGAAAGCAGGGGACCTTCGGGCCTTGCGCTATCAGATGAGCCTAGGTCGGATTAGCTAGTTGGTGAGGTAATGGCTCACCAAGGCGACGATCCGTAACTGGTCTGAGAGGATGATCAGTCACACTGGAACTGAGACACGGTCCAGACTCCTACGGGAGGCAGCAGTGGGGAATATTGGACAATGGGCGAAAGCCTGATCCAGCCATGCCGCGTGTGTGAAGAAGGTCTTCGGATTGTAAAGCACTTTAAGTTGGGAGGAAGGGTTGTAACCTAATACGTT…
	G2	Winogradsky Column #3	Bacillus sp.	96.85	MW821262.1	GGTGCTATAcATGCaAGTCGAGCGAATGGATTGAGAGCTTGCTCTCAAGAAGTTAGCGGCGGACGGGTGAGTAACACGTGGGTAACCTGCCCATAAGACTGGGATAACTCCGGGAAACCGGGGCTAATACCGGATAATATTTTGAACTGCATGGTTCGAAATTGAAAGGCGGCTTCGGCTGTCACTTATGGATGGACCCGCGTCGCATTAGCTAGTTGGTGAGGTAACGGCTCACCAAGGCAACGATGCGTAGCCGACCTGAGAGGGTGATCGGCCACACTGGGACTGAGACACGGCCCAGACTCCTACGGGAGGCAGCAGTAGGGAATCTTCCGCAATGGACGAAAGTCTGACGGAGCAACGCCGCGTGAGTGATGAAGGCTTTCGGGTCGTAAAACT…
	G3	Winogradsky Column #3	Chryseobacterium nepalense	97.51	OQ875745.1	GGTAGAGTATCTTCGGAGACTTNNNAGCGGCGTACGGGTGCNNNACACGTGTGCAACCTGCCTTTATCAGGGGGATAGCCTTTCGAAAGGAAGATTAATACCCCATAATATATAGAGTGGCATCACTTTATATTGAAAACTGAGGTGGATAAAGATGGGCACGCGCAAGATTAGATAGTTGGTGAGGTAACGGCTCACCAAGTCGATGATCTTTAGGGGGCCTGAGAGGGTGATCCCCCACACTGGTACTGAGACACGGACCAGACTCCTACGGGAGGCAGCAGTGAGGAATATTGGACAATGGGTTAGCGCCTGATCCAGCCATCCCGCGTGAAGGACGACGGCCCTATGGGTTGTAAACTTCTTTTGTACAGGGATAAACCTATTTACGTGTAAATA…
	H1	Winogradsky Column #3	Klebsiella oxytoca	96.64	LK391630.1	GGCAGGCCTACACATGCAAGTCGAGCGGTAGCACAGGGAGCTTGCTCCTGGGTGACGAGCGGCGGACGGGTGAGTAATGTCTGGGAAACTGCCTGATGGAGGGGGATAACTACTGGAAACGGTAGCTAATACCGCATAACGTCGCAAGACCAAAGAGGGGGACCTTCGGGCCTCTTGCCATCAGATGTGCCCAGATGGGATTAGCTAGTAGGTGGGGTAACGGCTCACCTAGGCGACGATCCCTAGCTGGTCTGAGAGGATGACCAGCCACACTGGAACTGAGACACGGTCCAGACTCCTACGGGAGGCAGCAGTGGGGAATATTGCACAATGGGCGCAAGCCTGATGCAGCCATGCCGCGTGTATGAAGAAGGCCTTCGGGTTGTAAAGTACTTTCAG…
2024	MH-1	Winogradsky Column #4	Enterobacter sp.	98.95	JQ281532.1	GGTAGCACAGCGGGAGCTTGCTCCTGGGTGACGAGCGGCGGACCCGGTGAGTAATGTCTGGGAAACTGCCTGATGGAGGGGGATAACTACTGGAAACGGTAGCTAATACCGCATAACGTCGCAAGACCAAAGAGGGGGACCTTCGGGCCTCTTGCCATCAGATGTGCCCAGATGGGATTAGCTAGTAGGTGGGGTAACGGCTCACCTAGGCGACGATCCCTAGCTGGTCTGAGAGGATGACCAGCCACACTGGAACTGAGACACGGTCCAAACTCCTACGGGAGGCAGCAGTGGGGAATATTGCACAATGGGCGCAAGCGTGATGCAGCCATGCCGCGTGTATGAAGAAGGCCTTCGGGTTGTAAAGTACTTTCAGCGGGGAGGAAGGTGTTGAGGTTA…
	MH-4	Winogradsky Column #4	Leclercia sp.	93.43	KY653114.1	GGAAATCCGAGCGGTAGCACAGGGAGCTTGCTCCTGGGTGACGAGCGGCGGAGGGTGAGTAATGTCTGGGAAACTGCCTGATGGAGGGGGATAACTACTGGAAACGGTAGCTAATACCGCATAACGTCGCAAGACCAAAGAGGGGGACCTTCGGGCCTCTTGCCATCAGATGTGCCCAGATGGGATTAGCTAGTAGGTGGGGTAACGGCTCACCTAGGCGACGATCCCTAGCTGGTCTGAGAGGATGACCAGCCACACTGGAACTGAGACACGGTCCAGACTCCTACGGGAGGCAGCAGTGGGGAATATTGCACAATGGGCGCAAGCCTGATGCAGCCATGCCGCGTGTATGAAGAAGGCCTTCGGGTTGTAAAGTACTTTCAGCGGGGAGGAAGGTGT…
	MH-7	Winogradsky Column #4	Pseudomonas sp.	96.66	OQ923931.1	GGAGAGGACAAAAAAAAAAAAGTCGAGCGGATGATGGGAGCTTGCTCCCGGATTCAGCGGCGGACGGGTGAGTAATGCCTAGGAATCTGCCTGGTAGTGGGGGACAACGTTTCGAAAGGAACGCTAATACCGCATACGTCCTACGGGAGAAAGCAGGGGACCTTCGGGCCTTGCGCTATCAGATGAGCCTAGGTCGGATTAGCTAGTTGGTGGGGTAAAGGCCTACCAAGGCGACGATCCGTAACTGGTCTGAGAGGATGATCAGTCACACTGGAACTGAGACACGGTCCAGACTCCTACGGGAGGCAGCAGTGGGGAATATTGGACAATGGGCGAAAGCCTGATCCAGCCATGCCGCGTGTGTGAAGAAGGTCTTCGGATTGTAAAGCACTTTAAGTT…
	MH-9	Winogradsky Column #4	Enterococcus sp.	98.01	OQ171576.1	GGAGGGGCCCTAATAAATGCAAGGTCGAACGCTTTTTCTTTCACCGGAGCTTGCTCCACCGAAAGAAAAAGAGTGGCGAACGGGTGAGTAACACGTGGGTAACCTGCCCATCAGAAGGGGATAACACTTGGAAACAGGTGCTAATACCGTATAACACTATTTTCCGCATGGAAGAAAGTTGAAAGGCGCTTTTGCGTCACTGGTGGATGGACCCGCGGTGCATTAGCTAGTTGGTGAGGTAACGGCTCACCAAGGCAACGATGCATAGCCGACCTGAGAGGGTGATCGGCCACACTGGGACTGAGACACGGCCCAGACTCCTACGGGAGGCAGCAGTAGGGAATCTTCGGCAATGGACGAAAGTCTGACCGAGCAACGCCGCGTGAGTGAAGAAGGTTT…
	BB-5	Winogradsky Column #4	Burkholderia sp.	96.61	MH266123.1	GGGAAGCCTTTAAAATGCAAGTCGAACGGCAGCACGGGTGCTTGCACCTGGTGGCGAGTGGCGAACGGGTGAGTAATACATCGGAACGTGTCCTGTAGTGGGGGATAGCCCGGCGAAAGCCGGATTAATACCGCATACGATCTACGGATGAAAGCGGGGGATCTTCGGACCTCGCGCTATAGGGGCGGCCGATGGCGGATTAGCTAGTTGGTGAGGTAAAGGCTCACCAAGGCGACGATCCGTAGCTGGTCTGAGAGGACGACCAGCCACACTGGGACTGAGACACGGCCCAGACTCCTACGGGAGGCAGCAGTGGGGAATTTTGGACAATGGGCGAAAGCCTGATCCAGCAATGCCGCGTGTGTGAAGAAGGCCTTCGGGTTGTAAAGCACTTTTGTC…
	BB-6	Winogradsky Column #4	Stenotrophomonas sp.	96.48	KY012253.1	GGGAGGGCCTTACACATGCAAGTCGAACGGCAGCACAGTAAGAGCTTGCTCTTATGGGTGGCGAGTGGCGCGCACGGGTGAGGAATACATCGGAATCTACTCTGTCGTGGGGGATAACGTAGGGAAACTTACGCTAATACCGCATACGACCTACGGGTGAAAGCAGGGGATCTTCGGACCTTGCGCGATTGAATGAGCCGATGTCGGATTAGCTAGTTGGCGGGGTAAAGGCCCACCAAGGCGACGATCCGTAGCTGGTCTGAGAGGATGATCAGCCACACTGGAACTGAGACACGGTCCAGACTCCTACGGGAGGCAGCAGTGGGGAATATTGGACAATGGGCGCAAGCCTGATCCAGCCATACCGCGTGGGTGAAGAAGGCCTTCGGGTTGTAAAGC…
	BB-7	Winogradsky Column #4	Stenotrophomonas maltophilia	95.95	PQ578340.1	GGTGGGGGCTACAAATGGCAAGTCGAACGGGAGCACAGTAAGAGCTTGCTCTTACGAGTGGCGAGTGGTGCCCGGGGGAGGAATACATCGGAATCTACTCTGTCGTGAGGGGATAACGTAGGGAAACTTACGCTAATACCGCATACGACCTACGGGTGAAAGCAGGGGATCTTCGGACCTTGCGCGATTGAATGAGCCGATGTCGGATTAGCTAGTTGGCGGGGTAAAGGCCCACCAAGGCGACGATCCGTAGCTGGTCTGAGAGGATGATCAGCCACACTGGAACTGAGACACGGTCCAGACTCCTACGGGAGGCAGCAGTGGGGAATATTGGACAATGGGCGCAAGCCTGATCCAGCCATACCGCGTGGGTGAAGAAGGCCTTCGGGTTGTAAAGCC…
	BB-11	Winogradsky Column #4	Klebsiella sp.	97.17	OP458827.1	GGACCGAAGCCCTAAAAAATGAAAACCTCGACGGTAGCACAGAGAGCTTGCTCTCGGGTGACGAGTGGCGGACGCGGTGAGTAATGTCTGGGAAACTGCCTGATGGAGGGGGATAACTACTGGAAACGGTAGCTAATACCGCATAACGTCGCAAGACCAAAGAGGGGGACCTTCGGGCCTCTTGCCATCAGATGTGCCCAGATGGGATTAGCTAGTAGGTGGGGTAACGGCTCACCTAGGCGACGATCCCTAGCTGGTCTGAGAGGATGACCAGCCACACTGGAACTGAGACACGGTCCACACTCCTACGGGAGGCAGCAGTGGGGAATATTGCACAATGGGCGCAAGCCTGATGCAGCCATGCCGCGTGTATGAAGAAGGCCTTCGGGTTGTAAAGTA…
	BB-13	Winogradsky Column #4	Pantoea sp.	97.18	CP002433.1	GGAGGACGCTAATATGGCAAGTCGGAACGGTAGCACAGAGGAGCTTGCTCCTTGGGTGACGAGTGGCGGACGGGTGAGTAATGTCTGGGGATCTGCCCGATGGAGGGGGATAACTACTGGAAACGGTAGCTAATACCGCATAACGTCGCAAGACCAAAGTGGGGGACCTTCGGGCCTCACACCATCGGATGAACCCAGATGGGATTAGCTAGTAGGTGGGGTAACGGCTCACCTAGGCGACGATCCCTAGCTGGTCTGAGAGGATGACCAGCCACACTGGAACTGAGACACGGTCCAGACTCCTACGGGAGGCAGCAGTGGGGAATATTGCACAATGGGCGCAAGCCTGATGCAGCCATGCCGCGTGTATGAAGAAGGCCTTCGGGTTGTAAAGTACTT…
	BB-18	Winogradsky Column #4	Klebsiella michiganensis	97.59	MN758876.1	GGCCGTAAACAATGCAAGTTCGAACGGTAGCACAGAGAGCTTGCTCTCGGGTGACGAGTGGCGGACGGGTGAGTAATGTCTGGGAAACTGCCTGATGGAGGGGGATAACTACTGGAAACGGTAGCTAATACCGCATAACGTCGCAAGACCAAAGAGGGGGACCTTCGGGCCTCTTGCCATCAGATGTGCCCAGATGGGATTAGCTAGTAGGTGGGGTAACGGCTCACCTAGGCGACGATCCCTAGCTGGTCTGAGAGGATGACCAGCCACACTGGAACTGAGACACGGTCCAGACTCCTACGGGAGGCAGCAGTGGGGAATATTGCACAATGGGCGCAAGCCTGATGCAGCCATGCCGCGTGTATGAAGAAGGCCTTCGGGTTGTAAAGTACTTTCAGC…
	BB-21	Winogradsky Column #4	Roseomonas sp.	99.28	KC764968.1	GGGCCGGTAAACCTTTTTCGAATACTTGGAGGTGGGGGACAACCCTGGGAAACTAGGGCTAATACCGCATATGGACTGAGGTCCAAAGCCGTGAGGCGCCTTGAGAGTAGCCTGCGTCCGATTAGCTAGTTGGTGGGGTAAAGGCCTACCAAGGCGACGATCGGTAGCTGGTCTGAGAGGACGACCAGCCACACTGGGACTGAGACACGGCCCAGACTCCTACGGGAGGCAGCAGTGGGGAATATTGGACAATGGGCGCAAGCCTGATCCAGCAATGCCGCGTGGGTGAAGAAGGTCTTCGGATCGTAAAGCCCTTTCGGCGGGGACGATGATGACGGTACCCGCAGAAGAAGCCCCGGCTAACTTCGTGCCAGCAGCCGCGGTAATACGAAGGGGGCT…
2025	F1-1	Rapid Flask Culturing	Pseudomonas sp.	97.39	OP364790.1	GGCATGCGCGGCTCATAACTTGCCAAGTACGAAGCGGATGAAGAGGAAGCTCTGCTTCTTCGAGNCAGCGGCGGACGGGTGAGTAATGCCTAGGAATCTGCCTGGTAGTGGGGGACAACGTTTCGAAAGGAACGCTAATACCGCATACGTCCTACGGGAGAAAGCAGGGGACCTTCGGGCCTTGCGCTATCAGATGAGCCTAGGTCGGATTAGCTAGTTGGTGAGGTAATGGCTCACCAAGGCGACGATCCGTAACTGGTCTGAGAGGATGATCAGTCACACTGGAACTGAGACACGGTCCAGACTCCTACGGGAGGCAGCAGTGGGGAATATTGGACAATGGGCGAAAGCCTGATCCAGCCATGCCGCGTGTGTGAAGAAGGTCTTCGGATTGTAAAG…
	F1-2	Rapid Flask Culturing	Acinetobacter sp.	98.33	MK000838.1	GGGATGCGGAGCTTAACCATGCAAGTCGAGCGGGGAATGTAGCTTGCTACATTACCTAGCGGCGGACGGGTGAGTAATGCTTAGGAATCTGCCTATTAGTGGGGGACAACATTTCGAAAGGAATGCTAATACCGCATACGCCCTACGGGGGAAAGCAGGGGATCTTCGGACCTTGCGCTAATAGATGAGCCTAAGTCGGATTAGCTAGTTGGTGGGGTAAAGGCCTACCAAGGCGACGATCTGTAGCGGGTCTGAGAGGATGATCCGCCACACTGGGACTGAGACACGGCCCAGACTCCTACGGGAGGCAGCAGTGGGGAATATTGGACAATGGGGGGAACCCTGATCCAGCCATGCCGCGTGTGTGAAGAAGGCCTTTTGGTTGTAAAGCACTTTAAG…
	F1-3	Rapid Flask Culturing	Raoultella sp.	94.04	MH671639.1	GGGCANGCGCAGGCCCATAACATTGCCAAGTCGAAGCGGTAGCACAGGAGTAGTTATGTTTCCTCCGGGTGACGAGCGGCGGACGGGTGAGTAATGTCTGGGAAACTGCCTGATGGAGGGGGATAACTACTGGAAACGGTATCTAATACCGCATAACGTCGCAAGACCAAAGTGGGGGACCTTCGGGCCTCATGCCATCATATGTGCCCAGATGGGATTATCTAATAGGTGGGGTAATGGCTCACCTAGGCCACGATCCCTATCTGGTCTGAGAGGATGACCACCCACACTGGAACTGAGACACGGTCCACACTCCTACGGGAGGCAGCAGTGGGGAATATTGCACAATGGGCGCAAGCCTGATGCACCCATGCCGCGTGTATGAAGAAGGCCTTCGGG…
	F1-4	Rapid Flask Culturing	Leclercia adecarboxylata	99.75	CP083630.1	GGGCCATGATGACTTGACGTCATCCCCACCTTCCTCCAGTTTATCACTGGCAGTCTCCTTTGAGTTCCCGGCCTAACCGCTGGCAACAAAGGATAAGGGTTGCGCTCGTTGCGGGACTTAACCCAACATTTCACAACACGAGCTGACGACAGCCATGCAGCACCTGTCTCAGAGTTCCCGAAGGCACCAATCCATCTCTGGAAAGTTCTCTGGATGTCAAGAGTAGGTAAGGTTCTTCGCGTTGCATCGAATTAAACCACATGCTCCACCGCTTGTGCGGGCCCCCGTCAATTCATTTGAGTTTTAACCTTGCGGCCGTACTCCCCAGGCGGTCGACTTAACGCGTTAGCTCCGGAAGCCACTCCTCAAGGGAACAACCTCCAAGTCGACATCGTTTAC…
	F1-5	Rapid Flask Culturing	Pseudomonas sp.	98.78	KX456290.1	GGCTGGGGAGCCAACCATTGCAAGTCGAGCGGATGAGAAGAGCTTNGCTACTATCGATCTCAGCGGCGGACGGGTGAGTAATGCCTAGGAATCTGCCTGGTAGTGGGGGACAACGTTTCGAAAGGAACGCTAATACCGCATACGTCCTACGGGAGAAAGCAGGGGACCTTCGGGCCTTGCGCTATCAGATGAGCCTAGGTCGGATTAGCTAGTTGGTGAGGTAATGGCTCACCAAGGCGACGATCCGTAACTGGTCTGAGAGGATGATCAGTCACACTGGAACTGAGACACGGTCCAGACTCCTACGGGAGGCAGCAGTGGGGAATATTGGACAATGGGCGAAAGCCTGATCCAGCCATGCCGCGTGTGTGAAGAAGGTCTTCGGATTGTAAAGCACTT…
	F1-6	Rapid Flask Culturing	Enterobacter sp.	100	CP066278.1	GGGATAACTACTGGAAACGGTAGCTAATACCGCATAACGTCGCAAGACCAAAGAGGGGGACCTTCGGGCCTCTTGCCATCAGATGTGCCCAGATGGGATTAGCTAGTAGGTGGGGTAACGGCTCACCTAGGCGACGATCCCTAGCTGGTCTGAGAGGATGACCAGCCACACTGGAACTGAGACACGGTCCAGACTCCTACGGGAGGCAGCAGTGGGGAATATTGCACAATGGGCGCAAGCCTGATGCAGCCATGCCGCGTGTATGAAGAAGGCCTTCGGGTTGTAAAGTACTTTCAGCGGGGAGGAAGGTGTTGAGGTTAATAACCTCAGCAATTGACGTTACCCGCAGAAGAAGCACCGGCTAACTCCGTGCCAGCAGCCGCGGTAATACGGAGGGTG…
	F1-7	Rapid Flask Culturing	Raoultella sp.	96.27	MH671639.1	GGGCATGNGCGGCCATAACATTGCCAAGTCGAAGCGGTAGCACAGGAGAAGCTTTGCTTCCTCCGGGTGACGAGCGGCGGACGGGTGAGTAATGTCTGGGAAACTGCCTGATGGAGGGGGATAACTACTGGAAACGGTATCTAATACCGCATAACGTCGCAAGACCAAAGTGGGGGACCTTCGGGCCTCATGCCATCATATGTGCCCAGATGGGATTATCTAGTAGGTGGGGTAATGGCTCACCTAGGCCACGATCCCTATCTGGTCTGAGAGGATGACCACCCACACTGGAACTGAGACACGGTCCACACTCCTACGGGAGGCAGCAGTGGGGAATATTGCACAATGGGCGCAAGCCTGATGCACCCATGCCGCGTGTATGAAGAAGGCCTTCGGGTT…
	F1-8	Rapid Flask Culturing	Pseudomonas sp.	98.28	KC773999.1	GGCATCGGCAGCTCATAGACTTGCCAAGTCGAAGCGGATGAGAGTAAGCTCTGCTACTANACGATTCAGCGGCGGACGGGTGAGTAATGCCTAGGAATCTGCCTGGTAGTGGGGGACAACGTTTCGAAAGGAACGCTAATACCGCATACGTCCTACGGGAGAAAGCAGGGGACCTTCGGGCCTTGCGCTATCAGATGAGCCTAGGTCGGATTAGCTAGTTGGTGAGGTAATGGCTCACCAAGGCGACGATCCGTAACTGGTCTGAGAGGATGATCAGTCACACTGGAACTGAGACACGGTCCAGACTCCTACGGGAGGCAGCAGTGGGGAATATTGGACAATGGGCGAAAGCCTGATCCAGCCATGCCGCGTGTGTGAAGAAGGTCTTCGGATTGTAAA…
	F1-9	Rapid Flask Culturing	Klebsiella sp.	83.74	KU724367.1	GGGCCAAGGGCGGCCTAACCTAGCAACTCTCAGCGGAGTGTTAAGCTACCTTCGTTTTTTTGCTGACACTCCCATGATGTGGTGTTGAGGTGTGGGCAACGGCCTGATACATGGGGATAACAACAGTCTAATGTACCATAACCAGCGATTCCTACCTCGAGCAGTCAGAGGGGACCTACTCCGCCCCTGACTATCACATGTGTTATGATGGGATTATCGCTCTCGTGAGGTCACTGCTCTCTGTATGCGACCATTGCTACACTGGTCGGAGCCGATGACCAAACGCCCTGGATCACATACCCTCTTCCCACCCTTCCTCCAGGTTATCACTGGGGAATATCGTTTAATTTGCCCGCCCCACATCTAGCCATGCCGGATGAAGGATGAACGGCCTTCCCG…
	F1-10	Rapid Flask Culturing	Pseudomonas sp.	89.97	PQ223016.1	GGGCATGGACAGGCCTTAGCATGCCAAGGTTCTAGCGGAAAGTAAAACAGCTTGCTCTTCGGGTGCAGCGGCTGACCGGGTGAGTAATGCCTAGGAATCTGCCTGGTAGTGGGGGACAACGTTTCGAATGGAACGCTAATACCGCATACCTCCTACGGGAGAAAGCAGGGGACCTTCAGGCCTTGCGCTATAATATGATCCTATGTGTGATAATCTATTTGGTGGGGTAATGGCTCACCCTCGCTACCATCCATAACTGGTCTGAGAGGATGATCGCTCACACGGGAACTGAGACACGGTTCCCAACTCCTACTGCAGGCAGCTTTGGGGAATATTGCACCATGGGCTGAACCCCTGATCCAGCCTTGCCACTTGTGACAAGGAATGTCTTCCGATTGT…
	F1-11	Rapid Flask Culturing	Pseudomonas putida	84.69	KY984293.1	GGGCCCNGGAGCNGCCTTAGCATGCCAATTCTCGCGGAAAGTAAAACAGCTTTGCTCTTCGGTTCAGCCCGCTGACGGGTGTGCTGATGNNGTAGTGAAGCTCACACGGGCTAGTGAGCGGACAACGCTCGTCGACATTGAACACTCATACCTACTACCTCCTCCGACTATAAAGCAGGGGACCTGCAGATCGTGATCCTATACTATGATCCTATGTGTGATAATATATCTGGTGAGGTAATGGCTCACCCTCGGTACCATCCATTGCTGGTCTGATATGATGATCGCCCACACGGGAACTGAGACTTGGCTCCCAACTCCTCCTGCATGCAGCTTGGGGGAATATTGCACCATGGACTGAACCCCTGATCCATGCCTTGCCACTTGTGTCAAGAATGG…
	F1-12	Rapid Flask Culturing	Pseudomonas sp.	94.57	MW631970.1	GGCATGCGCGGCCAACCATTGCAAGTCGAGCGGATGAGAGGAAGCTATGCTACTATACGATTACAGCGGCGGACGGGTGAGTAATGCCTAGGAATCTGCCTGGTAGTGGGGGACAACGTTTCGAAAGGAACGCTAATACCGCATACGTCCTACGGGAGAAAGCAGGGGACCTTCGGGCCTTGCGCTATCAGATGAGCCTAGGTCGGATTAGCTAGTTGGTGAGGTAATGGCTCACCAAGGCGACGATCCGTAACTGGTCTGAGAGGATGATCAGTCACACTGGAACTGAGACACGGTCCAGACTCCTACGGGAGGCAGCAGTGGGGAATATTGGACAATGGGCGAAAGCCTGATCCAGCCATGCCGCGTGTGTGAAGAAGGTCTTCGGATTGTAAAGCA…
	F2-1	Rapid Flask Culturing	Raoultella ornithinolytica	99.45	OR646540.1	GGGATAACTACTGGAAACGGTAGCTAATACCGCATAATGTCGCAAGACCAAAGTGGGGGACCTTCGGGCCTCATGCCATCAGATGTGCCCAGATGGGATTAGCTGGTAGGTGAGGTAATGGCTCACCTAGGCGACGATCCCTAGCTGGTCTGAGAGGATGACCAGCCACACTGGAACTGAGACACGGTCCAGACTCCTACGGGAGGCAGCAGTGGGGAATATTGCACAATGGGCGCAAGCCTGATGCAGCCATGCCGCGTGTATGAAGAAGGCCTTCGGGTTGTAAAGTACTTTCAGCGAGGAGGAAGGTGCTGAGGTTAATAACCTCAGCAATTGACGTTACTCGCAGAAGAAGCACCGGCTAACTCCGTGCCAGCAGCCGCGGTAATACGGAGGGTG…
	F2-2	Rapid Flask Culturing	Leclercia sp.	94.71	CP152474.1	GGGCCATGGNGCNGGCTAGCACANTAGCAGGTCTGCACCGGCGTCAAGGACANGTATATTGCTTCTTGTCGCACCGAGAGCGGCGGAGGGATGAGTAGTGTGTGGGAAGCCGCGGAACGGATGGGCCGTAGCATTCTGATCTACGATTACTAGCGATTCCGACTTCATGGAGTCGAGTTGCAGACTCCAATCCGGACTACGACGCACTTTATGAGGTCCGCTTGCTCTCGCGAGGTCGCTTCTCTTTGTATGCGCCATTGTAGCACGTGTGTAGCCCTACTCGTAAGGGCCATGATGACTTGACGTCATCCCCACCTTCCTCCAGTTTATCACTGGCAGTCTCCTTTGAGTTCCCGGCCTAACCGCTGGCAACAAAGGATAAGGGTTGCGCTCGTTGCG…
	F2-3	Rapid Flask Culturing	Acinetobacter sp.	99.48	KJ461687.1	GGGAGGCGGAGCTTAACACATGCAAGTCGAGCGGAGTGATGGTGCTTGCACTATCATTTAGCGGCGGACGGGTGAGTAATGCTTAGGAATCTGCCTATTAGTGGGGGACAACATTTCGAAAGGAATGCTAATACCGCATACGTCCTACGGGAGAAAGCAGGGGATCTTCGGACCTTGCGCTAATAGATGAGCCTAAGTCGGATTAGCTAGTTGGTGGGGTAAAGGCCTACCAAGGCGACGATCTGTAGCGGGTCTGAGAGGATGATCCGCCACACTGGGACTGAGACACGGCCCAGACTCCTACGGGAGGCAGCAGTGGGGAATATTGGACAATGGGCGCAAGCCTGATCCAGCCATGCCGCGTGTGTGAAGAAGGCCTTATGGTTGTAAAGCACTTTA…
	F2-4	Rapid Flask Culturing	Raoultella sp.	96.3	OP268549.1	GGGCAAGCGCAGGCCAAACATTGCAAGTCGAAGCGGTAGCACAGTAGTAGCTTGCTCTCGGGTGACGAGCGGCGGACGGGTGAGTAATGTCTGGGAAACTGCCTGATGGAGGGGGATAACTACTGGAAACGGTAGCTAATACCGCATAATGTCGCAAGACCAAAGTGGGGGACCTTCGGGCCTCATGCCATCAGATGTGCCCAGATGGGATTAGCTGGTAGGTGAGGTAATGGCTCACCTAGGCGACGATCCCTAGCTGGTCTGAGAGGATGACCAGCCACACTGGAACTGAGACACGGTCCAGACTCCTACGGGAGGCAGCAGTGGGGAATATTGCACAATGGGCGCAAGCCTGATGCAGCCATGCCGCGTGTATGAAGAAGGCCTTCGGGTTGTAAA…
	F2-5	Rapid Flask Culturing	Enterobacter asburiae	100	CP099972.1	GGGCCTCTTGCCATCAGATGTGCCCAGATGGGATTAGCTAGTAGGTGGGGTAACGGCTCACCTAGGCGACGATCCCTAGCTGGTCTGAGAGGATGACCAGCCACACTGGAACTGAGACACGGTCCAGACTCCTACGGGAGGCAGCAGTGGGGAATATTGCACAATGGGCGCAAGCCTGATGCAGCCATGCCGCGTGTATGAAGAAGGCCTTCGGGTTGTAAAGTACTTTCAGCGGGGAGGAAGGTGTTGAGGTTAATAACCTCAGCAATTGACGTTACCCGCAGAAGAAGCACCGGCTAACTCCGTGCCAGCAGCCGCGGTAATACGGAGGGTGCAAGCGTTAATCGGAATTACTGGGCGTAAAGCGCACGCAGGCGGTCTGTCAAGTCGGATGTGAAA…
	F2-6	Rapid Flask Culturing	Pseudomonas fulva	93.02	PP651544.1	GGCATGCGCAGCCAAACTTGCAAGTCGAAGCGGATGAACAGGTAGCTTATGCTACCCGGATGTCCAGCGGCGGACGGGTGAGTAATGCCTAGGAATCTGCCTGGTAGTGGGGGACAACGTTTCGAAAGGAACGCTAATACCGCATACGTCCTACGGGAGAAAGCAGGGGACCTTCGGGCCTTGCGCTATCAGATGAGCCTAGGTCGGATTAGCTTGTTGGTGAGGTAATGGCTCACCAAGGCGACGATCCGTAACTGGTCTGAGAGGATGATCAGTCACACTGGAACTGAGACACGGTCCAGACTCCTACGGGAGGCAGCAGTGGGGAATATTGGACAATGGGCGAAAGCCTGATCCAGCCATGCCGCGTGTGTGAAGAAGGTCTTCGGATTGTAAAGC…
	F2-7	Rapid Flask Culturing	Raoultella sp.	85.56	HM627388.1	GGCATGGNCGGCCTAGGCCTAGCAACTCTCAGCGGGTGTCAAGCAGAGCTNCGTTTCTTTGGTGACCACTCCCGGANGGTTGAGTGANTGTCTGGGAAACGGCCTGATGCATGGGGATAACTACTGTAAACTGTACCTTAACCCGCAATTCGTCCTTCGAGGAAGTGGGGGACCTTCCGGCCTCATGACCATCGACATGTGTCCCATGATGGGATTATCGCTCTCGTGGGGTAATGGCTCACCTAATATGACGATTGCCTACACTGGTCTGAGAGGATGACCAACCGCCCTGGAACAGATACCCTCTCCCCACCCTTCCTGCAGGTTATCACTGGGGAATATTGTCTTAATGTTGCCCCGCCCATGATGCAGCCATGCCGGATGAAGGATGANGCGCCT…
	F2-8	Rapid Flask Culturing	Pseudomonas sp.	80.58	HG973438.1	GGCCNTGNCAGCCGTAGCATGCCAAGGTTCCTAAGCGGAAATGTACAGACTAACTCTGCTTCTGGATGTCACCCGCTGACGGGTGATTACTGCGCTGAGTGAATCTGCCGGGTAGTGGAGGGACAACCTTTCACATTGAACGCTAATACCTACAAACGTCCTACGAGGACAAAGCAGTGCGGAGCCCTGTCAGGGCCTTGACGCTATACATGACTGATGCCTATTTGNGGATAATACTTGTTGNGTGAGGTAATGGCTCACCCTCGCTACCATCCATTAGCTGGTCGTGAGAGGATGATCGCTCACACGGCCACTGAGACACGGCCCCAACTCCTACTGCAGGCAGCTTGTGGGGAATATTGCACAATGGAGTGAAAGCCTGATCCATGCCATGCCACT…
	F2-9	Rapid Flask Culturing	Acinetobacter sp.	80.92	MK617281.1	GGGCNTGGGCGGCTTAAGCATGCCAAGGTCTAGCGGGGTGATGGTGCTTGCACTATGGTGTAACGGCTGACGGGTGGATGAATGCTCGAGTGAATCTGCCCGATCAGGTGGGCGTACAACATTTCGAAAGGAATGCTAATACCTACTACCTCCTACGGGAGAAAGGAGGGGATCTGCGGACCTTGATGCTAAACTATGAGCCGAATTCTGATAATCTCGTTGGTGGGGTAAAGGCCTACCCTGGGTACCAACTGTTGCGGGTCGTGAGAGGATGATGGCCCTAACGGGGACGGAGACATGGCCTCGACCCCTCCTTCATGCAGTTTGGCGCAGGATTGAACCTTGAGGTTACCCACGTTACTCCCTTGCCAATAGGTGAAAAAGGGTGGGCGCTTCGTT…
	F2-10	Rapid Flask Culturing	Acinetobacter sp.	95.86	HE651912.1	GGCATCGGCAGNTATAGCCATTGCCAAGTTCGAAGCGGGGTGATGGTGCTATGCACTANCACTCTAGCGGCGGACGGGTGAGTAATGCTTAGGAATCTGCCTATTAGTGGGGGACAACATTTCGAAAGGAATGCTAATACCGCATACGTCCTACGGGAGAAAGCAGGGGATCTTCGGACCTTGCGCTAATAGATGAGCCTAAGTCGGATTAGCTAGTTGGTGGGGTAAAGGCCTACCAAGGCGACGATCTGTAGCGGGTCTGAGAGGATGATCCGCCACACTGGGACTGAGACACGGCCCAGACTCCTACGGGAGGCAGCAGTGGGGAATATTGGACAATGGGCGGAAGCCTGATCCAGCCATGCCGCGTGTGTGAAGAAGGCCTTATGGTTGTAAAGC…
	F2-11	Rapid Flask Culturing	Acinetobacter lwoffii	95.83	FJ161367.1	GGGGAGGGGAGGTTACAACATTGCAAGTCGAGCGGGGAAATGTAGCTTGCTACATTACCTNGCGGCGGACGGGTGAGTAATGCTTAGGAATCTGCCTATTAGTGGGGGACAACATTTCGAAAGGAATGCTAATACCGCATACGCCCTACGGGGGAAAGCAGGGGATCTTCGGACCTTGCGCTAATAGATGAGCCTAAGTCGGATTAGCTAGTTGGTGGGGTAAAGGCCTACCAAGGCGACGATCTGTAGCGGGTCTGAGAGGATGATCCGCCACACTGGGACTGAAACACGGCCCAGACTCCTACCGTAGGCAACAGTGGGGAATATTGGACAATGGGGGGAACCCGGTTCCCCCCCTGGCCCGTGAGGGAAGAGANNNNCTTCTGTGGGAGGAATTTA…
	F2-12	Rapid Flask Culturing	Pseudomonas sp.	93.07	JQ697151.1	GGGCCNGGGGCAGGCCTTANGGCATGCCAAGGTTCTAGCGGAAAGTAAAACAGCTTGCTCTTCGGTTCAGCCGCTGACGGGTGGGGNNGATGGGTNGGTGATGCTCGCCTGGCTAGGGAACGTATTCACCGCGACATTCTGATTCGCGATTACTAGCGATTCCGACTTCACGCAGTCGAGTTGCAGACTGCGATCCGGACTACGATCGGTTTTGTGGAGATTAGGCTCCACCTGCGCGGGCTTGGCAACCCTCTNGTACCGACCATTGTAGCACGTGTGTAGCCCAGGCCGTAAGGGCCATGATGACTTGACGTCATCCCCACCTTCCTCCGGTTTGTCACCGGCAATCTCCTTTGAGTGCCCCACATTACCCGCCTGGGAAGCAAGGGACAAGGTTCG…
	F3-1	Rapid Flask Culturing	Acinetobacter calcoaceticus	100	MW632034.1	GGGAGAAAGCAGGGGATCTTCGGACCTTGCGCTAATAGATGAGCCTAAGTCGGATTAGCTAGTTGGTGGGGTAAAGGCCTACCAAGGCGACGATCTGTAGCGGGTCTGAGAGGATGATCCGCCACACTGGGACTGAGACACGGCCCAGACTCCTACGGGAGGCAGCAGTGGGGAATATTGGACAATGGGCGCAAGCCTGATCCAGCCATGCCGCGTGTGTGAAGAAGGCCTTATGGTTGTAAAGCACTTTAAGCGAGGAGGAGGCTACTGAAGTTAATACCTTCAGATAGTGGACGTTACTCGCAGAATAAGCACCGGCTAACTCTGTGCCAGCAGCCGCGGTAATACAGAGGGTGCAAGCGTTAATCGGATTTACTGGGCGTAAAGCGCGCGTAGGCG…
	F3-2	Rapid Flask Culturing	Acinetobacter calcoaceticus	99.58	PQ772624.1	GGGATGCGGAGCTTAACACATGCAAGTCGAGCGGAGTGATGGTGCTTGCACTATCATTTAGCGGCGGACGGGTGAGTAATGCTTAGGAATCTGCCTATTAGTGGGGGACAACATTTCGAAAGGAATGCTAATACCGCATACGTCCTACGGGAGAAAGCAGGGGATCTTCGGACCTTGCGCTAATAGATGAGCCTAAGTCGGATTAGCTAGTTGGTGGGGTAAAGGCCTACCAAGGCGACGATCTGTAGCGGGTCTGAGAGGATGATCCGCCACACTGGGACTGAGACACGGCCCAGACTCCTACGGGAGGCAGCAGTGGGGAATATTGGACAATGGGCGCAAGCCTGATCCAGCCATGCCGCGTGTGTGAAGAAGGCCTTATGGTTGTAAAGCACTTTA…
	F3-3	Rapid Flask Culturing	Raoultella ornithinolytica	96.35	PQ671684.1	GCCANCGGAGCCCATAGAATTGCCAAGTCGAAGCGGTAGCACAGTAGAAGCTATGCTTACTCGGGTGACGAGCGGCGGACGGGTGAGTAATGTCTGGGAAACTGCCTGATGGAGGGGGATAACTACTGGAAACGGTAGCTAATACCGCATAACGTCGCAAGACCAAAGTGGGGGACCTTCGGGCCTCATGCCATCAGATGTGCCCAGATGGGATTAGCTAGTAGGTGGGGTAATGGCTCACCTAGGCGACGATCCCTAGCTGGTCTGAGAGGATGACCAGCCACACTGGAACTGAGACACGGTCCAGACTCCTACGGGAGGCAGCAGTGGGGAATATTGCACAATGGGCGCAAGCCTGATGCAGCCATGCCGCGTGTATGAAGAAGGCCTTCGGGTTGT…
	F3-4	Rapid Flask Culturing	Pseudomonas putida	99.91	KP771807.1	GGGACAACGTTTCGAAAGGAACGCTAATACCGCATACGTCCTACGGGAGAAAGCAGGGGACCTTCGGGCCTTGCGCTATCAGATGAGCCTAGGTCGGATTAGCTAGTTGGTGAGGTAATGGCTCACCAAGGCGACGATCCGTAACTGGTCTGAGAGGATGATCAGTCACACTGGAACTGAGACACGGTCCAGACTCCTACGGGAGGCAGCAGTGGGGAATATTGGACAATGGGCGAAAGCCTGATCCAGCCATGCCGCGTGTGTGAAGAAGGTCTTCGGATTGTAAAGCACTTTAAGTTGGGAGGAAGGGCATTAACCTAATACGTTAGTGTTTTGACGTTACCGACAGAATAAGCACCGGCTAACTCTGTGCCAGCAGCCGCGGTAATACAGAGGGTG…
	F3-5	Rapid Flask Culturing	Acinetobacter sp.	99.59	KJ461687.1	GGGCCNTCGGAGGCTTAACGCATGCCAGGCTCTAGCGGAGATGTAGGGATCTTGCTACTTGGGCGTAACGGCTGACGGGTGAGTAATGCGTAGGAAGTTGCCTATTAGGGGGGGATTCATTTCGAAAGGAATGCTAATACCTACTACCTCCTACGAGAGAAAGGAGGGGATCTTCAGACCTTGCTGCTAGAATATGATCCGATTTCTGATAATCTAATCGGTGGGGTAGGTAGCAACCCTTTGTACCGACCATTGTAGCACGTGTGTAGCCCTGGCCGTAAGGGCCATGATGACTTGACGTCGTCCCCGCCTTCCTCCAGTTTGTCACTGGCAGTATCCTTAAAGTTCCCGACATTACTCGCTGGCAAATAAGGAAAAGGGTTGCGCTCGTTGCGGGAC…
	F3-6	Rapid Flask Culturing	Acinetobacter sp.	96.61	MK000867.1	GGGCAGGGNCGCTGAACGCGTGGCCAAGTCTAGCGGGGATATAGTCTCTCTGACTCCTTGGCCTAACGGCGGACGGGTGAGTGATGCGTAGGAAGCTGCCTATCAGGGGGGGACTACATTTCGGAAGGAAGGTTCATACCTACTACCCCCTACGAGGGAAAGGAGGGGATTTGCAGACTCCAATCCGGACTATGATCGGCTTTTTGATATTATCATCCTCTCGCGAGGTAGCAACCCTTTGTACCGACCATTGTAGCACGTGTGTAGCCCTGGTCGTAAGGGCCATGATGACTTGACGTCGTCCCCGCCTTCCTCCAGTTTGTCACTGGCAGTATCCTTAAAGTTCCCGGCTTAACCCGCTGGCAAATAAGGAAAAGGGTTGCGCTCGTTGCGGGACTT…
	F3-7	Rapid Flask Culturing	Acinetobacter sp.	99.46	LC010332.1	GGCATGGGCGCTGAACGCATGCAAGCTCTAGCGGAGAGAGGTAGCTTGCTACTTGAGCGTAGCAGGCTGACGGGTGAGTGATGCTTAGGAAGCTGCCGATTAGTGGGGGACNCATTTCGGCAGGAATGCTAATACCGACTACGTCCTACGGGAGAAAGGAGGGGATCTTCGGACCTTGCGCTAAAATATGAGCCTAATTCTGATAATCTAGTTGGTGGGGTAAGGGCCAACCCTTGGTACCGACCATTGTAGGACGTGTGTAGCCCTGGCCGTAAGGGCCATGATGACTTGACGTCGACCCCGCCTTCCTCCAGTTTGTCACTGGCAGTATCCTTAAAGTTCCCGACATTACTCGCTGGCAAATAAGGAAAAGGGTTGCGCTCGTTGCGGGACTTAACC…
	F3-8	Rapid Flask Culturing	Acinetobacter sp.	99.68	MN240422.1	GGGGAAGCGCGGCTTAACCATGCAAGTCGAGCGGAGAGAGGTAGCTTGCTACTGATCTTAGCGGCGGACGGGTGAGTAATGCTTAGGAATCTGCCTATTAGTGGGGGACAACATTTCGAAAGGAATGCTAATACCGCATACGTCCTACGGGAGAAAGCAGGGGATCTTCGGACCTTGCGCTAATAGATGAGCCTAAGTCGGATTAGCTAGTTGGTGGGGTAAAGGCCTACCAAGGCGACGATCTGTAGCGGGTCTGAGAGGATGATCCGCCACACTGGGACTGAGACACGGCCCAGACTCCTACGGGAGGCAGCAGTGGGGAATATTGGACAATGGGCGGAAGCCTGATCCAGCCATGCCGCGTGTGTGAAGAAGGCCTTATGGTTGTAAAGCACTTTA…
	F3-9	Rapid Flask Culturing	Pseudomonas sp.	99.79	PQ288760.1	GGGCGGGGGGCTACNATGCAAGTCGAGCGGATGAGAAGAGCTTGCTCTTCGATTCAGCGGCGGACGGGTGAGTAATGCCTAGGAATCTGCCTGGTAGTGGGGGACAACGTTTCGAAAGGAACGCTAATACCGCATACGTCCTACGGGAGAAAGCAGGGGACCTTCGGGCCTTGCGCTATCAGATGAGCCTAGGTCGGATTAGCTAGTTGGTGAGGTAATGGCTCACCAAGGCGACGATCCGTAACTGGTCTGAGAGGATGATCAGTCACACTGGAACTGAGACACGGTCCAGACTCCTACGGGAGGCAGCAGTGGGGAATATTGGACAATGGGCGAAAGCCTGATCCAGCCATGCCGCGTGTGTGAAGAAGGTCTTCGGATTGTAAAGCACTTTAAGTT…
	F3-10	Rapid Flask Culturing	Acinetobacter sp.	99.68	PQ236916.1	GGGGAGGGGCGGCTTAACCATGCAAGTCGAGCGGAGAGAGGTAGCTTGCTACTGATCTTAGCGGCGGACGGGTGAGTAATGCTTAGGAATCTGCCTATTAGTGGGGGACAACATTTCGAAAGGAATGCTAATACCGCATACGTCCTACGGGAGAAAGCAGGGGATCTTCGGACCTTGCGCTAATAGATGAGCCTAAGTCGGATTAGCTAGTTGGTGGGGTAAAGGCCTACCAAGGCGACGATCTGTAGCGGGTCTGAGAGGATGATCCGCCACACTGGGACTGAGACACGGCCCAGACTCCTACGGGAGGCAGCAGTGGGGAATATTGGACAATGGGCGGAAGCCTGATCCAGCCATGCCGCGTGTGTGAAGAAGGCCTTATGGTTGTAAAGCACTTTA…
	F3-11	Rapid Flask Culturing	Pseudomonas sp.	98.72	MN493896.1	GGGAAGGGGCGGCCTACCCATGCAAGTCGAGCGGATGAGAAGAGCTTGCTCTTCGATTCAGCGGCGGACGGGTGAGTAATTGCCTAGGAATCTGCCTGGTAGTGGGGGACAACGTTTCGAAAGGAACGCTAATACCGCATACGTCCTACGGGAGAAAGCAGGGGACCTTCGGGCCTTGCGCTATCAGATGAGCCTAGGTCGGATTAGCTAGTTGGTGAGGTAATGGCTCACCAAGGCGACGATCCGTAACTGGTCTGAGAGGATGATCAGTCACACTGGAACTGAGACACGGTCCAGACTCCTACGGGAGGCAGCAGTGGGGAATATTGGACAATGGGCGAAAGCCTGATCCAGCCATGCCGCGTGTGTGAAGAAGGTCTTCGGATTGTAAAGCACTTT…
	F3-12	Rapid Flask Culturing	Stenotrophomonas sp.	98.6	OK299089.1	GGGGAGCGAGCTACCTGCAGTCGAACGGCAGCACAGTAAGAGCTTGCTCTTACGGGTGGCGAGTGGCGGACGGGTGAGGAATACATCGGAATCTACTTTTTCGTGGGGGATAACGTAGGGAAACTTACGCTAATACCGCATACGACCTACGGGTGAAAGCAGGGGATCTTCGGACCTTGCGCGATTGAATGAGCCGATGTCGGATTAGCTAGTTGGCGGGGTAAAGGCCCACCAAGGCGACGATCCGTAGCTGGTCTGAGAGGATGATCAGCCACACTGGAACTGAGACACGGTCCAGACTCCTACGGGAGGCAGCAGTGGGGAATATTGGACAATGGGCGCAAGCCTGATCCAGCCATACCGCGTGGGTGAAGAAGGCCTTCGGGTTGTAAAGCCCCT…

## Sheet: curA_NDOR
Year	Isolate ID	Source	Species Match	curA/NDOR	% Identity to curA	NCBI Reference Match (curA)	curA/NDOR Nucleotide Sequence
2020	tur1	Winogradsky Column #1	Chryseobacterium sp.	curA	100	WP_248901838.1	AGCGGATGGCAAGACTATGACATATCCAGTGGTGATGATCTGGTGAAACTTGGCGATCATCCGCAAAATCCATCGTGGTCGCTGGGTGTGCTAGGGATGCCAGGCTTTACCGCTTATATGGGCCTACTGGATATCGGTCAGCCTAAAGAGGGCGAAACGTTGGTGGTAGCTGCGGCGACAGGACCAGTGGGGGCGACGGTGGGGCAAATCGGCAAACTTAAAGGTTGCAGAGTGGTGGGGGTAGCCGGTGGCGCGGAAAAATGCCGCCATGCTACCGAGGTGTTAGGCTTCGATGTTTGTCTTGATCACCACGCGGATGATTTTGCCGAACAACTGGCGAAAGCGTGCCCAAAAGGTATTGATATCTATTATGAAAACGTGGGCGGTAAGGTATTCGAT…
2022	A1	Winogradsky Column #3	Enterobacter mori	curA	91.49	VAK75394.1	AGCCGCGTTGAACCAGTTCAAATTCATTCCCGAACTTCAAAGCCCGGAGAGTGGGTGCTTGGGCTACAGGCGGCTGGCAGGAGTATGAACTCTCAGACGGCAGGCGGCCTGGTGGAAGCTGGGGCGAAAATCCGTCCACACCCCTTTCCTGGGCGCCTGGGTATTCTGGGCCATGCCCGGGCTTTTACCCGCCCTATATGGGGTTGCTGGATATCGGGGCAGCCCAAAAGCGGGTGAAACGCTGGTGGTCGCCGCGGCGACGGGCCCGGGTTGGCGCGACCGTCGGGCAGATCGGTAAAATCAAAGGTTGCCGGTGTGGTCGGCGTCGCCGGTGGCGCTAAAAAATGCCGCCATGCCGTTGAGGTTCTCGGGCTTTGACCTGTGTCTGGATCATCACGC…
	B1	Winogradsky Column #3	Serratia marcescens	NDOR	48.51	WP_322426528.1	AGCGCAGCGGCGCCGGCATTCCGAAAACCGGCCGATTTCATTGGCAGGGACAATGCCGATCAGCGCTTGTTTCCACGTCCACCACTTCCTCGGTATCCAATGGAATACCTCGAAAGCATTCTTGAAACCGGAACCGCGGGGGCCGAAGCTGACCATCATGACGGCTTGCCACGTGCAAGGTCTGGGGCTGTACCTTACGGACCGGGGACCCACTGGCATAGTTGTCCAGTATGCTGGGGGCCGCATACATGGCGGCGGAAGCGATCTGCACGAAACCCTGCTAAGGGGGGGGCACATTGGATACCCTGGCCTGCTGGGACTGAAACGCATGCGCCCGGTCGCCTAGTTGATCCAGCACCGGATCCTGCCCGTGCTGTAGGCTGCTGGGGTGGGCTGGAT…
	D1	Winogradsky Column #3	Enterobacter sp.	NDOR	80.53	VAF75397.1	AGCGGCTGGCAGGAGTATGAACTTTCGGACGGCACTGGCCTGGTGAAGCTGGGCGACAATCCGCCTCATCCTTCCTGGTCGCTGGGCGTATTGGGCATGCCGGGCTTTACCGCCTATATGGGGCTGCTGGATATCGGGCAACCGAAAGCGGGTGAAACGCTGGTCGTGGCTGCGGCGACCGGCCCGGTTGGCGCGACAGTAGGGCAGATCGGCAAAATCAAAGGTTGCCGGGTGGTCGGCGTAGCTGGTGGCCCAGAGAAATGCCGCCATGCCGTTGAGGTTCTCGGCTTTGACCTGTGTCTGGATCACCATGCGGCGGATTTTGCCGACCAGCTGAAACACGCCTGTCCGAACGGTATTGATGTCTATTATGAAAACGTCGGCGGGAAAGTGTTTGAT…
	F1	Winogradsky Column #3	Pantoea sp.	NDOR	77.82	WP_241366789.1	AGCGCTGTCGATGGATCCATTATATATAGGTAGCATGAGCGACGCGCCCTCCTATTCACCGCCGGTTGAGATCGGTGCCGTGATGGTGGGGGGAACGGTCATCCGCGGTGAGCAGTCAAACCATCCCGACTTCAAAGCCGGTGAATGGGTGGTGGGCTACAGCGGCTGGCAGGAGTATGAACTTTCGGACGGCAGCGGCCTGGTGAAGCTAGGGGACAATCCGCCTCATCCTTCCTGGTCGCTGGGCGTATTGGGCATGCCGGGCTTTACCGCCTATATGGGGGTGGTGGATATCGGGCAACCGAAAGCGGGTGAAACGCTGGTTGTGGGTGCGGCGACCGGCCCGGTTGGCGCGACAGTAGGGCAGATCGGCAAAATCAAAGGTTGCCGGGTGGTTGG…
	H1	Winogradsky Column #3	Klebsiella oxytoca	curA	99.15	WP_248901838.1	AGCGGATGGCAAGACTATGACATATCCAGTGGTGATGATCTGGTGAAACTTGGCGATCATCCGCAAAATCCATCGTGGTCGCTGGGTGTGCTAGGGATGCCAGGCTTTACCGCTTATATGGGCCTACTGGATATCGGTCAGCCTAAAGAGGGCGAAACGTTGGTGGTAGCTGCGGCGACAGGACCAGTGGGGGCGACGGTGGGGCAAATCGGCAAACTTAAAGGTTGCAGAGTGGTGGGGGTAGCCGGTGGCGCGGAAAAATGCCGCCATGCTACCGAGGTGTTAGGCTTCGATGTTTGTCTTGATCACCACGCGGATGATTTTGCCGAACAACTGGCGAAAGCGTGCCCAAAAGGTATTGATATCTATTATGAAAACGTGGGCGGTAAGGTATTCGAT…
2025	F1-1	Rapid Flask Culturing	Pseudomonas sp.	NDOR	88.41	HCJ8625988.1	AGCGATGAGCCATCTTATTCACCGCCGGTTGATATTGGCGGCGTGATGGTCGGCGGTACGGTGAGCCGGGTTGAAGACTCCCATCATCCCGATTATCAACCTGGCGACTGGGTGCTGGGCTACAGCGGATGGCAGGACTATGACATATCCGGCGGCGATGATCTGGTGAAACTGGGCGACCAACCGCAACATCCTTCGTGGTCGCTGGGAGTACTGGGAATGCCTGGGTTTACCGCCTATATGGGGCTGCTGGATATCGGTCAGCCTAAAGACGGCGAAACGCTGGTGGTGGCTGCCGCGACCGGTCCAGTGGGCGCCACGGTCGGTCAGATCGCCAAACTCAAAGGCTGCCGTACGGTGGGGGTTGCCGGAGGCGCGGAGAAATGCCGCTACGCGGTA…
	F1-2	Rapid Flask Culturing	Acinetobacter sp.	curA	99.28	WP_250555739.1	AGCGATGAGCCATCTTATTCACCGCCGGTTGATATTGGCGGCGTGATGGTCGGCGGCACGGTGAGCCGTGTTGTGGAGTCGAATCATCCTGATTATCAGCCTGGCGACTGGGTGCTGGGCTACAGTGGATGGCAGGACTATGACATATCCAGTGGTGATGATCTGGTGAAACTTGGCGATCATCCGCAAAATCCATCGTGGTCGCTGGGTGTGCTGGGGATGCCAGGCTTTACCGCTTATATGGGGCTGCTGGATATCGGTCAGCCTAAAGAGGGCGAAACGTTGGTGGTAGCTGCGGCGACAGGTCCTGTGGGAGCAACGGTGGGGCAAATCGGCAAACTTAAAGGTTGCAGGGTGGTGGGGGTTGCCGGTGGCGCGGAAAAATGCCGCCATGCTATC…
	F1-3	Rapid Flask Culturing	Raoultella sp.	NDOR	81.16	EIB9637960.1	AGCGATGAGCCATCTTATTCACCGCCGGTTGATATTGGCGGCGTGATGGTCGGCGGTACGGTGAGCCGGGTTGAAGTCTCCCATCACGCCGATTTTAAAGCTGGCGAATGGGTGCTGGGCTACAGCGGCTGGCAGGACTATGAGCTTTCCGACGGCAGCGGGCTGGTGAAGTTGGGCACCAACCCGCAGCATCCTTCCTGGGCGCTTGGAGTACTGGGAATGCCTGGGTTTACCGCCTATATGGGGCTGCTGGATATCGGTCAGCCGAAAGCCGGTGAAACGCTGGTGGTGGCTGCCGCGACCGGGCCAGTAGGCGCCACGGTCGGTCAGATTGCCAAACTCAAAGGCTGCCGTACGGTGGGGGTTGCCGGAGGCAGCGAGAAATGCCGCTACGCGGTA…
	F1-4	Rapid Flask Culturing	Leclercia adecarboxylata	curA	98.91	WP_250555739.1	AGCGATGAGCCATCTTATTCACCGCCGGTTGATATTGGCGGCGTGATGGTCGGCGGCACGGTGAGCCGTGTTGTGGAGTCGAATCATCCTGATTATCAGCCTGGCGACTGGGTGCTGGGCTACAGTGGATGGCAGGACTATGACATATCCAGTGGTGATGATCTGGTGAAACTTGGCGATCATCCGCAAAATCCATCGTGGTCGCTGGGTGTGCTGGGGATGCCAGGCTTTACCGCTTATATGGGGCTGCTGGATATCGGTCAGCCTAAAGAGGGCGAAACGTTGGTGGTAGCTGCGGCGACAGGTCCTGTGGGAGCAACGGTGGGGCAAATCGGCAAACTTAAAGGTTGCAGGGTGGTGGGGGTTGCCGGTGGCGCGGAAAAATGCCGCCATGCTATC…
	F1-6	Rapid Flask Culturing	Enterobacter sp.	curA	98.55	WP_250555739.1	AGCGATGAGCCATCTTATTCACCGCCGGTTGATATTGGCGGCGTGATGGTCGGCGGCACGGTGAGCCGTGTTGTGGAGTCGAATCATCCTGATTATCAGCCTGGCGACTGGGTGCTGGGCTACAGTGGATGGCAGGACTATGACATATCCAGTGGTGATGATCTGGTGAAACTTGGCGATCATCCGCAAAATCCATCGTGGTCGCTGGGTGTGCTGGGGATGCCAGGCTTTACCGCTTATATGGGGCTGCTGGATATCGGTCAGCCTAAAGAGGGCGAAACGTTGGTGGTAGCTGCGGCGACAGGTCCTGTGGGAGCAACGGTGGGGCAAATCGGCAAACTTAAAGGTTGCAGGGTGGTGGGGGTTGCCGGTGGCGCGGAAAAATGCCGCCATGCTATC…
	F1-7	Rapid Flask Culturing	Raoultella sp.	NDOR	83.33	HCO7862158.1	AGCGATGAGCCATCTTATTCACCGCCGGTTGATATTGGCGGCGTGATGGTCGGCGGTACGGTGAGCCGGGTTGAAGTCTCCCATCACGCCGATTATTAAGCTGGCGAATGGGTGCTGGGCTACAGCGGCTGGCAGGACTATGAGCTTTCCGACGGCAGCGGGCTGGTGAAGTTGGGCGACCAACCCGCAGCATCCTTCCTGGGCGCTTGGAGTACTGGGAATGCCTGGGTTTACCGCCTATATGGGGCTGCTGGATATCGGTCAGCCGAAAGCCGGTGAAACGCTGGTGGTGGCTGCCGCGACCGGGCCAGTAGGCGCCACGGTCGGTCAGATTGCCAAACTCAAAGGCTGCCGTACGGTGGGGGTTGCCGGAGGCAGCGAGAAATGCCGCTACGCGGT…
	F1-10	Rapid Flask Culturing	Pseudomonas sp.	NDOR	80.8	EIB9637960.1	AGCGATGAGCCATCTTATTCACCGCCGGTTGATATTGGCGGCGTGATGGTCGGCGGTACGGTGAGCCGTGTTGAAGTCTCCCATCACGCTGATTTTAAAGCTGGTGAATGGGTACTGGGCTATAGCGGCTGGCAGGACTATGAACTCTCCGACGGGAGCGGGCTGGTAAAGCTGGGCACCGACCCGCAGCATCCTTCCTGGGCGCTGGGGGTACTCGGCATGCCTGGGTTTACCGCCTATATGGGGCTACTGGATATCGGTCAGCCTAAGGCCGGTGAAACGCTGGTGGTGGCTGCCGCGACCGGGCCAGTAGGCGCCACGGTCGGGCAGATTGCCAAACTCAAAGGCTGCCGTACGGTGGGGATCGCCGGGGGCAGCGAAAAATGTCGCTACGCGGTG…
	F1-11	Rapid Flask Culturing	Pseudomonas putida	NDOR	81.88	EIB9637960.1	AGCGATGAGCCATCTTATTCACCGCCGGTTGATATTGGCGGCGTGATGGTCGGCGGTACGGTGAGCCGGGTTGAAGTCTCCCATCACGCCGATTTTAAAGCTGGCGAATGGGTGCTGGGCTACAGCGGCTGGCAGGACTATGAGCTTTCCGACGGCAGCGGGCTGGTGAAGTTGGGCACCAACCCGCAGCATCCTTCCTGGGCGCTTGGAGTACTGGGAATGCCTGGGTTTACCGCCTATATGGGGCTGCTGGATATCGGTCAGCCGAAAGCCGGTGAAACGCTGGTGGTGGCTGCCGCGACCGGGCCAGTAGGCGCCACGGTCGGTCAGATTGCCAAACTCAAAGGCTGCCGTACGGTGGGGGTTGCCGGAGGCAGCGAGAAATGCCGCTACGCGGTA…
	F2-1	Rapid Flask Culturing	Raoultella ornithinolytica	curA	98.11	WP_250555739.1	AGCGATGAGCCATCTTATTCACCGCCGGTTGATATTGGCGGCGGTGATGGTCGGCGGCACGGTGAGCCGTGTTGTGGAGTCGAATCATCCTGATTATCAGCCTGGCGACTGGGTGCTGGGCTACAGTGGATGGCAGGACTATGACATATCCAGTGGTGATGATCTGGTGAAACTTGGCGATCATCCGCAAAATCCATCGTGGTCGCTGGGTGTGCTGGGGATGCCAGGCTTTACCGCTTATATGGGGCTGCTGGATATCGGTCAGCCTAAAGAGGGCGAAACGTTGGTGGTAGCTGCGGCGACAGGTCCTGTGGGAGCAACGGTGGGGCAAATCGGCAAACTTAAAGGTTGCAGGGTGGTGGGGGTTGCCGGTGGCGCGGAAAAATGCCGCCATGCTAT…
	F2-5	Rapid Flask Culturing	Enterobacter asburiae	curA	97.36	WP_250555739.1	AGCGATGAGCCATCTTATTCACCGCCGGTTGATATTGGCGGCGGTGATGGTCGGCGGCACGGTGAGCCGTGTTGTGGAGTCGAATCATCCTGATTATCAGCCTGGCGACTGGGTGCTGGGCTACAGTGGATGGCAGGACTATGACATATCCAGTGGTGATGATCTGGTGAAACTTGGCGATCATCCGCAAAATCCATCGTGGTCGCTGGGTGTGCTGGGGATGCCAGGCTTTACCGCTTATATGGGGCTGCTGGATATCGGTCAGCCTAAAGAGGGCGAAACGTTGGTGGTAGCTGCGGCGACAGGTCCTGTGGGAGCAACGGTGGGGCAAATCGGCAAACTTAAAGGTTGCAGGGTGGTGGGGGTTGCCGGTGGCGCGGAAAAATGCCGCCATGCTAT…
	F2-7	Rapid Flask Culturing	Raoultella sp.	NDOR	78.49	EIB9637960.1	AGCGATGAGCCATCTTATTCACCGCCGGTTGATATTGGCGGCGGTGATGGTCGGCGGTACGGTGAGCCGTGTTGAAGTCTCCCATCACGCTGATTTTAAAGCTGGTGAATGGGTACTGGGCTATAGCGGCTGGCAGGACTATGAACTCTCCGACGGGAGCGGGCTGGTAAAGCTGGGCACCGACCCGCAGCATCCTTCCTGGGCGCTGGGGGTACTCGGCATGCCTGGGTTTACCGCCTATATGGGGCTACTGGATATCGGTCAGCCGAAGGCCGGTGAAACGCTGGTGGTGGCTGCCGCGACCGGGCCAGTAGGCGCCACGGTCGGGCAGATTGCCAAACTCAAAGGCTGCCGTACGGTGGGGATCGCCGGGGGCAGCGAAAAATGTCGCTACGCGGT…
	F2-8	Rapid Flask Culturing	Pseudomonas sp.	curA	96.43	WP_250555739.1	AGCGATGAGCCATCTTATTCACCGCCGGTTGATATTGGCGGCGTGATGGTCGGCGGCACGGTGAGCCGTGTTCGTGGAGTCGAATCATCCTGATTATCAGCCTGGCGACTGGGTGCTGGGCTACAGTGGATGGCAGGACTATGACATATCCAGTGGTGATGATCTGGTGAAACTTGGCGATCATCCGCAAAATCCATCGTGGTCGCTGGGTGTGCTGGGGATGCCAGGCTTTACCGCTTATATGGGGCTGCTGGATATCGGTCAGCCTAAAGAGGGCGAAACGTTGGTGGTAGCTGCGGCGACAGGACCTGTGGGAGCAACGGTGGGGCAAATCGGCAAACTTAAAGGTTGCAGGGTGGTGGGGGTTGCCGGTGGCGCGGAAAAATGCCGCCATGCTAT…
	F2-9	Rapid Flask Culturing	Acinetobacter sp.	NDOR	85.02	EIB9637960.1	AGCGATGAGCCATCTTATTCACCGCCGGTTGATATTGGCGGCGTGATGGTCGGCGGCACGGTGAGCCGTGTTGTGGAGTCGAATCATCCTGATTATCAGCCTGGCGACTGGGTGCTGGGCTACAGTGGATGGCAGGACTATGACATATCCAGTGGTGATGATCTGGTGAAACTTGGCGATCATCCGCAAAATCCATCGTGGTCGCTGGGTGTGCTGGGGATGCCAGGCTTTACCGCTTATATGGGGCTGCTGGATATCGGTCAGCCTAAAGAGGGCGAAACGTTGGTGGTAGCTGCGGCGACAGGTCCTGTGGGAGCAACGGTGGGGCAAATCGGCAAACTTAAAGGTTGCAGGGTGGTGGGGGTTGCCGGTGGCGCGGAAAAATGCCGCCATGCTATC…
	F3-1	Rapid Flask Culturing	Acinetobacter calcoaceticus	curA	98.55	WP_250555739.1	AGCGATGAGCCATCTTATTCACCGCCGGTTGATATTGGCGGCGTGATGGTCGGCGGCACGGTGAGCCGTGTTGTGGAGTCGAATCATCCTGATTATCAGCCTGGCGACTGGGTGCTGGGCTACAGTGGATGGCAGGACTATGACATATCCAGTGGTGATGATCTGGTGAAACTTGGCGATCATCCGCAAAATCCATCGTGGTCGCTGGGTGTGCTGGGGATGCCAGGCTTTACCGCTTATATGGGGCTGCTGGATATCGGTCAGCCTAAAGAGGGCGAAACGTTGGTGGTAGCTGCGGCGACAGGTCCTGTGGGAGCAACGGTGGGGCAAATCGGCAAACTTAAAGGTTGCAGGGTGGTGGGGGTTGCCGGTGGCGCGGAAAAATGCCGCCATGCTATC…
	F3-2	Rapid Flask Culturing	Acinetobacter calcoaceticus	curA	98.91	WP_250555739.1	AGCGATGAGCCATCTTATTCACCGCCGGTTGATATTGGCGGCGTGATGGTCGGCGGCACGGTGAGCCGTGTTGTGGAGTCGAATCATCCTGATTATCAGCCTGGCGACTGGGTGCTGGGCTACAGTGGATGGCAGGACTATGACATATCCAGTGGTGATGATCTGGTGAAACTTGGCGATCATCCGCAAAATCCATCGTGGTCGCTGGGTGTGCTGGGGATGCCAGGCTTTACCGCTTATATGGGGCTGCTGGATATCGGTCAGCCTAAAGAGGGCGAAACGTTGGTGGTAGCTGCGGCGACAGGTCCTGTGGGAGCAACGGTGGGGCAAATCGGCAAACTTAAAGGTTGCAGGGTGGTGGGGGTTGCCGGTGGCGCGGAAAAATGCCGCCATGCTATC…
	F3-3	Rapid Flask Culturing	Raoultella ornithinolytica	NDOR	74.1	HCS3266669.1	AGCGATGAGCCATCTTATTCACCGCCGGTTGATATTGGCGGCGTGATGGTCGGCGGTACGGTGAGCCGTGTTGAAGTCTCCCATCACGCTGATTTTAAAGCTGGTGAATGGGTACTGGGCTATAGCGGCTGGCAGGACTATGAACTCTCCGACGGGAGCGGGCTGGTAAAGCTGGGCACCGACCCGCAGCATCCTTCCTGGGCGCTGGGGGTACTCGGCATGCCTGGGTTTACCGCCTATATGGGGCTACTGGATATCGGTCAGCCGAAGGCCGGTGAAACGCTGGTGGTGGCTGCCGCGACCGGGCCAGTAGGCGCCACGGTCGGGCAGATTGCCAAACTCAAAGGCTGCCGTACGGTGGGGATCGCCGGGGGCAGCGAAAAATGTCTCTACACGGTG…
	F3-4	Rapid Flask Culturing	Pseudomonas putida	curA	98.55	WP_250555739.1	AGCGATGAGCCATCTTATTCACCGCCGGTTGATATTGGCGGCGTGATGGTCGGCGGCACGGTGAGCCGTGTTGTGGAGTCGAATCATCCTGATTATCAGCCTGGCGACTGGGTGCTGGGCTACAGTGGATGGCAGGACTATGACATATCCAGTGGTGATGATCTGGTGAAACTTGGCGATCATCCGCAAAATCCATCGTGGTCGCTGGGTGTGCTGGGGATGCCAGGCTTTACCGCTTATATGGGGCTGCTGGATATCGGTCAGCCTAAAGAGGGCGAAACGTTGGTGGTAGCTGCGGCGACAGGTCCTGTGGGGGCAACGGTGGGGCAAATCGGCAAACTTAAAGGTTGCAGGGTGGTGGGGGTTGCCGGTGGCGCGGAAAAATGCCGCCATGCTATC…
	F3-6	Rapid Flask Culturing	Acinetobacter sp.	curA	98.91	WP_250555739.1	AGCGATGAGCCATCTTATTCACCGCCGGTTGATATTGGCGGCGTGATGGTCGGCGGCACGGTGAGCCGTGTTGTGGAGTCGAATCATCCTGATTATCAGCCTGGCGACTGGGTGCTGGGCTACAGTGGATGGCAGGACTATGACATATCCAGTGGTGATGATCTGGTGAAACTTGGCGATCATCCGCAAAATCCATCGTGGTCGCTGGGTGTGCTGGGGATGCCAGGCTTTACCGCTTATATGGGGCTGCTGGATATCGGTCAGCCTAAAGAGGGCGAAACGTTGGTGGTAGCTGCGGCGACAGGACCTGTGGGAGCAACGGTGGGGCAAATCGGCAAACTTAAAGGTTGCAGGGTGGTGGGGGTTGCCGGTGGCGCGGAAAAATGCCGCCATGCTATC…
	F3-7	Rapid Flask Culturing	Acinetobacter sp.	curA	98.91	WP_250555739.1	AGCGATGAGCCATCTTATTCACCGCCGGTTGATATTGGCGGCGTGATGGTCGGCGGCACGGTGAGCCGTGTTGTGGAGTCGAATCATCCTGATTATCAGCCTGGCGACTGGGTGCTGGGCTACAGTGGATGGCAGGACTATGACATATCCAGTGGTGATGATCTGGTGAAACTTGGCGATCATCCGCAAAATCCATCGTGGTCGCTGGGTGTGCTGGGGATGCCAGGCTTTACCGCTTATATGGGGCTGCTGGATATCGGTCAGCCTAAAGAGGGCGAAACGTTGGTGGTAGCTGCGGCGACAGGTCCTGTGGGGGCAACGGTGGGGCAAATCGGCAAACTTAAAGGTTGCAGGGTGGTGGGGGTTGCCGGTGGCGCGGAAAAATGCCGCCATGCTATC…
	F3-8	Rapid Flask Culturing	Acinetobacter sp.	curA	98.91	WP_250555739.1	AGCGATGAGCCATCTTATTCACCGCCGGTTGATATTGGCGGCGTGATGGTCGGCGGCACGGTGAGCCGTGTTGTGGAGTCGAATCATCCTGATTATCAGCCTGGCGACTGGGTGCTGGGCTACAGTGGATGGCAGGACTATGACATATCCAGTGGTGATGATCTGGTGAAACTTGGCGATCATCCGCAAAATCCATCGTGGTCGCTGGGTGTGCTGGGGATGCCAGGCTTTACCGCTTATATGGGGCTGCTGGATATCGGTCAGCCTAAAGAGGGCGAAACGTTGGTGGTAGCTGCGGCGACAGGACCTGTGGGAGCAACGGTGGGGCAAATCGGCAAACTTAAAGGTTGCAGGGTGGTGGGGGTTGCCGGTGGCGCGGAAAAATGCCGCCATGCTATC…

## Sheet: synteny genes
Year	Isolate ID	Source	Species Match	Gene Match	Nucleotide Sequence
2020	tur1	Winogradsky Column #1	Chryseobacteruim sp.	curA	AGCGGATGGCAAGACTATGACATATCCAGTGGTGATGATCTGGTGAAACTTGGCGATCATCCGCAAAATCCATCGTGGTCGCTGGGTGTGCTAGGGATGCCAGGCTTTACCGCTTATATGGGCCTACTGGATATCGGTCAGCCTAAAGAGGGCGAAACGTTGGTGGTAGCTGCGGCGACAGGACCAGTGGGGGCGACGGTGGGGCAAATCGGCAAACTTAAAGGTTGCAGAGTGGTGGGGGTAGCCGGTGGCGCGGAAAAATGCCGCCATGCTACCGAGGTGTTAGGCTTCGATGTTTGTCTTGATCACCACGCGGATGATTTTGCCGAACAACTGGCGAAAGCGTGCCCAAAAGGTATTGATATCTATTATGAAAACGTGGGCGGTAAGGTATTCGAT…
				mddA	CCGCCATCGGTGAAATCTACAACCACGCGGTGCTGCACACCGCCGCGATCTGGAATGATGCCACGGTCGATACCGATAACCGTATCGCCTGGTTCGAAGCGCGCCAGCTGATGGGCTATCCGGTGCTGGTCAGCGAAGAGGATGGCGTGGTGACCGGTTACGCCTCGTTCGGAGACTGGCGCGCCTTTGACGGTTTTCGTCACACCGTGGAGCACTCGGTGTATGTTCATCCGGATCATCAGGGCAAAGGCATTGGCCGCGAGCTGATGAAGGCCCTGATCGCAGAAGCCCGCCACATCGGCAAACACGTGATGGTGGCGGGGATAGAAGCGCAGAACAGTGCCTCTATTCATCTCCATGAGACCCTGGGCTTCGTCACTACCGGTCAGATGCCGCAGG…
				ydcZ	TGAATCAGTCGCTGACGCTGGTGTTTCTGGTGGCGGCAGGCATTGGTCTGGTGGTGCAGAACACCCTGATGGTACGTATTACACAGACTTCGAGCACCATTCTGATCGCCATGCTGCTCAACTCGCTGGTGGGGATTGTGCTGTTTGTGTCGATCCTGCTGATTAAAAACGGCGTCGCCGGGTTCAGCGAGCTGGTGCATACGGTGCGCTGGTGGACCCTGATCCCCGGCCTGCTGGGG
				ydcY	ATGTCACATTTAGAGGAAGTTATCGCCCGCGTTGACGCCGCGGTAGAGGAAAGCGTGATCGTTCATATGAACGAGTTGCTGATCGAACTCAGCGAAGACACCGGGTTAAGCCGGGAAGATCGCTATACCCAGCAGCAGCGTCTTCGCACGACTATTGCCCATCACGGCAAACACTACAAAGAGGAGCAGGAAGCCCGCGAAGAGAGCCTGACCAAAGGCGGCGTGATCC
				patD	ATTGCCCCCTGGAACTACCCGCTGATGATGGCGGCGTGGAAGCTGGCGCCGGCGCTGGCCGCCGGGAACTGCGTGGTGCTGAAACCCTCTGAGATCACGCCGCTTACCGCCCTTAAGCTGGCGGAGCTGGCACAAGGGATCTTTCCGGCCGGGGTGCTCAACGTGCTTTTCGGGCGGGGTAAAACCGTCGGCGACCCGCTCACCGGACATGAAAAGGTGCGGATGGTGTCCCTCACCGGCTCTATCGCCACGGGGGAACACATCATCGGCCATACCGCCTCGTCCATCAAGCGCACCCACATGGAGCTGGGCGGCAAAGCGCCGGTAATTGTTTTTGATGATGCGGATCTTGACGCGGTGGTGGAGGGCGTACGCACCTTCGGCTTCTACAACGCCGGT…
				mcbR	TTGACTCTGCAGGTTGAGAACGACCTGAAACATCAGCTTAGTATTGGCGCACTAAAACCTGGCGCACGCNTTAAAACTGGCCGNCAGCCTGATTACTAAAAATCTGGCGGAGCAATTAGGTATGAGTATTACACCTGTGCGTGAAGCATTATTACGTCTGGTTTCGGTGAATGCGCTTTCTGTCGCACCTGCACAAGCATTTACAGTTCCGGAAGTGGGGAAACGTCAATTAGACGAAATCAATCGGATCCGCTACGAACTGGAATTAATGGCAGTTGCTCTGGCTGTTGAAAACCTCACCCCGCAAGACCTGGCGGAACTCCAGGAATTGCTCGAGAAATTACAGCAGGCGCAAGAAAAGGGCGACATGGAACAAATCATTAATGTAAACAGGCTATT…
				yncD	CCTGTATGTGGACGGTATTCCCGCTACCATGCCCGACGGGCAAGGGCAAACATCCAACATCGATTTAAGCAGTGTGCAAAATGTGGAAGTGCTGCGTGGCCCCTTCTCTGCCCTGTATGGCAACGCGTCTGGTGGGGTAATGAATGTCACCACCCAGACCGGACAACAGCCACCAACCATTGAAGCCAGTAGTTACTACGGCAGTTTTGGCAGCTGGCGCTATGGGCTGAAAGCAACGGGCGCAACGGGAGACGGCACACAGCCCGGCGATGTCGATTACACCGTCTCAACCACGCGTTTTACGACCCACGGCTATCGTGACCATAGTGGCGCACAGAAAAATTTAGCTAATGCCAAACTGGGCGTACGCATTGATGAAGCCAGCAAATTAAGTCTGAT…
				yncE	TGCTGCGTAAAGCGGTTGGTAAAGGCGCGTATGAGATGGCCGTCAGCCAGCAGGAGAACGCGCTGTGGGTTGCCACCACGCAGAGCCGCAAAACCGATAAGGGTGGGGTGGTTTACCGTCTCGATCCGCTGACCCTGGAAGTGACGCAGGCTATTCATAGCGATCTGAAACCTTTTGGCGCCACCATCAACAACGCCACCCAGACGCTGTGGTTTGGTAACACCACCAATAGTGCGGTGACCGCCATTGACGCCAAAACCGGCGACGTGAAGGGCCGTCTGGTACTGGACGACCGTCAGCGCAGCGAAACCGTCAAACCGCTGCAGCCGCGCGAGCTGGTGGCGGACGACACCACCAACACCGTCTATATCACCGGCATCGGTAAAGAGAGCGTGATTT…
				ansP	AAACGTCGCTGGCTGAACGCCCACGAAGAGGGCTATCACAAGGCGATGGGCAACCGTCAGGTGCAGATGATCGCCATCGGCGGCGCTATCGGTACAGGGCTGTTTTTAGGTGCAGGCGCCCGCCTGCAGATGGCTGGCCCGGCCCTCGCACTGGTCTATCTGGTGTGCGGTATCTTCTCCTTCTTTATTCTGCGTGCCCTTGGCGAACTGGTACTACACCGTCCGTCCAGTGGCAGCTTCGTCTCCTACGCCCGTGAGTTCCTTGGTGAAAAAGCCGCCTATGTTGCGGGCTGGATGTACTTCGTCAACTGGGCGATGACCGGGATTGTCGATATCACCGCAGTAGCGCTGTACATGCACTACTGGGGCGCGTTTGGCGATGTCCCGCAGTGGGTGTTT…
				ortT	ATGACGTTGTACCAGAAGATGTTAATGTTTTACGCCGTCATGGCAGCTATCAGTGCGCTTATCACCTGGTTTCTCTCTAAAGATCGCAAACGCATCCGCTTCCTGAGCGCTTTTCTGGTGGGTTCCACCTGGCCGATGAGTTTTCCGGTCGCGCTGCTGATTTCTCTCTTCTAA
2020	A1	Winogradsky Column #3	Enterobacter mori	curA	AGCCGCGTTGAACCAGTTCAAATTCATTCCCGAACTTCAAAGCCCGGAGAGTGGGTGCTTGGGCTACAGGCGGCTGGCAGGAGTATGAACTCTCAGACGGCAGGCGGCCTGGTGGAAGCTGGGGCGAAAATCCGTCCACACCCCTTTCCTGGGCGCCTGGGTATTCTGGGCCATGCCCGGGCTTTTACCCGCCCTATATGGGGTTGCTGGATATCGGGGCAGCCCAAAAGCGGGTGAAACGCTGGTGGTCGCCGCGGCGACGGGCCCGGGTTGGCGCGACCGTCGGGCAGATCGGTAAAATCAAAGGTTGCCGGTGTGGTCGGCGTCGCCGGTGGCGCTAAAAAATGCCGCCATGCCGTTGAGGTTCTCGGGCTTTGACCTGTGTCTGGATCATCACGC…
				mnaT	CAGTAAAGAAGATTGCGCCGCTATCGGTGAAATATACAACCACGCGGTCCTGCATACGGCCGCCATCTGGAACGATAAAACGGTGGATACCGATAACCGAATCGCGTGGTTTGAAGCGCGCACGCTGGTGGGTTATCCCGTACTGGTCAGCGAAGACGATGGCGTGGTAACGGGATATGCCTCCTTCGGCGACTGGCGGGCGTTCGACGGTTTTCGCCACACCGTTGAGCACTCCGTCTACGTTCACCCGGACCACCAGGGTAGAGGCATCGGGCGGTTGTTGATGAAGGCATTGATTATTGAAGCGCGAAAAATTGGCAAACACGTCATGGTGGCGGGGATCGAAGCGCAAAACCATACCTCCATTCATCTTCATGAGACGCTGGGGTTTGTCACCAC…
				ydcZ	TGAATCAATCGCTCACGCTGGCGTTCCTGGTTGCTGCGGGTATTGGGCTGGTGGTGCAGAACACGCTGATGGTGCGCATCACCCAAAGCTCATCCACCATCCTCATCGCCATGCTGTTGAACTCGCTGGTTGGCATTGTACTGTTTGTCAGCATTTTGTTGATTAAGCAGGGGTTCACCGGCTTTCATGAACTGGCGTCAACGGTTCGCTGGTGGACGTTGATCCCGGGCCTGCTGGG
				ydcY	ATGTCACATTTAAACGACGTAACAGTCCGTGTGGATGCCGCCATCAAAGAGAGCTTGATTACCCACATGAACGAATTGCTGATTGAATTAAGCGATGATGCAGAGCTGAGCCGGGAAGACCGCTATACCCAGCAGCAGCGCCTGCGCACCGCGATTTCACACCACGGTAAGCAGCACAAAGAAGAGATGGATGCGCGTGAGGAACAGCTAACTAAAGGCGGCACCATACTG
				patD	ATTGCGCCGTGGAACTACCCGCTGATGATGGCTGCCTGGAAGCTGGCTCCCGCGCTGGCGGCAGGCAACTGCGTGGTGATCAAACCTTCTGAAATTACCCCGTTAACGGCCTTAAAGTTGGCCGAGCTGGCCAGAGACATCTTCCCGGCAGGCGTACTTAACGTTCTCTTTGGTCGCGGTAAAACCGTCGGCGACCCGCTCACCGGGCATGAAAAAGTCCGCATGGTCTCACTCACCGGGTCGATTGCCACGGGCGAGCATATTATCAGCCACACGGCTTCCTCAATTAAGCGCACCCATATGGAGCTGGGCGGCAAAGCACCGGTGATTGTTTTTGACGATGCCGATCTGGACGCCGTGGTGGAAGGCGTGCGCACGTTCGGTTTCTACAACGCCGGA…
				mcbR	TGAGATCAGTTTAAAAGGGGCGTTAATTACAGGCTCACTTAAACCTGGCGCTCGACTGATTACGAAAGAGATAGCCGATAAATTAGGCACCAGTATCACCCCGGTTCGCGAGGCGCTTTTACGTCTGGTATCGGCGGGGGCGCTGCACGCCACGCCGGCGCAGGCCTTCCTGGTGCCGGAGGTAACGTTAGATCGCTATAACGAGATAAATGCCATCAGAAAACAGCTGGAGCCAATGGCGGTAGCGGCAGCCTGTCAGCACATGACCGAGAGCAAGCTGGAAACGCTGCACAAGCTGTCTGGGGCCTTTCATGACGCCATGTCTAACGGCAACGTCCAGCAGGCGTTATACGCAAACCGTGTTTTCCGCTTTACGCTGTATCAGTACGCGGAGATGCC…
				yncD	CATGTACGTGGACGGTATTCCCGCGACCATGCCGGACGGACAGGGTCAGACCTCGAACATCGATCTCACCAGCGTGGATAGCGTGGAAGTGCTGCGCGGCCCCTTCTCTGCCCTTTACGGCAACGCCTCTGGTGGCGTGATTAACATTAATACGCAGACCGGCCAGCAGCCGCCGACCATTGAGGCCAGCAGCTATTACGGCAGTTACGGCACCTGGCGCTACGGCATGAAAGCCACCGGTGCGATGGGCGACGGTACGCATGCGGGCGATGTGGATTACACCGTTTCGACCACCCGCTTCACCACCCATGGCTATCGCGACCACAGCGGCGCGCGTAAGAACCTCGCCAACGCGAAGCTGGGCGTGCGTATTGATGACGTAAGCAAGCTGACGCTGAT…
				yncE	TGCGCGGTTCTCTGCTGTTAGGCTCATTATTATTCGCCGGTACGTTCCAGGCTCATGCTGCAGAAGAGATGCTGCGTAAAGCGGTCGGCAAAGGGGCTTATGAGATGGCGTTGAGCCAGCAGGAGAACGCGCTGTGGGTGGCGACATCACAAAGCCGTAAGACCGATAAAGGCGGCGTCGTTTACCGCCTTGACCCGGTCACGCTGGACGTGACGCAAGCGATCCATAGCGATCTCAAACCGTTCGGGGCAACCTTCAATAACGCCACCCAGACGCTGTGGTTGGGTAACACCATCAACGGTGCGGTGACGGCCATTGATGCCAAAACGGGGGACGTGAAAGGGCGTCTGGTACTCGACGATCGTAAACGCAGCGAAACGGTCAAACCGTTGCAGCCGC…
				ansP	AAACGTCGCTGGTTGAACTCCCACGAAGAGGGCTACCACAAAGCGATGGGCAACCGTCAGGTTCAAATGATCGCCATCGGCGGCGCTATCGGTACAGGTCTGTTTTTAGGTGCTGGCGCACGTCTGCAAATGGCGGGCCCTGCACTTGCACTGGTCTATCTGGTGTGCGGGATCTTCTCGTTCTTCATCCTTCGAGCCCTGGGCGAACTGGTACTGCACCGCCCGTCCAGCGGCAGTTTTGTCTCCTACGCTCGCGAGTTCCTCGGTGAAAAAGCCGCCTACGTGGCAGGCTGGATGTACTTCGTCAACTGGGCGATGACCGGTATCGTCGACATCACCGCCGTTGCGCTGTACATGCACTACTGGGGCGCGTTTGGCGATGTGCCGCAGTGGGTCTTT…
				ortT	ATGACGTTGTATCAAAAGATGTTGGTTTTTTACGCAATCATGGCTTCCCTCTGCGCATTAATTACCTGGTTCCTCTCCAAAGACCGCAAACGTATCCGCCTGCTCAGCGCTTTTCTGGTGGGCTCAACGTGGCCAATGAGCTTTCCCGTTGCGCTGCTGATCTCGCTTTTCTGA
				vgrG	GATGTGCTGAAATTCACCGGGCACGAGGCACTCAGCGAGTCCTTTCACTGGGACATCGACTTCACAACGCCGCAGGCGAACATTCTCCCGGAACAGGTGCTGCTGAAACACGCCACCCTGCGCATGCGCAGCGGCAAGGCGGTGCACGGCATCCTCACCCGTCTGGAGTGGATTGCCACCACCGCCGACCAGGCGCACTGGCAGGTGGTGCTCAGCTCCCGTCTGGCGCTGCTCAGCCGTACCCGCCAGTGTCGCATCTTTCAGAACCGGTCGGTGCCGGAGGTGGTGGACCAGGTCCTGCGTCAGCACGGCCTGGAGGGCGCGGATTTTGACTTCCGCCTGGAGCGCACGTACCCGGCGCGGGAGCTGATTACCCAGTGGCGGGAGACGGACCTCGAA…
				pptA	ATGCCACACGTTGATATCAAATGTTTTCCCCGCGATCTGAATGATGAACAAAAAAACGCTCTGGCGGCGGATATCGCCGAGGTGATTACGCGCCATCTGAACAGCAAAGACCGCTCCATTTCGGTGGCGCTGAATGAAGTTCAGGAAGCCGACTGGAAAGCGCAGGTCTGGGATACCGAGATCGGACCGAAGCTGGACGAGCTGATCAAGAAGCCTGGGTATTCGATGTAA
2025	F1-4	Rapid Flask Culturing	Leclercia adecarboxylata	curA	AGCGATGCGCCGTCCTACTCGCCGCCGGTGGACATCGGTGCGGTGATGGTGGGAGGCACCGTCAGCCGCGTGGAAAAGTCGAACCATCCAGACTATCAACCCGGTGAATGGGTGCTGGGCTACAGCGGCTGGCAGGACTATGAAGTCTCTGATGGCACGGGCCTGGTCAAACTGGGTGCGGATCCCGAACACCCCTCCTGGTCGTTAGGCATACTGGGGATGCCCGGCTTTACCGCCTACATGGGCCTGCTCGATATCGGCCAGCCCAAAGCGGGTGAGACGGTGGTAGTGGCTGCGGCTACCGGTCCGGTGGGGGCAACCGTCGGCCAGATTGGCAAGCTGAAAGGCTGCCGGGTGGTGGGCGTTGCCGGCGGCGCGGAAAAATGCCGTCATGCGACT…
				mnaT	CTGCAAACAAGACTGCGCGGCGATCGCCGAAATCTACAACCACGCGGTGCTGCACACCGCCGCTATCTGGAATGACAAAACCGTCGATACCGATAATCGCATCGCCTGGTTTGAAGCCCGTCGGCTGGCAGGCTTCCCGGTGCTGGTAAGTGAAGAAGACAATGTGGTGACCGGTTACTCTTCGTTCGGGGACTGGCGCTCCTTTGACGGCTTCCGCCACACCGTAGAGCACTCGGTGTATGTGCATCCCGATCATCAGGGCAAAGGTTTGGGCCGCGCCCTGCTGGTTGCGCTGATTAACGAAGCGCGTCGGCTGAACAAGCACGTGATGGTCGCCGGCATCGAAGCGCAGAACCATGCCTCTTTGCATCTGCATGAGACGCTAGGCTTTGTCACTAC…
				ydcZ	TGAATCAGTCGCTGACGCTCGCCTGTCTGATCGCCGCCGGGGTCGGTCTGGTGGTGCAGAACACGCTGATGGTGCGGATCACCCAGTCCGCCTCCACCATCCTGATTGCGATGCTGCTTAACTCGCTGGTCGGAATCGTGATTTTTGTCACTATCCTGCTGCTGCGCCACGGCGCGGCAGGCTTTCAGGAGCTGGCGGTCAGTATTAAATGGTGGACGTTGATTCCGGGCCTGCTGGGCT
				ydcY	ATGGCACATCTGGATGACGTTATTGCCCGCGTTGATGCGGCGATTGCCGAGGGGGTGATTACTCACATGAACGAGCTGCTGGTCGAGCTGAGCGACGATGCTGAGCTGAGTCGCGACGAGCGCTTTACCCAGCAGCAGCGTTTACGTACCACCATTGCGCATCACGGGCGCCAGCATCAGGAAGAGCAGGAGGCGCGTCGCGAGCAGTTGAACAAAGGTGGCGCCATTCTT
				patD	ATCGCGCCGTGGAACTACCCGCTGATGATGGCGGCGTGGAAACTGGCGCCGGCGCTGGCCGCAGGCAACTGTGTGGTGATTAAGCCGTCAGAAATCACCCCGCTGACCGCGCTGACGCTGGCAGAACTGGCAAAAGATATCTTCCCGGCCGGGGTGCTGAATGTCCTGTTTGGCCGCGGGAAAAGCGTCGGCGACCCGCTGACCGGCCACCCGAAAGTGCGCATGGTCTCGCTGACCGGGTCGATTGCTACCGGGGCGCATATTCTCGGTCATACCGCCTCTTCGATTAAACGTACCCATATGGAACTGGGTGGCAAAGCGCCGGTGATTGTCTTTGATGATGCCGATATTGACGCGGTTGTGGAGGGCGTGAGGACCTTCGGTTTTTATAACGCCGGC…
				gntR (mcbR)	TGAGCCTGACGATGCAGGTTGAGGTGAGTCTGAAAGGTGCCCTGATTGCAGGGGCCCTGAAGCCAGGCGCACGGCTCGTCACTAAAGAGATTGCGGATAAGTTAGGTACCAGTATTACTCCTGTACGTGAAGCGCTGCTGCGGTTGGTCTCCGCTGGCGCGCTGCACGCCACCCCGGCACAAGCGTTTCTGGTGCCGGAAGTCTCGCTTGAGCGTTACAACGAAGTCAATGCCATCCGTAAGGAGCTGGAGTGCATGGCCGTTGCTGCCGCCTGCGAGCAGATGTCTGATGAGCGCATCGCTACGTTGCGTACGCTCTCTGACAATTTTCATGATGCGATGAGCAGCGGCGAGGTTGAGCGTGCGCTTCACGCTAACCGGGCTTTTCGCTTCACGCTCT…
				fecA (yncD)	GCTGTACGGCAACTCCTCAGGCGGCGTGATTAACGTAACCAGCCAGACCGGCAGCCAGCCGCCGACCATCGAGGCCAGTAGCTATTACGGTAGCTTCGGCACCTGGCACTACGGTCTGAAGGCCACTGGCGCCGTCGGCGACGGCACCCACGCCGGTGACGTCGATTACACCGTGTCGACCAACCGCTTTACCACCCACGGCTATCGCGATCACAGCGGCGCGCGTAAAAATCTTGCCAACGCCAAACTCGGCGTACGTATCAACGACGTCAGCAAGCTGACCTTGCTGTTTAACAGCGTGGACATTAAAGCCAATGACGCCGGCGGTTTGAGCGAGGATGAGTGGCGGGACAACCCGCGCCAGTCGCCGCGCGGCGATCAGTACAATACCCGCAAATC…
				yncE	TGCGTCGTTCACTGTTATTAACCTCTTTACTGCTGGCAGGGAGCTTCAGCGCTCATGCGGCAGAAGAAATGCTGCGTAAAGCGGTCGGCAAGGGCGCATACGAAATGGCTTACAGCCAGCAAGAAAATGCGCTGTGGGTCGCTACCTCACAAAGCCGTTCTCTGGATAAAGGCGGGATTGTGTATCGTCTCGACCCGACCACCCTGGAGGTCACCCAGGTTATCCATAACGATCTGAAACCGTTCGGCGCGACCATCAACAACGCGACGCAAACGCTGTGGTTCGGTAATACCACCGACAGCACCGTCACCGCGATTGATGCGAAAACCGGCGCCGTCAAAGGCCGTCTGGTGCTGGACTCCCGTAAACGCAGCGAAACCGTGCGTCCGCTGGCGCCGC…
				ansP	AGGCGTCACTGGCTTAACTCTCACGAATCGGGCTATCACAAGGCCATGGGTAACCGGCAGGTGCAGATGATCGCCATCGGCGGCGCCATCGGTACCGGTCTGTTCCTCGGCGCAGGCGCGCGCTTACAGATGGCAGGGCCCGCGCTGGCGCTGGTTTATCTGGTCTGCGGCCTGTTCTCGTTCTTCATCTTACGCGCCCTCGGCGAACTGGTTCTCCACCGTCCTTCCAGCGGCAGTTTCGTCTCCTACGCCCGTGAATTTCTGGGTGAAAAAGCGGCCTACGTTGCCGGCTGGATGTACTTCGTCAACTGGGCGATGACCGGCATTGTCGACATCACCGCCGTGGCGCTGTACATGCACTACTGGGGCGCTTTCGGCGATGTCCCGCAGTGGGTATTC…
				ortT	ATGACCCTATACCAAAAAATGCTGATTTTTTACGCAGTCATGGGCTTTATCTGCGCAATTATCAGCTGGTTTTTAACCAAAGAAAGCCGTTTGATTCGCCTGCTGGCCGCACTGCTGATCGGGGCAACCTGGCCGTTTAGTTTCCCCACGGCCTTATTAGTCTCCTTATTCTGA
				yncL	ATGAGGGTCAGGATTGCGGCCAGAGAAGAGCATGTCGGCGGCGTATTGATGGCCTCTGGCGTCGTTAACGCGGTGATTGGCATGTCGCTTTGCGGATAA
				vgrG	GGGAGCATTGACGTGTACGACTGGCCGGGGCGCTTCGTCGAGCACAGTCACGGCGAGTTCTACGCCCGCATCCGCCAGGAGCGCTGGCAGGTGGAGCATCAGCAGATCCGGGCGACGGCGACGGCGATGGGGATCGCGCCCGGCGCAACCTTTACCCTGAGCAACGCGCCGTTTTTCAGCGACAACGGTGACTACCTGACCACGGTGGCGGAGTATACCTTTGAAGAAAACCGCTACGCCAGCGGCGACGGTGGGGCGACGGTACACCGCATCGACTTTACGGTGATCCCGGCATCGGTGGCCTATCGCCCGGCGCAGGCGACGGCGTGGCCGCGGACCTACGGCCCGCAGACGGCGAAGGTGGTGGGCCCGCAGGGCGAGAGCATCTGGACGGATAAA…
				rhsC	GCGCACAGACAGATGAAGGAACATTACGCCGGATGACGTTAGGCGAGATTGCAATGGCTCGCAGGGTGTTCGGTGATTCGATAGTGTATAGCCGTGTCTGGATTCATTGCGACAGTTATTTACCCTTCGGACTACAGAAACAAAACTATGCGATGACTCCCAACGGGGAGTTATGGTACAGAAAGCCGATGTATAGGGAAGACTTTTCCGCAAATTCGGTTTTCATCGAAGATAAATACGTTTTCATCCATGAACTGGGGCATGTGTGGCAACATCAGCACGGGCAATGGGTGAGAATGCGGGGCGCTTTTAGCTGGGCTGCTGAATATACCTACAGGCTGGATAAAGAAAAGCTCACTGATTACTCTCTTGAACAGCAAGCCTCTATTATAGCTGATT…
				ISAs	TATTTGCGCCGTTATTTCTGGTGCAGAAGGTTGGGAAGATATAGAGGATTTTGGGGAAACACATCTCGATTTCTTGAAGCAATATGGTGATTTTGAAAATGGTATTCCTGTTCACGATACCATTGCCAGAGTTGTATCCTGTATCAGTCCTGCAAAATTTCACGAGTGCTTTATTAACTGGATGCGTGACTGCCATTCATCAAATGATAAAGACGTCATTGCAATTGATGGAAAAACGCTCCGGCACTCTTATGACAAGAGTCGCCGCAGGGGAGCGATTCATGTCATTAGTGCGTTCTCAACAATGCACAGTCTGGTCATCGGACAGATCAAGACGGATGAGAAATCTAATGAGATTACAGCTATCCCAGAACTTCTTAACATGCTGGATATTAAAGG…
				pptA	ATGCCACATGTTGATATTAAATGTTTTCCCCGCGATCTGACCGATGAACAAAAAAGCGCATTGGCCGCCGATATCACCGACGTGCTTGTCCGTCATCTCAATAGCAAAGAGGGCGCGGTGAGCGTCGCCCTCAATCAGGTTGAGCAAAGCGACTGGCAGCAGGTCTGGGACAGCGAGATTGCCCCGCAGATGGCGCGGCTGATTAAAAAACCGGGCTACAGCATGTCGTAA
2025	F2-1	Rapid Flask Culturing	Raoultella ornithinolytica	curA	AGCGATGAGCCATCTTATTCACCGCCGGTTGATATTGGCGGCGGTGATGGTCGGCGGCACGGTGAGCCGTGTTGTGGAGTCGAATCATCCTGATTATCAGCCTGGCGACTGGGTGCTGGGCTACAGTGGATGGCAGGACTATGACATATCCAGTGGTGATGATCTGGTGAAACTTGGCGATCATCCGCAAAATCCATCGTGGTCGCTGGGTGTGCTGGGGATGCCAGGCTTTACCGCTTATATGGGGCTGCTGGATATCGGTCAGCCTAAAGAGGGCGAAACGTTGGTGGTAGCTGCGGCGACAGGTCCTGTGGGAGCAACGGTGGGGCAAATCGGCAAACTTAAAGGTTGCAGGGTGGTGGGGGTTGCCGGTGGCGCGGAAAAATGCCGCCATGCTAT…
				mddA (mnaT)	CCGCCATCGGTGAAATCTACAACCACGCGGTGCTGCACACCGCCGCGATCTGGAATGATGCCACGGTCGATACCGATAACCGTATCGCCTGGTTCGAAGCGCGCCAGCTGATGGGCTATCCGGTGCTGGTCAGCGAAGAGGATGGCGTGGTGACCGGTTACGCCTCGTTCGGAGACTGGCGCGCCTTTGACGGTTTTCGTCACACCGTGGAGCACTCGGTGTATGTTCATCCGGATCATCAGGGCAAAGGCATTGGCCGCGAGCTGATGAAGGCCCTGATCGCAGAAGCCCGCCACATCGGCAAACACGTGATGGTGGCGGGGATAGAAGCGCAGAACAGTGCCTCTATTCATCTCCATGAGACCCTGGGCTTCGTCACTACCGGTCAGATGCCGCAGG…
				ydcZ	TGAATCAGTCGCTGACGCTGGTGTTTCTGGTGGCGGCAGGCATTGGTCTGGTGGTGCAGAACACCCTGATGGTACGTATTACACAGACTTCGAGCACCATTCTGATCGCCATGCTGCTCAACTCGCTGGTGGGGATTGTGCTGTTTGTGTCGATCCTGCTGATTAAAAACGGCGTCGCCGGGTTCAGCGAGCTGGTGCATACGGTGCGCTGGTGGACCCTGATCCCCGGCCTGCTGGGGTC
				ydcY	ATGTCACATTTAGAGGAAGTTATCGCCCGCGTTGACGCCGCGGTAGAGGAAAGCGTGATCGTTCATATGAACGAGTTGCTGATCGAACTCAGCGAAGACACCGGGTTAAGCCGGGAAGATCGCTATACCCAGCAGCAGCGTCTTCGCACGACTATTGCCCATCACGGCAAACACTACAAAGAGGAGCAGGAAGCCCGCGAAGAGAGCCTGACCAAAGGCGGCGTGATCCTCTG
				patD	ATTGCCCCCTGGAACTACCCGCTGATGATGGCGGCGTGGAAGCTGGCGCCGGCGCTGGCCGCCGGGAACTGCGTGGTGCTGAAACCCTCTGAGATCACGCCGCTTACCGCCCTTAAGCTGGCGGAGCTGGCACAAGGGATCTTTCCGGCCGGGGTGCTCAACGTGCTTTTCGGGCGGGGTAAAACCGTCGGCGACCCGCTCACCGGACATGAAAAGGTGCGGATGGTGTCCCTCACCGGCTCTATCGCCACGGGGGAACACATCATCGGCCATACCGCCTCGTCCATCAAGCGCACCCACATGGAGCTGGGCGGCAAAGCGCCGGTAATTGTTTTTGATGATGCGGATCTTGACGCGGTGGTGGAGGGCGTACGCACCTTCGGCTTCTACAACGCCGGT…
				gntR (mcbR)	TGACGATGCAGGTTGAGGTGAGTCTGAAAGGTGCCCTGATTGCAGGGGCCCTGAAGCCAGGCGCACGGCTCGTCACTAAAGAGATTGCGGATAAGTTAGGTACCAGTATTACTCCTGTACGTGAAGCGCTGCTGCGGTTGGTCTCCGCTGGCGCGCTGCACGCCACCCCGGCACAAGCGTTTCTGGTGCCGGAAGTCTCGCTTGAGCGTTACAACGAAGTCAATGCCATCCGTAAGGAGCTGGAGTGCATGGCCGTTGCTGCCGCCTGCGAGCAGATGTCTGATGAGCGCATCGCTACGTTGCGTACGCTCTCTGACAATTTTCATGATGCGATGAGCAGCGGCGAGGTTGAGCGTGCGCTTCACGCTAACCGGGCTTTTCGCTTCACGCTCTATCACT…
				fecA (yncD)	CACCATGCCGGACGGCCAGGGGCAAACCTCGAATATTGATATCAACAGCCTTAAGAGCGTCGAAGTGTTGCGCGGGCCCTTCTCCGCCCTGTACGGCAACGCCTCGGGCGGCGTGGTTAACATGACCACCGAAACTGGACGTCAGCCCACCACCGTTGAGGCCAGCAGCTATTACGGCAGCTACGGCAGCTGGCGCTACGGCATGAAGGCCACCGGCGCGATGGGCGACGGCACTCAGCCAGGGGATGTGGATTACACCGTCTCCACCACCCGCTTCACCACCCACGGCTATCGCGATCACAGCGGCGCGCGTAAAAACCTCGCCAACGCCAAACTGGGCGTGCGCGTCGACGATGCCAGCAAATTGACCCTGATTTTTAACAGCGTCGATATGAAAGC…
				yncE	TGCGTGGCTCACTGCTGTTAGGTTCTCTGCTGGTCGCCGGGACCTTTAATGTTCATGCCGCAGAAGAGATGCTGCGTAAAGCGGTTGGTAAAGGCGCGTATGAGATGGCCGTCAGCCAGCAGGAGAACGCGCTGTGGGTTGCCACCACGCAGAGCCGCAAAACCGATAAGGGTGGGGTGGTTTACCGTCTCGATCCGCTGACCCTGGAAGTGACGCAGGCTATTCATAGCGATCTGAAACCTTTTGGCGCCACCATCAACAACGCCACCCAGACGCTGTGGTTTGGTAACACCACCAATAGTGCGGTGACCGCCATTGACGCCAAAACCGGCGACGTGAAGGGCCGTCTGGTACTGGACGACCGTCAGCGCAGCGAAACCGTCAAACCGCTGCAGCCGC…
				ansP	AAACGTCGCTGGCTGAACGCCCACGAAGAGGGCTATCACAAGGCGATGGGCAACCGTCAGGTGCAGATGATCGCCATCGGCGGCGCTATCGGTACAGGGCTGTTTTTAGGTGCAGGCGCCCGCCTGCAGATGGCTGGCCCGGCCCTCGCACTGGTCTATCTGGTGTGCGGTATCTTCTCCTTCTTTATTCTGCGTGCCCTTGGCGAACTGGTACTACACCGTCCGTCCAGTGGCAGCTTCGTCTCCTACGCCCGTGAGTTCCTTGGTGAAAAAGCCGCCTATGTTGCGGGCTGGATGTACTTCGTCAACTGGGCGATGACCGGGATTGTCGATATCACCGCAGTAGCGCTGTACATGCACTACTGGGGCGCGTTTGGCGATGTCCCGCAGTGGGTGTTT…
				ortT	ATGACGTTGTACCAGAAGATGTTAATGTTTTACGCCGTCATGGCAGCTATCAGTGCGCTTATCACCTGGTTTCTCTCTAAAGATCGCAAACGCATCCGCTTCCTGAGCGCTTTTCTGGTGGGTTCCACCTGGCCGATGAGTTTTCCGGTCGCGCTGCTGATTTCTCTCTTCTAA
				vgrG	GATGTGCTGAAATTCAGTTCGGTTGAATCCCTCAGCATGCCCTGGCGATATGAGATCTCCGTAACCTGCGCCACATCGGATATTGCAAGTGCAGCCGTACTGTTAAAGCCTGCAGCCTTCACGTTTCAGACCCCAGTGTTTGATGGGACATCGGCTGTTCCTGTGCGTACTGTATTTGGGGTCATAGCGTCGTTTGAGCGTATTTCCACTTCAAAAGAGGATACCGTTTACGCACTGGCGTTGGTCCCGCGTATCGCCCTGTTAGCGCAAACAAAAGGCTGCGATATTTTCCTCAATATGTCCGTGACTGAAGTCGTAGAAAAGGTGTTGTGTAAGCACGGGCTGGAAGGGGCAGACTTTGAGTTTCGTTTATCCCGTGAGTATCCGGCCCGGGAACTG…
				rhsC	GCCGCCAACTGAAGAGGGCGGGTTGAGAAGGCTTAGGTTAGGTGAGATCAATCTGGCCAGTACGCTTTACGGTTACAGCATTCATTATCATAAAGTCTGGATCCATCGTGAAAGTTATTTCCCTTTCAATCTGCAGAATCCTGGTCAGGCAATGGCGCCAGATGGTGAAATGTGGTTCAGGTCCGGAACTTATGAGCATGATTTTTCAATGCCCACAAAGGAAGATACTCCTGGTGCCCAACACCTTTTCCTGCATGAAATGATGCACGTCTGGCAGCATCAACGCGGCATGTGGGTGCGGACACGTGGTGCGTTTTCATGGATGGCGGATTATACCTACAGTCTGGATAAAGCAAAACTACTTGATTACACACTGGAGCAGCAGGCCTCTATCGTCAG…
				pptA	ATGCCACACGTTAATATCAAATGCTTCCCTCGCGACCTGAACGACGAGCAAAAAACCGCCCTGGCCGCGGATATCGCCGAGGTGATCACCCGCCATCTGAACAGTAAAGATCGCTCTATCTCCGTGGCCCTGAACGAAGTTCAGGAAGCCGACTGGAAAGCGCAGGTCTGGGATACGGAGATTGGCCCGAAGCTGGATGAGTTGATTAAGAAGCCGGGATATTCGATGTAA
2025	F3-1	Rapid Flask Culturing	Acinetobacter calcoaceticus	curA	AGCGATGAGCCATCTTATTCACCGCCGGTTGATATTGGCGGCGTGATGGTCGGCGGCACGGTGAGCCGTGTTGTGGAGTCGAATCATCCTGATTATCAGCCTGGCGACTGGGTGCTGGGCTACAGTGGATGGCAGGACTATGACATATCCAGTGGTGATGATCTGGTGAAACTTGGCGATCATCCGCAAAATCCATCGTGGTCGCTGGGTGTGCTGGGGATGCCAGGCTTTACCGCTTATATGGGGCTGCTGGATATCGGTCAGCCTAAAGAGGGCGAAACGTTGGTGGTAGCTGCGGCGACAGGTCCTGTGGGAGCAACGGTGGGGCAAATCGGCAAACTTAAAGGTTGCAGGGTGGTGGGGGTTGCCGGTGGCGCGGAAAAATGCCGCCATGCTATC…
				mddA (mnaT)	ATGACGCTAGGCCAGCTGGCCGAGGCCCTCGGTGCCACCCTCAAGGGGCCCGAGGGGTTGCAGATTACCGGACTGGCCACCTTGCAGGAGGCTGGCCCCGGTCAATTGAGCTTCCTCGCCAACCCGCAGTACCGCAAGTACCTGGATAAGTGCCAGGCGGGTGCGGTATTGCTCAAGGCTGCGGATGCCGAAAGTTTCGCTGGCAATGCCCTGATCGTGGCCGACCCGTACCAGGCGTATGCGCGTATTTCCCACCTGTTCGACCCCAAACCCAAGGCTGTGGCGGGAATCCATCCCAGCGCCGTGGTGGCTGAGGACGCGCAGGTGGACGCCAGCGCCAGCATCGGGCCGTTCGCGGTGATCGAAAGCGGTGCGCGCATCGAGGCTGATGTCAGCATC…
				ydcZ	ATGATGAAATTTTCTAGCCAATTTTTCCTATTTTTACCCTTAGCTCTGGGAATCGGTATTGCCATGGCTTTTCAAACCGCCATCAATGCACAATTGAGAGAACAATTACACACGCCCTTACAAGCAGCCCTCTTATCCTTTCTTGTAGGAACTATTGTTTTAGCAATCATGGTTTTCTTTCAAAGTGCTGAAAAGCCAACTTTAAGTGAAATATCAAATATTCCATGGATTCTATGGACTGGAGGATTTCTTGGGGTTTATGCAATTAGCATGAGCATTTATACTGCACCTAAACTTGGTTTTTTAACCTTTTCAGGTTTAGTCATTTTTGGGCAAATAGTTATTTCTATGTTACTTGATCATTTTGGTTGGTTGGGCACAGAAAAGACACCTGTTACA…
				ydcY	ATGAAAGCTATTTTATTATTTTTGATTTTTTCCTTCTCAAATACCATTGTTTTTGCTGAAGATAAAAATGATTTAAATCCTGAACCGAAATATGCGTATGCTGAAGTTTTAATTGAGGTTTATAAAGATGGACGGCATGAGGAGTATTTAAAAAAAAGCAGTGGATTTAAACATTTAGATGAGAAAATACTTAAGGCTGTAAAGGAAGCCCATTTCAAGCCAATAACCAATACAAATATAGACCGCATGTATCTAACGCAACCGTTTAAAATTGTACTTAGTGATACTGAAATTAAAAAGAATTAA
				patD	ATCGCACCCGTGAATTATCCGCTGATGATGGCAGCGTGGAAACTGGCTCCGGCGCTGGCGGCAGGGAACTGCGTAGTGCTTAAACCATCAGAAATTACCCCGCTGACCGCGTTGAAGTTGGCAGAGCTGGCGAAAGATATCTTCCCGGCAGGCGTGATTAACGTACTGTTTGGCAGAGGCAAAACGGTGGGTGATCCGCTGACCGGTCATCCCAAAGTGCGGATGGTGTCGCTGACGGGCTCTATCGCCACCGGCGAGCACATCATCAGCCATACCGCGCCGTCCATTAAGCGTACTCATATGGAACTTGGTGGCAAAGCGCCAGTGATTGTTTTTGATGATGCGGATATTGAAGCAGTGGTCGAAGGTGTACGTACATTTGGCTATTACAATGCCGGA…
				gntR (mcbR)	TCGGCCGAGCAGATCTACCCTCGGCTGTTCGACGCCATTCTCGAACAGCGCCTGCCACCGGGTGCCCTGTTGCCCGAGCAGGCGCTGGGCCATGCCTTTGGTGTCAGCCGCACCGTGATACGCCGTGTGCTTGGGCGCCTGTCCGACCAGCAGGTGGTGGTGCAGCGCCCCAGCCATACCGCGCACCTGGCCGCGCCCGACCCGGACCAGGCGCGCCAGGTGCTCAGTGCCCGGCGCCTGGCCGAAACCACACTGATCACCCTGGCTGCCCAGCGCGCCCGGCCGGCGCAGGTGCGCCAGCTGCGGCAACTGGTGGACCGCGAACGCCAGCACCATGAAAGCGGCGAACGTTGCGCGGCGATCCGCCTGGGCGGCGAGTTTCACCTCAAGCTGGCGCAG…
				fecA (yncD)	CACCATGCCGGACGGCCAGGGGCAAACCTCGAATATTGATATCAACAGCCTTAAGAGCGTCGAAGTGTTGCGCGGGCCCTTCTCCGCCCTGTACGGCAACGCCTCGGGCGGCGTGGTTAACATGACCACCGAAACTGGACGTCAGCCCACCACCGTTGAGGCCAGCAGCTATTACGGCAGCTACGGCAGCTGGCGCTACGGCATGAAGGCCACCGGCGCGATGGGCGACGGCACTCAGCCAGGGGATGTGGATTACACCGTCTCCACCACCCGCTTCACCACCCACGGCTATCGCGATCACAGCGGCGCGCGTAAAAACCTCGCCAACGCCAAACTGGGCGTGCGCGTCGACGATGCCAGCAAATTGACCCTGATTTTTAACAGCGTCGATATGAAAGC…
				yncE	TGCTAAAACAGAACAGTCCAATTCAGTCAAACAATCTTATCAGGTTGAAACTGTTGCACATTTTGATGAGCCTTGGGCAATAACAAGTTTGCCAGATCAGCGTTTATTAGTGACGGAGCGCCAAGGTAAATTAAAAATTTTTAATCCTAAAAATAAACAGATGCTGGATGTTTTAGGAGTACCTCCAGTGAGTTATGGCGGACAAGGTGGTTTGGGTGATGTAGTTTTACATCCCAACTTTGCGAAGAATCACTGGATTTATCTGAGCTATGCAACAAAAGGACAAGGTGGGTATGGAGCAGTCATTTCACGTGCAAAATTAGATTTTTCTAACCCTAATCAACCTAAACTTACAGATGTGAAGCAGATCTGGCAGCAAGTACCCAAAGTTTCAGGACA…
				ansP	AAACGTCGCTGGTTGAACTCCCACGAAGAGGGCTACCACAAAGCGATGGGCAACCGTCAGGTTCAAATGATCGCCATCGGCGGCGCTATCGGTACAGGTCTGTTTTTAGGTGCTGGCGCACGTCTGCAAATGGCGGGCCCTGCACTTGCACTGGTCTATCTGGTGTGCGGGATCTTCTCGTTCTTCATCCTTCGAGCCCTGGGCGAACTGGTACTGCACCGCCCGTCCAGCGGCAGTTTTGTCTCCTACGCTCGCGAGTTCCTCGGTGAAAAAGCCGCCTACGTGGCAGGCTGGATGTACTTCGTCAACTGGGCGATGACCGGTATCGTCGACATCACCGCCGTTGCGCTGTACATGCACTACTGGGGCGCGTTTGGCGATGTGCCGCAGTGGGTCTTT…
				ortT	ATGTCTCTCTATCAACACATGCTTGTTTTTTATGCGGTTATGGCAGCAATCGCATTTCTTATCACCTGGTTTCTTTCTCCACGATAAGAAACCGCATCCGTTTCCTTCAGCGCGTTTCTGGTGGGGGCAACATGGCCGATGAGTTTCCCGGTGGC
				ydcU	CCTTCACGTTCCAGGTCTGGGTAAGGTGTCCGGTTTCTTTTGGCGTAATCCGGGGCTGGGGCTGTTTTTGCTTTGCTGCTTGGCCCGCTAATGTGGTTTGGCATTGTCTATTTCGGCTGCGCTGCTGACACTGTTATGGCAGGGATTTTATACCTTTGACGATTTCACCATGTCGGTAACGCCGGAACTGACGCTGGCGAATATCCGTGCGCTGTTTAATCCGGCGAATTACGACATCATTCTCCGCACGCTGACTATGGCTGTGGCAGTCACTATCGCCAGCGCCATTCTGGCTTTTCCAATGGCGTGGTATATGGCGCGCTATACCAGCGGAAAAATGAAAGCTTTTTTTTATATTGCGGTAATGTTGCCGATGTGGGCGAGCTACATTGTTAAAGC…
				rhsC	GGACGAGTCGTCCGGACTGTATGACGGGGCGGCGGAATCGGTGTGGGACATGTACACCCTGCATAAGGTGGTGCCGGGCATGGTCAGCGTGCGGGACTACAACTACCGTATCGCCGGGACACCGATGGATGCCACGGTGAGCGTGCGCAGTGACGCCGTGACCACCGGGGAGCACTACCGCTACGCAGAGCCGTACCGGGAGGCCGGGGACGACACCGACCCGGAGCCCGTCACCGAATCCGGCGCCTTTTATGCCCGCATTCACCATGAGCGGGAGCTGAACGCGTCTGCCCGTATTCATCTGGAGAGTAGCGCCGCCTGCCTGCTGCCGGGTCAGGTGCTGGAGCCGCAGGGCGAGGTGATTCGTGCGCTGAAAGAAGGCGTGGTCATCACGGAGGT…
				vgrG	GTGGTGAAGGGAGGGATTGTTATCACCACGGTAAAAGCCAGCGGCTCGCGTCAGGACAGTTTCCTGATGACCTTTGAGGGTATACCGTACAGTGAAACCGTCTGTTTCCGTCCGAAACTGCTTAAACGGCCGGTGATTTCCGGCACACTTCCGGCACGTGTGGAGAGCACGCAAAAAGGTGACATCTACGCCTGGCTCGACGCGCAGGGTCGCTACCGCGTGAAGCTGGATTTTGATCGCAACAGCACCGAAAAGGGCTACGCCTACCTGTGGCTGCGGCTGGCGAAACCGTACGCTGGTGAGACTTACGGCTGGCATGCCCCGCTACTTGATGGCACGGAAGTTTCGGTGATGTTTGACAGCGGTGATCCTGACCGGCCGTATGTAGCATATGCCCAG…
				pptA	ATGCCACACGTTAATATCAAATGCTTCCCTCGCGACCTGAACGACGAGCAAAAAACCGCCCTGGCCGCGGATATCGCCGAGGTGATCACCCGCCATCTGAACAGTAAAGATCGCTCTATCTCCGTGGCCCTGAACGAAGTTCAGGAAGCCGACTGGAAAGCGCAGGTCTGGGATACGGAGATTGGCCCGAAGCTGGATGAGTTGATTAAGAAGCCGGGATATTCGATGTAA

## Sheet: RFC-1_SS
Phylogeny	Species	Protein Description	Gene	Read Counts
		type VI secretion system AAA+ family ATPase	tssH/clpV	526
		type VI secretion system tubule-forming protein VipB	vipB	351
		type VI secretion system protein IcmF1	icmF1	208
d__Bacteria;p__Proteobacteria;c__Gammaproteobacteria;o__Enterobacterales;f__Enterobacteriaceae;g__Pantoea;s__Pantoea agglomerans	Pantoea agglomerans	type VI secretion system tubule-forming protein VipB	vipB	95
d__Bacteria;p__Proteobacteria;c__Gammaproteobacteria;o__Xanthomonadales;f__Xanthomonadaceae;g__Stenotrophomonas;s__Stenotrophomonas maltophilia_AJ	Stenotrophomonas maltophilia	type VI secretion system AAA+ family ATPase	tssH/clpV	88
		type VI secretion system hcp secretion island protein HsiG1	hsiG	72
d__Bacteria;p__Proteobacteria;c__Gammaproteobacteria;o__Pseudomonadales;f__Pseudomonadaceae;g__Pseudomonas_E;s__Pseudomonas_E chlororaphis_E	Pseudomonas chlororaphis	type VI secretion system AAA+ family ATPase	tssH/clpV	63
d__Bacteria;p__Proteobacteria;c__Gammaproteobacteria;o__Enterobacterales;f__Enterobacteriaceae;g__Lelliottia;s__Lelliottia nimipressuralis	Lelliottia nimipressuralis	type VI secretion system AAA+ family ATPase	tssH/clpV	60
d__Bacteria;p__Proteobacteria;c__Gammaproteobacteria;o__Enterobacterales;f__Enterobacteriaceae;g__Pantoea;s__Pantoea eucalypti	Pantoea eucalypti	type VI secretion system tubule-forming protein VipB	vipB	57
		Type VII secretion system protein EccC3	eccC3	50
d__Bacteria;p__Proteobacteria;c__Gammaproteobacteria;o__Pseudomonadales;f__Pseudomonadaceae;g__Pseudomonas_E;s__Pseudomonas_E chlororaphis_E	Pseudomonas chlororaphis	type VI secretion system hcp secretion island protein HsiG1	hsiG	49
d__Bacteria;p__Proteobacteria;c__Gammaproteobacteria;o__Pseudomonadales;f__Pseudomonadaceae;g__Pseudomonas_E;s__Pseudomonas_E chlororaphis_E	Pseudomonas chlororaphis	type VI secretion system protein IcmF1	icmF1	46
d__Bacteria;p__Proteobacteria;c__Gammaproteobacteria;o__Pseudomonadales;f__Pseudomonadaceae;g__Pseudomonas_E;s__Pseudomonas_E putida_B	Pseudomonas putida	type VI secretion system tubule-forming protein VipB	vipB	45
d__Bacteria;p__Proteobacteria;c__Gammaproteobacteria;o__Pseudomonadales;f__Pseudomonadaceae;g__Pseudomonas_E;s__Pseudomonas_E chlororaphis_E	Pseudomonas chlororaphis	type IV secretion associated protein TagR, positively regulates PpkA	tagR	42
d__Bacteria;p__Proteobacteria;c__Gammaproteobacteria;o__Enterobacterales;f__Enterobacteriaceae;g__Lelliottia;s__Lelliottia nimipressuralis	Lelliottia nimipressuralis	type VI secretion system tubule-forming protein VipB	vipB	39
		type VI secretion system hcp secretion island protein HsiJ1	hsiJ1	38
		type VI secretion system tubule-forming protein VipA	vipA	37
d__Bacteria;p__Proteobacteria;c__Gammaproteobacteria;o__Pseudomonadales;f__Pseudomonadaceae;g__Pseudomonas_E;s__Pseudomonas_E fluorescens_AO	Pseudomonas fluorescens	type VI secretion system AAA+ family ATPase	tssH/clpV	37
d__Bacteria;p__Proteobacteria;c__Gammaproteobacteria;o__Pseudomonadales;f__Pseudomonadaceae;g__Pseudomonas_E;s__Pseudomonas_E putida_B	Pseudomonas putida	type VI secretion system hcp secretion island protein HsiG1	hsiG	37
d__Bacteria;p__Proteobacteria;c__Gammaproteobacteria;o__Burkholderiales;f__Burkholderiaceae;g__Comamonas;s__Comamonas acidovorans	Comamonas acidovorans	type VI secretion system AAA+ family ATPase	tssH/clpV	36
d__Bacteria;p__Proteobacteria;c__Gammaproteobacteria;o__Pseudomonadales;f__Pseudomonadaceae;g__Pseudomonas_E;s__Pseudomonas_E koreensis_C	Pseudomonas koreensis	type VI secretion system AAA+ family ATPase	tssH/clpV	35
		type III secretion system ATPase	tssH	34
		ESX-5 type VII secretion system FtsK/SpoIIIE family protein EccCb5	eccCb5	34
d__Bacteria;p__Proteobacteria;c__Gammaproteobacteria;o__Pseudomonadales;f__Pseudomonadaceae;g__Pseudomonas_E;s__Pseudomonas_E putida_B	Pseudomonas putida	type VI secretion system AAA+ family ATPase	tssH/clpV	34
d__Bacteria;p__Proteobacteria;c__Gammaproteobacteria;o__Enterobacterales;f__Enterobacteriaceae;g__Erwinia_B;s__Erwinia_B gerundensis	Erwinia gerundensis	type VI secretion system protein IcmF1	icmF1	33
d__Bacteria;p__Proteobacteria;c__Gammaproteobacteria;o__Pseudomonadales;f__Moraxellaceae;g__Acinetobacter;s__Acinetobacter sp004331285	Acinetobacter sp.	type VI secretion system AAA+ family ATPase	tssH/clpV	33
d__Bacteria;p__Proteobacteria;c__Gammaproteobacteria;o__Enterobacterales;f__Enterobacteriaceae;g__Lelliottia;s__Lelliottia nimipressuralis	Lelliottia nimipressuralis	type VI secretion system substrate Hcp-2	hcp2	32
d__Bacteria;p__Proteobacteria;c__Gammaproteobacteria;o__Burkholderiales;f__Burkholderiaceae;g__Comamonas;s__Comamonas tsuruhatensis	Comamonas tsuruhatensis	type VI secretion system AAA+ family ATPase	tssH/clpV	26
d__Bacteria;p__Proteobacteria;c__Gammaproteobacteria;o__Pseudomonadales;f__Pseudomonadaceae;g__Pseudomonas_E;s__Pseudomonas_E chlororaphis_E	Pseudomonas chlororaphis	type VI secretion system substrate VgrG1b	vgrG	25
		type IV secretion system virB10 protein homolog	virB	24
d__Bacteria;p__Proteobacteria;c__Gammaproteobacteria;o__Pseudomonadales;f__Pseudomonadaceae;g__Pseudomonas_E;s__Pseudomonas_E chlororaphis_E	Pseudomonas chlororaphis	type VI secretion system substrate VgrG1	vgrG	24
d__Bacteria;p__Proteobacteria;c__Gammaproteobacteria;o__Pseudomonadales;f__Pseudomonadaceae;g__Pseudomonas_E;s__Pseudomonas_E putida_B	Pseudomonas putida	type VI secretion system protein IcmF1	icmF1	24
		type III secretion system ATPase PscN	pscN	22
d__Eukaryota;p__Evosea;c__Eumycetozoa;o__unknown;f__unknown;g__Synstelium;s__Synstelium polycarpum	Synstelium polycarpum	type VI secretion system protein IcmF1	icmF1	21
		type VI secretion system substrate VgrG-2	vgrG	20
d__Bacteria;p__Proteobacteria;c__Gammaproteobacteria;o__Enterobacterales;f__Enterobacteriaceae;g__Pantoea;s__Pantoea eucrina	Pantoea eucrina	type VI secretion system AAA+ family ATPase	tssH/clpV	19
		type IV secretion associated protein TagR, positively regulates PpkA	tagR	18
		type VI secretion system protein DotU	dotU	17
d__Bacteria;p__Proteobacteria;c__Gammaproteobacteria;o__Enterobacterales;f__Enterobacteriaceae;g__Leclercia;s__Leclercia adecarboxylata_B	Leclercia adecarboxylata	type VI secretion system AAA+ family ATPase	tssH/clpV	17
d__Bacteria;p__Proteobacteria;c__Gammaproteobacteria;o__Enterobacterales;f__Enterobacteriaceae;g__Pantoea;s__Pantoea eucalypti	Pantoea eucalypti	type VI secretion system AAA+ family ATPase	tssH/clpV	17
d__Bacteria;p__Proteobacteria;c__Gammaproteobacteria;o__Pseudomonadales;f__Pseudomonadaceae;g__Pseudomonas_E;s__Pseudomonas_E chlororaphis_E	Pseudomonas chlororaphis	type III secretion system major export apparatus protein YscV	yscV	15
d__Bacteria;p__Proteobacteria;c__Gammaproteobacteria;o__Enterobacterales;f__Enterobacteriaceae;g__Leclercia;s__Leclercia adecarboxylata	Leclercia adecarboxylata	type VI secretion system AAA+ family ATPase	tssH/clpV	14
d__Bacteria;p__Proteobacteria;c__Gammaproteobacteria;o__Enterobacterales;f__Enterobacteriaceae;g__Enterobacter;s__Enterobacter mori	Enterobacter mori	type VI secretion system tubule-forming protein VipA	vipA	14
d__Bacteria;p__Proteobacteria;c__Gammaproteobacteria;o__Enterobacterales;f__Enterobacteriaceae;g__Pseudescherichia;s__Pseudescherichia sp002298805	Pseudescherichia sp.	type VI secretion system tubule-forming protein VipA	vipA	14
d__Bacteria;p__Proteobacteria;c__Gammaproteobacteria;o__Enterobacterales;f__Enterobacteriaceae;g__Kosakonia;s__Kosakonia cowanii	Kosakonia cowanii	type VI secretion system tubule-forming protein VipA	vipA	14
d__Eukaryota;p__Evosea;c__Eumycetozoa;o__unknown;f__unknown;g__Synstelium;s__Synstelium polycarpum	Synstelium polycarpum	type VI secretion system AAA+ family ATPase	tssH/clpV	13
		Type VII secretion system membrane-anchored mycosin MycP3	mycP3	12
d__Bacteria;p__Proteobacteria;c__Gammaproteobacteria;o__Enterobacterales;f__Enterobacteriaceae;g__Klebsiella;s__Klebsiella sp004342285	Klebsiella sp	type VI secretion system tubule-forming protein VipA	vipA	12
d__Bacteria;p__Proteobacteria;c__Gammaproteobacteria;o__Pseudomonadales;f__Pseudomonadaceae;g__Pseudomonas_E;s__Pseudomonas_E chlororaphis_E	Pseudomonas chlororaphis	type VI secretion system tubule-forming protein VipB	vipB	12
d__Bacteria;p__Proteobacteria;c__Gammaproteobacteria;o__Burkholderiales;f__Burkholderiaceae;g__Comamonas;s__Comamonas acidovorans	Comamonas acidovorans	type VI secretion system tubule-forming protein VipB	vipB	12
		type VI secretion system substrate VgrG1b	vgrG	11
d__Bacteria;p__Proteobacteria;c__Gammaproteobacteria;o__Pseudomonadales;f__Pseudomonadaceae;g__Pseudomonas_E;s__Pseudomonas_E atacamensis	Pseudomonas atacamensis	type VI secretion system AAA+ family ATPase	tssH/clpV	11
d__Bacteria;p__Proteobacteria;c__Gammaproteobacteria;o__Enterobacterales;f__Enterobacteriaceae;g__Pantoea;s__Pantoea endophytica	Pantoea endophytica	type VI secretion system AAA+ family ATPase	tssH/clpV	11
d__Bacteria;p__Proteobacteria;c__Gammaproteobacteria;o__Pseudomonadales;f__Pseudomonadaceae;g__Pseudomonas_E;s__Pseudomonas_E moraviensis_A	Pseudomonas moraviensis	type VI secretion system tubule-forming protein VipB	vipB	11
		type III secretion system ATPase YscN	yscN	10
d__Bacteria;p__Proteobacteria;c__Gammaproteobacteria;o__Enterobacterales;f__Enterobacteriaceae;g__Klebsiella;s__Klebsiella aerogenes	Klebsiella aerogenes	type VI secretion system tubule-forming protein VipB	vipB	10
d__Bacteria;p__Proteobacteria;c__Gammaproteobacteria;o__Pseudomonadales;f__Moraxellaceae;g__Acinetobacter;s__Acinetobacter courvalinii	Acinetobacter courvalinii	type VI secretion system AAA+ family ATPase	tssH/clpV	10
d__Bacteria;p__Proteobacteria;c__Alphaproteobacteria;o__Rhizobiales;f__Xanthobacteraceae;g__Bradyrhizobium;s__Bradyrhizobium sp003020075	Bradyrhizobium sp.	type IV secretion system virB11 protein homolog	virB	10
d__Bacteria;p__Proteobacteria;c__Gammaproteobacteria;o__Burkholderiales;f__Burkholderiaceae;g__Herbaspirillum;s__Herbaspirillum huttiense	Herbaspirillum huttiense	type VI secretion system AAA+ family ATPase	tssH/clpV	9
		type III secretion system secretin PscC	pscC	7
d__Bacteria;p__Proteobacteria;c__Gammaproteobacteria;o__Pseudomonadales;f__Pseudomonadaceae;g__Pseudomonas_E;s__Pseudomonas_E putida_Q	Pseudomonas putida	type III secretion system secretory apparatus	hrc	7
d__Bacteria;p__Proteobacteria;c__Gammaproteobacteria;o__Pseudomonadales;f__Pseudomonadaceae;g__Pseudomonas_E;s__Pseudomonas_E putida_B	Pseudomonas putida	type VI secretion system hcp secretion island protein HsiJ1	hsiJ1	7
d__Bacteria;p__Proteobacteria;c__Gammaproteobacteria;o__Burkholderiales;f__Burkholderiaceae;g__Comamonas;s__Comamonas acidovorans	Comamonas acidovorans	type VI secretion system protein IcmF1	icmF1	7
		type VI secretion system hcp secretion island protein HsiA1	hsiA1	6
d__Bacteria;p__Proteobacteria;c__Gammaproteobacteria;o__Enterobacterales;f__Enterobacteriaceae;g__Enterobacter;s__Enterobacter mori	Enterobacter mori	type VI secretion system tubule-forming protein VipB	vipB	6
d__Bacteria;p__Proteobacteria;c__Gammaproteobacteria;o__Pseudomonadales;f__Pseudomonadaceae;g__Pseudomonas_E;s__Pseudomonas_E moraviensis_A	Pseudomonas moraviensis	type VI secretion system AAA+ family ATPase	tssH/clpV	6
d__Bacteria;p__Proteobacteria;c__Gammaproteobacteria;o__Pseudomonadales;f__Pseudomonadaceae;g__Pseudomonas_E;s__Pseudomonas_E putida_Q	Pseudomonas putida	type III secretion system minor export apparatus protein Spa24	spa	6
d__Bacteria;p__Proteobacteria;c__Gammaproteobacteria;o__Pseudomonadales;f__Pseudomonadaceae;g__Pseudomonas_E;s__Pseudomonas_E putida_B	Pseudomonas putida	type III secretion system ATPase VscN	vscN	6
d__Bacteria;p__Proteobacteria;c__Gammaproteobacteria;o__Burkholderiales;f__Burkholderiaceae;g__Comamonas;s__Comamonas tsuruhatensis	Comamonas tsuruhatensis	type VI secretion system tubule-forming protein VipB	vipB	6
d__Bacteria;p__Proteobacteria;c__Gammaproteobacteria;o__Pseudomonadales;f__Pseudomonadaceae;g__Pseudomonas_E;s__Pseudomonas_E chlororaphis_E	Pseudomonas chlororaphis	type VI secretion system protein DotU	dotU	5
d__Bacteria;p__Proteobacteria;c__Gammaproteobacteria;o__Pseudomonadales;f__Pseudomonadaceae;g__Pseudomonas_E;s__Pseudomonas_E chlororaphis_E	Pseudomonas chlororaphis	type VI secretion system tubule-forming protein VipA	vipA	5
d__Bacteria;p__Proteobacteria;c__Gammaproteobacteria;o__Pseudomonadales;f__Pseudomonadaceae;g__Pseudomonas_E;s__Pseudomonas_E chlororaphis_E	Pseudomonas chlororaphis	type VI secretion system hcp secretion island protein HsiA1	hsiA1	5
		Type III secretion system LcrD homolog protein BcrD	bcrD	4
		Dot/Icm type IV secretion system protein IcmB/DotO	dotO	4
d__Bacteria;p__Proteobacteria;c__Gammaproteobacteria;o__Xanthomonadales;f__Xanthomonadaceae;g__Stenotrophomonas;s__Stenotrophomonas maltophilia_AJ	Stenotrophomonas maltophilia	type III secretion system ATPase PscN	pscN	4
d__Bacteria;p__Proteobacteria;c__Gammaproteobacteria;o__Pseudomonadales;f__Pseudomonadaceae;g__Pseudomonas_E;s__Pseudomonas_E putida_M	Pseudomonas putida	type VI secretion system tubule-forming protein VipB	vipB	4
d__Bacteria;p__Proteobacteria;c__Gammaproteobacteria;o__Pseudomonadales;f__Pseudomonadaceae;g__Pseudomonas_E;s__Pseudomonas_E fluorescens_AO	Pseudomonas fluorescens	type VI secretion system tubule-forming protein VipB	vipB	4
d__Bacteria;p__Proteobacteria;c__Gammaproteobacteria;o__Pseudomonadales;f__Pseudomonadaceae;g__Pseudomonas_E;s__Pseudomonas_E koreensis_C	Pseudomonas koreensis	type VI secretion system tubule-forming protein VipB	vipB	4
d__Bacteria;p__Proteobacteria;c__Gammaproteobacteria;o__Enterobacterales;f__Enterobacteriaceae;g__Klebsiella;s__Klebsiella sp004342285	Klebsiella sp.	type VI secretion system AAA+ family ATPase	tssH/clpV	4
d__Eukaryota;p__Evosea;c__Eumycetozoa;o__unknown;f__unknown;g__Synstelium;s__Synstelium polycarpum	Synstelium polycarpum	type VI secretion system tubule-forming protein VipB	vipB	4
d__Bacteria;p__Proteobacteria;c__Gammaproteobacteria;o__Burkholderiales;f__Burkholderiaceae;g__Comamonas;s__Comamonas tsuruhatensis	Comamonas tsuruhatensis	type VI secretion system protein IcmF1	icmF1	4
		Type VI secretion system protein TssB	tssB	3
		Type VII secretion system protein EccA3	eccA3	3
		type VI secretion system substrate Hcp1	hcp	3
		type III secretion system ATPase VscN	vscN	3
		type III secretion system protein PcrD	pcrD	3
		type III secretion system minor export apparatus protein SpaP	spaP	3
		type III secretion system major export apparatus protein YscV	yscV	3
d__Bacteria;p__Proteobacteria;c__Gammaproteobacteria;o__Xanthomonadales;f__Xanthomonadaceae;g__Stenotrophomonas;s__Stenotrophomonas maltophilia_AJ	Stenotrophomonas maltophilia	type III secretion system ATPase	tssH	3
d__Bacteria;p__Proteobacteria;c__Gammaproteobacteria;o__Enterobacterales;f__Enterobacteriaceae;g__Klebsiella;s__Klebsiella aerogenes	Klebsiella aerogenes	type VI secretion system AAA+ family ATPase	tssH/clpV	3
d__Bacteria;p__Proteobacteria;c__Gammaproteobacteria;o__Pseudomonadales;f__Pseudomonadaceae;g__Pseudomonas_E;s__Pseudomonas_E putida_B	Pseudomonas putida	type III secretion system ATPase PscN	pscN	3
d__Bacteria;p__Proteobacteria;c__Gammaproteobacteria;o__Pseudomonadales;f__Pseudomonadaceae;g__Pseudomonas_E;s__Pseudomonas_E putida_B	Pseudomonas putida	type VI secretion system tubule-forming protein VipA	vipA	3
d__Eukaryota;p__Evosea;c__Eumycetozoa;o__unknown;f__unknown;g__Synstelium;s__Synstelium polycarpum	Synstelium polycarpum	type VI secretion system tubule-forming protein VipA	vipA	3
		type VII secretion system protein EssA, monotopic membrane protein	essA	2
		type VII secretion system protein EsaA	essA	2
		type III secretion system secretory apparatus	hrp	2
d__Bacteria;p__Proteobacteria;c__Gammaproteobacteria;o__Pseudomonadales;f__Pseudomonadaceae;g__Pseudomonas_E;s__Pseudomonas_E atacamensis	Pseudomonas atacamensis	type VI secretion system tubule-forming protein VipB	vipB	2
d__Eukaryota;p__Evosea;c__Eumycetozoa;o__unknown;f__unknown;g__Synstelium;s__Synstelium polycarpum	Synstelium polycarpum	type VI secretion system hcp secretion island protein HsiJ1	hsiJ1	2
d__Bacteria;p__Firmicutes;c__Bacilli;o__Bacillales;f__Bacillaceae_H;g__Priestia;s__Priestia megaterium_A	Priestia megaterium	type VII secretion system protein EssC, FtsK/SpoIIIE family ATPase	essC	2
		Type VII secretion system protein EccB3	eccB3	1
		type III secretion system minor export apparatus protein Spa24	spa	1
		type VI secretion system substrate VgrG1	vgrG	1
d__Bacteria;p__Proteobacteria;c__Gammaproteobacteria;o__Enterobacterales;f__Enterobacteriaceae;g__Pseudescherichia;s__Pseudescherichia vulneris	Pseudescherichia vulneris	type VI secretion system tubule-forming protein VipA	vipA	1
d__Bacteria;p__Proteobacteria;c__Gammaproteobacteria;o__Enterobacterales;f__Enterobacteriaceae;g__Pseudescherichia;s__Pseudescherichia vulneris	Pseudescherichia vulneris	type VI secretion system AAA+ family ATPase	tssH/clpV	1
d__Bacteria;p__Proteobacteria;c__Gammaproteobacteria;o__Enterobacterales;f__Enterobacteriaceae;g__Pantoea;s__Pantoea agglomerans	Pantoea agglomerans	type VI secretion system AAA+ family ATPase	tssH/clpV	1
d__Bacteria;p__Proteobacteria;c__Gammaproteobacteria;o__Pseudomonadales;f__Pseudomonadaceae;g__Pseudomonas_E;s__Pseudomonas_E koreensis_C	Pseudomonas koreensis	Type VI secretion system protein TssB	tssB	1
d__Bacteria;p__Proteobacteria;c__Gammaproteobacteria;o__Pseudomonadales;f__Pseudomonadaceae;g__Pseudomonas_E;s__Pseudomonas_E putida_J	Pseudomonas putida	type VI secretion system AAA+ family ATPase	tssH/clpV	1
d__Bacteria;p__Proteobacteria;c__Gammaproteobacteria;o__Enterobacterales;f__Enterobacteriaceae;g__Pseudescherichia;s__Pseudescherichia sp002480085	Pseudescherichia sp.	type VI secretion system AAA+ family ATPase	tssH/clpV	1
d__Bacteria;p__Proteobacteria;c__Gammaproteobacteria;o__Enterobacterales;f__Enterobacteriaceae;g__Pseudescherichia;s__Pseudescherichia sp002480085	Pseudescherichia sp.	type VI secretion system tubule-forming protein VipA	vipA	1
d__Bacteria;p__Proteobacteria;c__Gammaproteobacteria;o__Pseudomonadales;f__Pseudomonadaceae;g__Pseudomonas_E;s__Pseudomonas_E putida_Q	Pseudomonas putida	type III secretion system minor export apparatus protein SpaQ	spaQ	1
d__Bacteria;p__Proteobacteria;c__Gammaproteobacteria;o__Pseudomonadales;f__Pseudomonadaceae;g__Pseudomonas_E;s__Pseudomonas_E chlororaphis_E	Pseudomonas chlororaphis	type VI secretion system hcp secretion island protein HsiJ1	hsiJ1	1
d__Eukaryota;p__Evosea;c__Eumycetozoa;o__unknown;f__unknown;g__Synstelium;s__Synstelium polycarpum	Synstelium polycarpum	type IV secretion associated protein TagR, positively regulates PpkA	tagR	1
d__Bacteria;p__Proteobacteria;c__Gammaproteobacteria;o__Pseudomonadales;f__Moraxellaceae;g__Acinetobacter;s__Acinetobacter calcoaceticus_B	Acinetobacter calcoaceticus	type VI secretion system AAA+ family ATPase	tssH/clpV	1

## Sheet: RFC-2_SS
Phylogeny	Species	Protein Description	Gene	Read Counts
		type VI secretion system AAA+ family ATPase	tssH/clpV	541
		type VI secretion system tubule-forming protein VipB	vipB	260
d__Bacteria;p__Proteobacteria;c__Gammaproteobacteria;o__Xanthomonadales;f__Xanthomonadaceae;g__Stenotrophomonas;s__Stenotrophomonas maltophilia_AJ	Stenotrophomonas maltophilia	type VI secretion system AAA+ family ATPase	tssH/clpV	129
		type VI secretion system protein IcmF1	icmF1	119
		type VI secretion system tubule-forming protein VipA	vipA	107
		type VI secretion system hcp secretion island protein HsiG1	hsiG1	97
		type VI secretion system hcp secretion island protein HsiJ1	hsiJ1	91
d__Bacteria;p__Proteobacteria;c__Gammaproteobacteria;o__Pseudomonadales;f__Moraxellaceae;g__Acinetobacter;s__Acinetobacter calcoaceticus_B	Acinetobacter calcoaceticus	type VI secretion system AAA+ family ATPase	tssH/clpV	87
		type IV secretion associated protein TagR, positively regulates PpkA	tagR	69
		type VII secretion system protein EssC, FtsK/SpoIIIE family ATPase	essC	65
d__Bacteria;p__Proteobacteria;c__Gammaproteobacteria;o__Burkholderiales;f__Burkholderiaceae;g__Comamonas;s__Comamonas tsuruhatensis	Comamonas tsuruhatensis	type VI secretion system tubule-forming protein VipB	vipB	63
d__Bacteria;p__Proteobacteria;c__Gammaproteobacteria;o__Pseudomonadales;f__Moraxellaceae;g__Acinetobacter;s__Acinetobacter sp004331285	Acinetobacter sp	type VI secretion system AAA+ family ATPase	tssH/clpV	61
		type VI secretion system protein DotU	dotU	61
d__Bacteria;p__Proteobacteria;c__Gammaproteobacteria;o__Burkholderiales;f__Burkholderiaceae;g__Comamonas;s__Comamonas acidovorans	Comamonas acidovorans	type VI secretion system tubule-forming protein VipB	vipB	61
		type VI secretion system substrate VgrG1b	vgrG	58
		Type VII secretion system protein EccA3	eccA3	44
		type VI secretion system substrate VgrG1	vgrG	37
		type VI secretion system hcp secretion island protein HsiH1	hsiH1	25
d__Bacteria;p__Firmicutes;c__Bacilli;o__Staphylococcales;f__Staphylococcaceae;g__Staphylococcus;s__Staphylococcus aureus	Staphylococcus aureus	type VII secretion system protein EsaA	esaA	25
d__Bacteria;p__Firmicutes;c__Bacilli;o__Staphylococcales;f__Staphylococcaceae;g__Staphylococcus;s__Staphylococcus aureus	Staphylococcus aureus	type VII secretion system protein EssC, FtsK/SpoIIIE family ATPase	essC	24
d__Bacteria;p__Proteobacteria;c__Gammaproteobacteria;o__Enterobacterales;f__Enterobacteriaceae;g__Erwinia_B;s__Erwinia_B gerundensis	Erwinia gerundensis	type VI secretion system AAA+ family ATPase	tssH/clpV	23
d__Bacteria;p__Proteobacteria;c__Gammaproteobacteria;o__Pseudomonadales;f__Moraxellaceae;g__Acinetobacter;s__Acinetobacter oleivorans	Acinetobacter oleivorans	type VI secretion system AAA+ family ATPase	tssH/clpV	23
d__Bacteria;p__Firmicutes;c__Bacilli;o__Staphylococcales;f__Staphylococcaceae;g__Staphylococcus;s__Staphylococcus aureus	Staphylococcus aureus	type VII secretion system protein EssB, monotopic membrane protein	essB	23
d__Bacteria;p__Firmicutes;c__Bacilli;o__Staphylococcales;f__Staphylococcaceae;g__Staphylococcus;s__Staphylococcus aureus	Staphylococcus aureus	type VII secretion system protein secreted protein EsxA	esxA	18
		Type IV secretion system transmembrane protein EccD3	eccD3	17
		Type VII secretion system membrane-anchored mycosin MycP3	mycP3	17
		type VII secretion system protein EssB, monotopic membrane protein	essB	17
d__Bacteria;p__Proteobacteria;c__Gammaproteobacteria;o__Burkholderiales;f__Burkholderiaceae;g__Comamonas;s__Comamonas acidovorans	Comamonas acidovorans	type VI secretion system AAA+ family ATPase	tssH/clpV	16
d__Bacteria;p__Proteobacteria;c__Gammaproteobacteria;o__Burkholderiales;f__Burkholderiaceae;g__Comamonas;s__Comamonas tsuruhatensis	Comamonas tsuruhatensis	type VI secretion system AAA+ family ATPase	tssH/clpV	16
		type III secretion system ATPase	tssH	15
d__Bacteria;p__Proteobacteria;c__Gammaproteobacteria;o__Xanthomonadales;f__Xanthomonadaceae;g__Stenotrophomonas;s__Stenotrophomonas maltophilia_AJ	Stenotrophomonas maltophilia	type III secretion system ATPase	tssH	15
		type VII secretion system protein secreted protein EsxA	esxA	15
		type VII secretion system protein secreted protein EsxB	esxB	13
d__Bacteria;p__Proteobacteria;c__Gammaproteobacteria;o__Enterobacterales;f__Enterobacteriaceae;g__Pantoea;s__Pantoea eucalypti	Pantoea eucalypti	type VI secretion system tubule-forming protein VipB	vipB	12
d__Bacteria;p__Proteobacteria;c__Gammaproteobacteria;o__Burkholderiales;f__Burkholderiaceae;g__Herbaspirillum;s__Herbaspirillum huttiense	Herbaspirillum huttiense	type VI secretion system AAA+ family ATPase	tssH/clpV	11
d__Bacteria;p__Firmicutes;c__Bacilli;o__Staphylococcales;f__Staphylococcaceae;g__Staphylococcus;s__Staphylococcus aureus	Staphylococcus aureus	type VII secretion system protein secreted protein EsxB	esxB	11
d__Bacteria;p__Proteobacteria;c__Gammaproteobacteria;o__Enterobacterales;f__Enterobacteriaceae;g__Pseudescherichia;s__Pseudescherichia vulneris	Pseudescherichia vulneris	type VI secretion system AAA+ family ATPase	tssH/clpV	10
		type VII secretion system protein EsaA	esaA	9
d__Bacteria;p__Proteobacteria;c__Gammaproteobacteria;o__Enterobacterales;f__Enterobacteriaceae;g__Enterobacter;s__Enterobacter mori	Enterobacter mori	type VI secretion system AAA+ family ATPase	tssH/clpV	5
d__Bacteria;p__Proteobacteria;c__Gammaproteobacteria;o__Pseudomonadales;f__Pseudomonadaceae;g__Pseudomonas_E;s__Pseudomonas_E atacamensis	Pseudomonas atacamensis	type VI secretion system AAA+ family ATPase	tssH/clpV	5
d__Bacteria;p__Proteobacteria;c__Gammaproteobacteria;o__Enterobacterales;f__Enterobacteriaceae;g__Pseudescherichia;s__Pseudescherichia sp002298805	Pseudescherichia sp	type VI secretion system AAA+ family ATPase	tssH/clpV	4
		type III secretion system ATPase PscN	pscN	3
d__Bacteria;p__Proteobacteria;c__Gammaproteobacteria;o__Pseudomonadales;f__Pseudomonadaceae;g__Pseudomonas_E;s__Pseudomonas_E putida	Pseudomonas putida	type VI secretion system AAA+ family ATPase	tssH/clpV	3
		Type VI secretion system protein TssB	tssB	3
d__Bacteria;p__Proteobacteria;c__Gammaproteobacteria;o__Enterobacterales;f__Enterobacteriaceae;g__Pantoea;s__Pantoea vagans	Pantoea vagans	type VI secretion system tubule-forming protein VipB	vipB	3
d__Bacteria;p__Proteobacteria;c__Gammaproteobacteria;o__Enterobacterales;f__Enterobacteriaceae;g__Pantoea;s__Pantoea eucalypti	Pantoea eucalypti	type VI secretion system AAA+ family ATPase	tssH/clpV	2
d__Bacteria;p__Proteobacteria;c__Gammaproteobacteria;o__Burkholderiales;f__Burkholderiaceae;g__Comamonas;s__Comamonas tsuruhatensis	Comamonas tsuruhatensis	type VI secretion system protein IcmF1	icmF1	2
d__Bacteria;p__Proteobacteria;c__Gammaproteobacteria;o__Xanthomonadales;f__Xanthomonadaceae;g__Stenotrophomonas;s__Stenotrophomonas maltophilia_AJ	Stenotrophomonas maltophilia	type III secretion system ATPase PscN	pscN	1
		type III secretion system effector SseG	sseG	1
d__Bacteria;p__Proteobacteria;c__Gammaproteobacteria;o__Enterobacterales;f__Enterobacteriaceae;g__Leclercia;s__Leclercia adecarboxylata	Leclercia adecarboxylata	type VI secretion system AAA+ family ATPase	tssH/clpV	1
d__Bacteria;p__Proteobacteria;c__Gammaproteobacteria;o__Enterobacterales;f__Enterobacteriaceae;g__Leclercia;s__Leclercia adecarboxylata_C	Leclercia adecarboxylata	type VI secretion system AAA+ family ATPase	tssH/clpV	1
d__Bacteria;p__Proteobacteria;c__Gammaproteobacteria;o__Enterobacterales;f__Enterobacteriaceae;g__Leclercia;s__Leclercia adecarboxylata_A	Leclercia adecarboxylata	type VI secretion system AAA+ family ATPase	tssH/clpV	1
d__Bacteria;p__Proteobacteria;c__Gammaproteobacteria;o__Burkholderiales;f__Burkholderiaceae;g__Comamonas;s__Comamonas acidovorans	Comamonas acidovorans	type VI secretion system protein IcmF1	icmF1	1

## Sheet: RFC-3_SS
Phylogeny	Species	Protein Description	Gene	Read Counts
		type VI secretion system AAA+ family ATPase	tssH/clpV	499
		type VI secretion system tubule-forming protein VipB	vipB	367
		type VII secretion system protein EssC, FtsK/SpoIIIE family ATPase	essC	159
d__Bacteria;p__Proteobacteria;c__Gammaproteobacteria;o__Xanthomonadales;f__Xanthomonadaceae;g__Stenotrophomonas;s__Stenotrophomonas maltophilia_AJ	Stenotrophomonas maltophilia	type VI secretion system AAA+ family ATPase	tssH/clpV	156
d__Bacteria;p__Firmicutes;c__Bacilli;o__Staphylococcales;f__Staphylococcaceae;g__Staphylococcus;s__Staphylococcus aureus	Staphylococcus aureus	type VII secretion system protein EssC, FtsK/SpoIIIE family ATPase	essC	144
		Type VII secretion system protein EccC3	essC3	75
d__Bacteria;p__Firmicutes;c__Bacilli;o__Staphylococcales;f__Staphylococcaceae;g__Staphylococcus;s__Staphylococcus aureus	Staphylococcus aureus	type VII secretion system protein EsaA	esaA	68
		type IV secretion associated protein TagR, positively regulates PpkA	tagR	47
d__Bacteria;p__Proteobacteria;c__Gammaproteobacteria;o__Enterobacterales;f__Enterobacteriaceae;g__Enterobacter;s__Enterobacter ludwigii	Enterobacter ludwigii	type VI secretion system AAA+ family ATPase	tssH/clpV	46
d__Bacteria;p__Proteobacteria;c__Gammaproteobacteria;o__Enterobacterales;f__Enterobacteriaceae;g__Pseudescherichia;s__Pseudescherichia sp002298805	Pseudescherichia sp.	type VI secretion system tubule-forming protein VipB	vipB	42
		Type VI secretion system protein TssB	tssB	41
d__Bacteria;p__Proteobacteria;c__Gammaproteobacteria;o__Enterobacterales;f__Enterobacteriaceae;g__Enterobacter;s__Enterobacter mori	Enterobacter mori	type VI secretion system AAA+ family ATPase	tssH/clpV	38
		type VI secretion system hcp secretion island protein HsiG1	hsiG1	37
		type VI secretion system protein DotU	dotU	36
d__Bacteria;p__Proteobacteria;c__Gammaproteobacteria;o__Enterobacterales;f__Enterobacteriaceae;g__Enterobacter;s__Enterobacter ludwigii	Enterobacter ludwigii	type VI secretion system tubule-forming protein VipB	vipB	34
d__Bacteria;p__Proteobacteria;c__Gammaproteobacteria;o__Pseudomonadales;f__Pseudomonadaceae;g__Pseudomonas_E;s__Pseudomonas_E fluorescens_AO	Pseudomonas fluorescens	type VI secretion system AAA+ family ATPase	tssH/clpV	30
d__Bacteria;p__Proteobacteria;c__Gammaproteobacteria;o__Enterobacterales;f__Enterobacteriaceae;g__Enterobacter;s__Enterobacter mori	Enterobacter mori	type VI secretion system tubule-forming protein VipA	vipA	22
d__Bacteria;p__Proteobacteria;c__Gammaproteobacteria;o__Enterobacterales;f__Enterobacteriaceae;g__Pantoea;s__Pantoea eucalypti	Pantoea eucalypti	type VI secretion system tubule-forming protein VipB	vipB	22
d__Bacteria;p__Proteobacteria;c__Gammaproteobacteria;o__Burkholderiales;f__Burkholderiaceae;g__Comamonas;s__Comamonas acidovorans	Comamonas acidovorans	type VI secretion system AAA+ family ATPase	tssH/clpV	21
d__Bacteria;p__Proteobacteria;c__Gammaproteobacteria;o__Pseudomonadales;f__Pseudomonadaceae;g__Pseudomonas_E;s__Pseudomonas_E atacamensis	Pseudomonas atacamensis	type VI secretion system AAA+ family ATPase	tssH/clpV	20
d__Bacteria;p__Proteobacteria;c__Gammaproteobacteria;o__Pseudomonadales;f__Moraxellaceae;g__Acinetobacter;s__Acinetobacter oleivorans	Acinetobacter oleivorans	type VI secretion system AAA+ family ATPase	tssH/clpV	20
d__Bacteria;p__Proteobacteria;c__Gammaproteobacteria;o__Enterobacterales;f__Enterobacteriaceae;g__Pseudescherichia;s__Pseudescherichia sp002480085	Pseudescherichia sp.	type VI secretion system tubule-forming protein VipB	vipB	20
		type VI secretion system tubule-forming protein VipA	vipA	19
d__Bacteria;p__Proteobacteria;c__Gammaproteobacteria;o__Pseudomonadales;f__Moraxellaceae;g__Acinetobacter;s__Acinetobacter calcoaceticus_B	Acinetobacter calcoaceticus	type VI secretion system AAA+ family ATPase	tssH/clpV	18
d__Bacteria;p__Proteobacteria;c__Gammaproteobacteria;o__Pseudomonadales;f__Pseudomonadaceae;g__Pseudomonas_E;s__Pseudomonas_E fluorescens_AO	Pseudomonas fluorescens	type VI secretion system tubule-forming protein VipB	vipB	17
		type VII secretion system protein EssA, monotopic membrane protein	essA	16
d__Bacteria;p__Proteobacteria;c__Gammaproteobacteria;o__Enterobacterales;f__Enterobacteriaceae;g__Pantoea;s__Pantoea ludwigii_B	Pantoea ludwigii	type VI secretion system AAA+ family ATPase	tssH/clpV	15
d__Bacteria;p__Firmicutes;c__Bacilli;o__Staphylococcales;f__Staphylococcaceae;g__Staphylococcus;s__Staphylococcus aureus	Staphylococcus aureus	type VII secretion system protein EssA, monotopic membrane protein	essA	15
		type III secretion system ATPase YscN	yscN	14
		type VII secretion system protein EsaB	esaB	14
d__Bacteria;p__Proteobacteria;c__Gammaproteobacteria;o__Pseudomonadales;f__Pseudomonadaceae;g__Pseudomonas_E;s__Pseudomonas_E koreensis_C	Pseudomonas koreensis	type VI secretion system AAA+ family ATPase	tssH/clpV	13
d__Bacteria;p__Proteobacteria;c__Gammaproteobacteria;o__Enterobacterales;f__Enterobacteriaceae;g__Enterobacter;s__Enterobacter mori	Enterobacter mori	type VI secretion system tubule-forming protein VipB	vipB	13
		Type III secretion system ATPase	tssH	12
d__Bacteria;p__Proteobacteria;c__Gammaproteobacteria;o__Enterobacterales;f__Enterobacteriaceae;g__Pantoea;s__Pantoea eucalypti	Pantoea eucalypti	type VI secretion system AAA+ family ATPase	tssH/clpV	12
d__Bacteria;p__Proteobacteria;c__Gammaproteobacteria;o__Enterobacterales;f__Enterobacteriaceae;g__Pseudescherichia;s__Pseudescherichia vulneris	Pseudescherichia vulneris	type VI secretion system AAA+ family ATPase	tssH/clpV	12
d__Bacteria;p__Proteobacteria;c__Gammaproteobacteria;o__Enterobacterales;f__Enterobacteriaceae;g__Pseudescherichia;s__Pseudescherichia vulneris	Pseudescherichia vulneris	type VI secretion system tubule-forming protein VipB	vipB	12
d__Bacteria;p__Firmicutes;c__Bacilli;o__Staphylococcales;f__Staphylococcaceae;g__Staphylococcus;s__Staphylococcus aureus	Staphylococcus aureus	type VII secretion system protein EsaB	esaB	11
		type III secretion system ATPase PscN	pscN	10
d__Bacteria;p__Proteobacteria;c__Gammaproteobacteria;o__Xanthomonadales;f__Xanthomonadaceae;g__Stenotrophomonas;s__Stenotrophomonas maltophilia_AJ	Stenotrophomonas maltophilia	type III secretion system ATPase YscN	yscN	10
d__Bacteria;p__Proteobacteria;c__Gammaproteobacteria;o__Burkholderiales;f__Burkholderiaceae;g__Comamonas;s__Comamonas tsuruhatensis	Comamonas tsuruhatensis	type VI secretion system AAA+ family ATPase	tssH/clpV	10
d__Bacteria;p__Proteobacteria;c__Gammaproteobacteria;o__Pseudomonadales;f__Pseudomonadaceae;g__Pseudomonas_E;s__Pseudomonas_E atacamensis	Pseudomonas atacamensis	Type VI secretion system protein TssB	tssB	9
d__Bacteria;p__Proteobacteria;c__Gammaproteobacteria;o__Pseudomonadales;f__Pseudomonadaceae;g__Pseudomonas_E;s__Pseudomonas_E fluorescens_AO	Pseudomonas fluorescens	Type VI secretion system protein TssB	tssB	9
d__Bacteria;p__Proteobacteria;c__Gammaproteobacteria;o__Pseudomonadales;f__Pseudomonadaceae;g__Pseudomonas_E;s__Pseudomonas_E atacamensis	Pseudomonas atacamensis	type VI secretion system tubule-forming protein VipB	vipB	9
d__Bacteria;p__Proteobacteria;c__Gammaproteobacteria;o__Enterobacterales;f__Enterobacteriaceae;g__Pantoea;s__Pantoea vagans	Pantoea vagans	type VI secretion system tubule-forming protein VipB	vipB	9
d__Bacteria;p__Actinobacteriota;c__Actinomycetia;o__Mycobacteriales;f__Mycobacteriaceae;g__Mycobacterium;s__Mycobacterium phocaicum	Mycobacterium phocaicum	Type VII secretion system protein EccC3	eccC3	9
d__Bacteria;p__Proteobacteria;c__Gammaproteobacteria;o__Xanthomonadales;f__Xanthomonadaceae;g__Stenotrophomonas;s__Stenotrophomonas maltophilia_AJ	Stenotrophomonas maltophilia	type III secretion system ATPase PscN	pscN	8
d__Bacteria;p__Proteobacteria;c__Gammaproteobacteria;o__Enterobacterales;f__Enterobacteriaceae;g__Pseudescherichia;s__Pseudescherichia sp002480085	Pseudescherichia sp.	type VI secretion system AAA+ family ATPase	tssH/clpV	8
d__Bacteria;p__Proteobacteria;c__Gammaproteobacteria;o__Enterobacterales;f__Enterobacteriaceae;g__Enterobacter;s__Enterobacter ludwigii	Enterobacter ludwigii	type VI secretion system tubule-forming protein VipA	vipA	8
d__Bacteria;p__Proteobacteria;c__Gammaproteobacteria;o__Pseudomonadales;f__Pseudomonadaceae;g__Pseudomonas_E;s__Pseudomonas_E koreensis_C	Pseudomonas koreensis	type VI secretion system tubule-forming protein VipB	vipB	8
d__Bacteria;p__Proteobacteria;c__Gammaproteobacteria;o__Burkholderiales;f__Burkholderiaceae;g__Comamonas;s__Comamonas tsuruhatensis	Comamonas tsuruhatensis	type VI secretion system tubule-forming protein VipB	vipB	8
		type III secretion system ATPase	tssH	7
d__Bacteria;p__Proteobacteria;c__Gammaproteobacteria;o__Pseudomonadales;f__Pseudomonadaceae;g__Pseudomonas_E;s__Pseudomonas_E koreensis_C	Pseudomonas koreensis	Type VI secretion system protein TssB	tssB	7
d__Bacteria;p__Proteobacteria;c__Gammaproteobacteria;o__Enterobacterales;f__Enterobacteriaceae;g__Erwinia_B;s__Erwinia_B gerundensis	Erwinia gerundensis	type VI secretion system AAA+ family ATPase	tssH/clpV	6
d__Bacteria;p__Proteobacteria;c__Gammaproteobacteria;o__Enterobacterales;f__Enterobacteriaceae;g__Leclercia;s__Leclercia adecarboxylata	Leclercia adecarboxylata	type VI secretion system AAA+ family ATPase	tssH/clpV	6
d__Bacteria;p__Proteobacteria;c__Gammaproteobacteria;o__Enterobacterales;f__Enterobacteriaceae;g__Pseudescherichia;s__Pseudescherichia sp002298805	Pseudescherichia sp.	type VI secretion system AAA+ family ATPase	tssH/clpV	6
		type VII secretion system protein EsaA	esaA	6
d__Bacteria;p__Proteobacteria;c__Gammaproteobacteria;o__Enterobacterales;f__Enterobacteriaceae;g__Pantoea;s__Pantoea vagans	Pantoea vagans	type VI secretion system AAA+ family ATPase	tssH/clpV	5
d__Bacteria;p__Proteobacteria;c__Gammaproteobacteria;o__Burkholderiales;f__Burkholderiaceae;g__Herbaspirillum;s__Herbaspirillum huttiense	Herbaspirillum huttiense	type VI secretion system AAA+ family ATPase	tssH/clpV	5
d__Bacteria;p__Proteobacteria;c__Gammaproteobacteria;o__Pseudomonadales;f__Moraxellaceae;g__Acinetobacter;s__Acinetobacter sp004331285	Acinetobacter sp.	type VI secretion system AAA+ family ATPase	tssH/clpV	4
		type VI secretion system protein IcmF1	icmF1	4
d__Bacteria;p__Proteobacteria;c__Gammaproteobacteria;o__Enterobacterales;f__Enterobacteriaceae;g__Leclercia;s__Leclercia adecarboxylata_B	Leclercia adecarboxylata	type VI secretion system AAA+ family ATPase	tssH/clpV	3
d__Bacteria;p__Proteobacteria;c__Gammaproteobacteria;o__Pseudomonadales;f__Pseudomonadaceae;g__Pseudomonas_E;s__Pseudomonas_E putida_Q	Pseudomonas putida	type VI secretion system tubule-forming protein VipB	vipB	3
d__Bacteria;p__Proteobacteria;c__Gammaproteobacteria;o__Burkholderiales;f__Burkholderiaceae;g__Comamonas;s__Comamonas acidovorans	Comamonas acidovorans	type VI secretion system tubule-forming protein VipB	vipB	3
d__Bacteria;p__Proteobacteria;c__Gammaproteobacteria;o__Xanthomonadales;f__Xanthomonadaceae;g__Stenotrophomonas;s__Stenotrophomonas maltophilia_AJ	Stenotrophomonas maltophilia	type III secretion system ATPase	tssH	2
		type IV secretion system virB11 protein homolog	virB	2
d__Bacteria;p__Proteobacteria;c__Gammaproteobacteria;o__Enterobacterales;f__Enterobacteriaceae;g__Leclercia;s__Leclercia adecarboxylata_C	Leclercia adecarboxylata	type VI secretion system AAA+ family ATPase	tssH/clpV	2
d__Bacteria;p__Proteobacteria;c__Gammaproteobacteria;o__Pseudomonadales;f__Pseudomonadaceae;g__Pseudomonas_A;s__Pseudomonas_A stutzeri	Pseudomonas stutzeri	Type VI secretion system protein TssB	tssB	2
		type VII secretion system protein secreted protein EsxB	esxB	2
d__Bacteria;p__Firmicutes;c__Bacilli;o__Staphylococcales;f__Staphylococcaceae;g__Staphylococcus;s__Staphylococcus aureus	Staphylococcus aureus	type VII secretion system protein secreted protein EsxB	esxB	2
		type VII secretion system protein secreted protein EsxC	esxC	2
d__Bacteria;p__Firmicutes;c__Bacilli;o__Staphylococcales;f__Staphylococcaceae;g__Staphylococcus;s__Staphylococcus aureus	Staphylococcus aureus	type VII secretion system protein secreted protein EsxC	esxC	2
d__Bacteria;p__Proteobacteria;c__Gammaproteobacteria;o__Xanthomonadales;f__Xanthomonadaceae;g__Stenotrophomonas;s__Stenotrophomonas maltophilia_AJ	Stenotrophomonas maltophilia	type III secretion system ATPase VscN	vscN	1
		type III secretion system major export apparatus protein YscV	yscV	1

## Sheet: Top100_RFC-1
	Protein	Read Counts	Protein Descriptions
	DNA-directed RNA polymerase subunit beta	7004	transcription
	elongation factor Tu	4954	protein translation elongation
	carbamoyl phosphate synthase large subunit	4716	pyrimidine and arginine biosynthesis
	phosphoribosylformylglycinamidine synthase	3435	purine biosynthesis
	excinuclease ABC subunit A	3332	nucleotide excision DNA repair
	molecular chaperone DnaK	3308	protein folding and stress response
	dihydroxy-acid dehydratase	3230	branched-chain amino acid biosynthesis
	F0F1 ATP synthase subunit alpha	3126	ATP synthesis (oxidative phosphorylation)
	nitrate reductase 1, alpha subunit	2795	anaerobic respiration (nitrate reduction)
	protein disaggregation chaperone	2683	...
	DNA-binding ATP-dependent protease La	2318	ATP-dependent protease, protein quality control
	transketolase	2292	pentose phosphate pathway, produces NADPH
	lipoprotein NlpD	2277	cell wall / envelope remodeling
	cytochrome o ubiquinol oxidase subunit I	2207	aerobic respiration (terminal oxidase)
	recombinase A	2095	homologous recombination and DNA repair
	chaperonin GroEL	1952	protein folding
	carbon starvation protein	1934	...
	polynucleotide phosphorylase/polyadenylase	1931	RNA degradation and processing
	DNA gyrase subunit A	1923	DNA supercoiling (replication/transcription support)
	phosphoribosylamine--glycine ligase	1822	purine biosynthesis
	DNA polymerase III subunit alpha	1818	DNA replication
	ATP-dependent RNA helicase HrpA	1755	RNA processing and regulation
	acetyl-/propionyl-CoA carboxylase subunit beta	1748	fatty acid and propionate metabolism
	GMP synthase	1718	purine biosynthesis
	flagellar biosynthesis protein FlhA	1706	flagellar assembly and motility
	bifunctional phosphoribosylaminoimidazolecarboxamide formyltransferase/IMP cyclohydrolase	1675	purine biosynthesis
	heat shock protein 90	1650	protein folding and stress response
	B12-dependent methionine synthase	1644	methionine biosynthesis
	ClpB protein	1638	protein disaggregation and stress response
	carbon starvation protein A	1623	stress response, nutrient limitation
	biofilm-associated protein	1569	...
	serine hydroxymethyltransferase	1558	one-carbon metabolism, serine/glycine interconversion
	NADH dehydrogenase subunit G	1552	respiratory electron transport
	endopeptidase Clp ATP-binding chain C	1499	ATP-dependent protease, protein quality control
	aconitate hydratase	1464	TCA cycle
	ATP-dependent protease ATP-binding subunit ClpX	1464	ATP-dependent protease, protein quality control
	bifunctional (p)ppGpp synthetase II/ guanosine-3',5'-bis pyrophosphate 3'-pyrophosphohydrolase	1429	stringent response regulation
	glutamate synthase NADPH large chain	1378	nitrogen assimilation and amino acid biosynthesis
	GTP pyrophosphokinase	1306	stringent response, alarmone synthesis
	carbamoyl phosphate synthase small subunit	1305	arginine and pyrimidine biosynthesis
	bifunctional NADH:ubiquinone oxidoreductase subunit C/D	1259	respiratory electron transport
	dipeptide ABC transporter periplasmic dipeptide-binding protein	1253	peptide transport
	2-oxoglutarate dehydrogenase E1 component	1249	TCA cycle
	malic enzyme	1233	central carbon metabolism
	inosine 5'-monophosphate dehydrogenase	1190	purine biosynthesis
	pyruvate, water dikinase	1187	gluconeogenesis and energy metabolism
	chorismate synthase	1182	aromatic amino acid biosynthesis
	peptide chain release factor 3	1163	translation termination
	aldehyde dehydrogenase	1162	aldehyde metabolism
	DNA topoisomerase IV subunit B	1158	DNA topology and chromosome segregation
	Holliday junction DNA helicase RuvB	1130	homologous recombination and DNA repair
	twitching motility protein PilT	1123	twitching motility
	anaerobic ribonucleoside triphosphate reductase	1102	DNA synthesis under anaerobic conditions
	flagellum-specific ATP synthase FliI	1094	flagellar assembly and export
	RNA polymerase sigma factor RpoS	1090	general stress response regulation
	GDP/GTP pyrophosphokinase	1057	stringent response, alarmone synthesis
	Hsp60, 60K heat shock protein HtpB	1047	protein folding and stress response
	ribonuclease E	1009	RNA processing and degradation
	exoribonuclease R	998	RNA degradation
	thioredoxin reductase	970	redox homeostasis
	DNA topoisomerase I	956	DNA supercoiling regulation
	C4-dicarboxylate transporter DctA	951	C4-dicarboxylate transport
	formate acetyltransferase 3	950	mixed-acid fermentation
	phosphoglycerate kinase	949	glycolysis
	isopropylmalate isomerase large subunit	934	leucine biosynthesis
	methyl-accepting chemotaxis protein CheD	902	chemotaxis signaling
	two-component sensor protein	895	signal transduction
	alanyl-tRNA synthetase	892	tRNA charging
	peptide synthase PvdL	874	siderophore biosynthesis
	tRNA delta(2)-isopentenylpyrophosphate transferase	872	tRNA modification
	arginine decarboxylase	864	polyamine biosynthesis
	hypothetical protein PA14_38610	861	...
	ATP-dependent Clp protease proteolytic subunit	852	ATP-dependent proteolysis
	putative oxidoreductase	846	...
	osmolarity sensor protein	811	osmotic stress sensing
	ABC transporter ATP-binding protein	806	ATP-dependent transport
	glutamine synthetase	799	nitrogen assimilation
	transcriptional regulator FleQ	786	flagellar gene regulation
	threonine synthase	785	threonine biosynthesis
	polyphosphate kinase	781	polyphosphate metabolism
	argininosuccinate synthase	775	arginine biosynthesis
	acetolactate synthase 3 catalytic subunit	771	branched-chain amino acid biosynthesis
	GTP-dependent nucleic acid-binding protein EngD	769	ribosome assembly
	flagellar motor switch protein G	768	flagellar motor switching and chemotaxis
	phosphomannomutase	712	carbohydrate metabolism
	GTP binding translational elongation factor Tu and G family protein	698	protein translation elongation
	hypothetical protein PA4115	698	...
	flagellar motor protein	689	flagellar rotation
	acetolactate synthase 2 catalytic subunit	684	branched-chain amino acid biosynthesis
	formate acetyltransferase 3	684	mixed-acid fermentation
	flagellar motor switch protein FliM	681	flagellar motor switching
	dihydrolipoamide dehydrogenase	673	central metabolism and redox balance
	acetyl-CoA carboxylase carboxyltransferase subunit alpha	671	fatty acid biosynthesis
	aspartate-semialdehyde dehydrogenase	661	amino acid biosynthesis
	glyceraldehyde-3-phosphate dehydrogenase	653	glycolysis
	phosphoglucomutase	652	carbohydrate metabolism
	3-oxoacyl-ACP synthase	639	fatty acid biosynthesis
	catalase	637	oxidative stress response
	putative ABC transporter ATP-binding protein	613	ATP-dependent transport
	serine endoprotease	611	protein degradation

## Sheet: Top100_RFC-2
	Protein	Read Counts	Protein Descriptions
	DNA-directed RNA polymerase subunit beta	6565	transcription
	elongation factor Tu	5280	protein translation elongation
	carbamoyl phosphate synthase large subunit	4169	pyrimidine and arginine biosynthesis
	dihydroxy-acid dehydratase	3599	branched-chain amino acid biosynthesis
	biofilm-associated protein	3492	...
	excinuclease ABC subunit A	3422	nucleotide excision DNA repair
	F0F1 ATP synthase subunit alpha	3194	ATP synthesis (oxidative phosphorylation)
	molecular chaperone DnaK	3039	protein folding and stress response
	cytochrome o ubiquinol oxidase subunit I	3015	aerobic respiration (terminal oxidase)
	nitrate reductase 1, alpha subunit	2806	anaerobic respiration (nitrate reduction)
	phosphoribosylformylglycinamidine synthase	2786	purine biosynthesis
	recombinase A	2560	homologous recombination and DNA repair
	serine hydroxymethyltransferase	2344	one-carbon metabolism
	polynucleotide phosphorylase/polyadenylase	2289	RNA degradation and processing
	acetyl-/propionyl-CoA carboxylase subunit beta	2257	fatty acid and propionate metabolism
	protein disaggregation chaperone	2077	...
	phosphoribosylamine--glycine ligase	1969	purine biosynthesis
	GMP synthase	1929	purine biosynthesis
	heat shock protein 90	1862	protein folding and stress response
	DNA-binding ATP-dependent protease La	1787	ATP-dependent proteolysis, protein quality control
	chaperonin GroEL	1786	protein folding
	carbon starvation protein A	1772	stress response, nutrient limitation
	carbon starvation protein	1755	stress response, nutrient limitation
	transketolase	1755	pentose phosphate pathway, produces NADPH
	glutamate synthase NADPH large chain	1706	nitrogen assimilation and amino acid biosynthesis
	aconitate hydratase	1605	TCA cycle
	ATP-dependent protease ATP-binding subunit ClpX	1589	ATP-dependent protease, protein quality control
	methyl-accepting chemotaxis protein CheD	1537	chemotaxis signaling
	B12-dependent methionine synthase	1531	methionine biosynthesis
	DNA gyrase subunit A	1506	DNA supercoiling and replication
	lipoprotein NlpD	1455	cell wall / envelope remodeling
	DNA polymerase III subunit alpha	1398	DNA replication
	Holliday junction DNA helicase RuvB	1390	homologous recombination and DNA repair
	ClpB protein	1327	protein disaggregation and stress response
	ATP-dependent RNA helicase HrpA	1308	RNA processing and regulation
	bifunctional phosphoribosylaminoimidazolecarboxamide formyltransferase/IMP cyclohydrolase	1290	purine biosynthesis
	thioredoxin reductase	1284	redox homeostasis
	pyruvate, water dikinase	1284	gluconeogenesis and energy metabolism
	malic enzyme	1217	central carbon metabolism
	NADH dehydrogenase subunit G	1189	respiratory electron transport
	flagellum-specific ATP synthase FliI	1173	flagellar assembly and export
	DNA-directed RNA polymerase subunit beta	1158	transcription
	endopeptidase Clp ATP-binding chain C	1146	ATP-dependent protease, protein quality control
	catalase	1124	oxidative stress defense
	chorismate synthase	1094	aromatic amino acid biosynthesis
	putative oxidoreductase	1083	...
	twitching motility protein PilT	1082	twitching motility
	2-oxoglutarate dehydrogenase E1 component	1073	TCA cycle
	flagellar biosynthesis protein FlhA	1042	flagellar assembly
	DNA topoisomerase IV subunit B	1009	DNA topology and chromosome segregation
	anaerobic ribonucleoside triphosphate reductase	999	DNA synthesis under anaerobic conditions
	argininosuccinate synthase	998	arginine biosynthesis
	carbamoyl phosphate synthase small subunit	995	arginine and pyrimidine biosynthesis
	peptide chain release factor 3	951	translation termination
	transcriptional regulator FleQ	931	flagellar gene regulation
	ATP-dependent Clp protease proteolytic subunit	896	ATP-dependent proteolysis
	preprotein translocase subunit SecA	883	protein translocation
	hypothetical protein PA4115	877	...
	Hsp60, 60K heat shock protein HtpB	877	protein folding and stress response
	hypothetical protein PA14_38610	870	...
	aldehyde dehydrogenase	866	aldehyde metabolism
	ABC transporter ATP-binding protein	861	ATP-dependent transport
	bifunctional NADH:ubiquinone oxidoreductase subunit C/D	857	respiratory electron transport
	alanyl-tRNA synthetase	848	tRNA charging
	inosine 5'-monophosphate dehydrogenase	847	purine biosynthesis
	exoribonuclease R	809	RNA degradation
	glutamine synthetase	805	nitrogen assimilation
	biofilm-associated protein	794	...
	dihydrolipoamide dehydrogenase	792	central metabolism and redox balance
	bifunctional (p)ppGpp synthetase II/ guanosine-3',5'-bis pyrophosphate 3'-pyrophosphohydrolase	777	stringent response regulation
	phosphoribosylformylglycinamidine synthase	777	purine biosynthesis
	phosphoribosylformylglycinamidine synthase II	752	purine biosynthesis
	formate acetyltransferase 3	750	mixed-acid fermentation
	phosphoglycerate kinase	750	glycolysis
	methyl-accepting chemotaxis protein CheD	741	chemotaxis signaling
	CAIB/BAIF family protein	734	...
	hypothetical protein	732	...
	arginine decarboxylase	730	polyamine biosynthesis
	GTP pyrophosphokinase	713	stringent response, alarmone synthesis
	acetolactate synthase 3 catalytic subunit	712	branched-chain amino acid biosynthesis
	dihydrolipoamide acetyltransferase	711	central metabolism and acetyl-CoA processing
	ketol-acid reductoisomerase	677	branched-chain amino acid biosynthesis
	1-deoxy-D-xylulose-5-phosphate synthase	676	isoprenoid biosynthesis (MEP pathway)
	DNA topoisomerase I	670	DNA supercoiling regulation
	phosphoribosylaminoimidazole synthetase	664	purine biosynthesis
	dihydroxy-acid dehydratase	660	branched-chain amino acid biosynthesis
	GTP-dependent nucleic acid-binding protein EngD	658	ribosome assembly
	nitrate reductase 1, alpha subunit	657	anaerobic respiration (nitrate reduction)
	dipeptide ABC transporter periplasmic dipeptide-binding protein	650	peptide transport
	cytochrome c-type biogenesis protein CcmF	630	cytochrome c biogenesis
	flagellar motor switch protein G	604	flagellar motor switching and chemotaxis
	ribonuclease E	597	RNA processing and degradation
	heat shock protein 90	592	protein folding and stress response
	likely multifunctional urea amidolyase	585	urea metabolism
	isopropylmalate isomerase large subunit	582	leucine biosynthesis
	phosphate acetyltransferase	580	acetate metabolism
	GDP/GTP pyrophosphokinase	578	stringent response, alarmone synthesis
	RNA polymerase sigma factor	577	transcriptional regulation
	3-phosphoshikimate 1-carboxyvinyltransferase	567	aromatic amino acid biosynthesis
	phosphomannomutase	557	carbohydrate metabolism

## Sheet: Top100-RFC-3
	Protein	Read Counts	Protein Descriptions
	DNA-directed RNA polymerase subunit beta	7699	transcription
	elongation factor Tu	4694	protein translation elongation
	carbamoyl phosphate synthase large subunit	4681	pyrimidine and arginine biosynthesis
	F0F1 ATP synthase subunit alpha	4514	ATP synthesis
	phosphoribosylformylglycinamidine synthase	3847	purine biosynthesis
	molecular chaperone DnaK	3479	protein folding and stress response
	dihydroxy-acid dehydratase	3358	branched-chain amino acid biosynthesis
	nitrate reductase 1, alpha subunit	3332	anaerobic respiration
	cytochrome o ubiquinol oxidase subunit I	3194	aerobic respiration
	excinuclease ABC subunit A	2844	nucleotide excision DNA repair
	DNA-binding ATP-dependent protease La	2761	ATP-dependent proteolysis, protein quality control
	protein disaggregation chaperone	2694	protein disaggregation and stress response
	DNA polymerase III subunit alpha	2439	DNA replication
	bifunctional phosphoribosylaminoimidazolecarboxamide formyltransferase/IMP cyclohydrolase	2267	purine biosynthesis
	transketolase	2217	pentose phosphate pathway
	ATP-dependent protease ATP-binding subunit ClpX	2178	ATP-dependent protease, protein quality control
	acetyl-/propionyl-CoA carboxylase subunit beta	2178	fatty acid and propionate metabolism
	polynucleotide phosphorylase/polyadenylase	2169	RNA degradation and processing
	carbon starvation protein A	2142	stress response, nutrient limitation
	heat shock protein 90	2141	protein folding and stress response
	NADH dehydrogenase subunit G	2095	respiratory electron transport
	serine hydroxymethyltransferase	2073	one-carbon metabolism
	recombinase A	2001	homologous recombination and DNA repair
	biofilm-associated protein	1996	...
	aconitate hydratase	1986	TCA cycle
	DNA gyrase subunit A	1961	DNA supercoiling and replication
	2-oxoglutarate dehydrogenase E1 component	1754	TCA cycle
	carbon starvation protein	1719	stress response, nutrient limitation
	GMP synthase	1698	purine biosynthesis
	RNA polymerase sigma factor RpoS	1667	general stress response regulation
	phosphoribosylamine--glycine ligase	1640	purine biosynthesis
	ClpB protein	1590	protein disaggregation and stress response
	pyruvate, water dikinase	1563	gluconeogenesis and energy metabolism
	ATP-dependent RNA helicase HrpA	1558	RNA processing and regulation
	flagellar biosynthesis protein FlhA	1529	flagellar assembly
	bifunctional NADH:ubiquinone oxidoreductase subunit C/D	1525	respiratory electron transport
	chaperonin GroEL	1491	protein folding
	nitrate reductase 1, alpha subunit	1467	anaerobic respiration
	DNA topoisomerase I	1465	DNA supercoiling regulation
	peptide chain release factor 3	1443	translation termination
	lipoprotein NlpD	1439	cell wall / envelope remodeling
	B12-dependent methionine synthase	1434	methionine biosynthesis
	glutamate synthase NADPH large chain	1427	nitrogen assimilation and amino acid biosynthesis
	malic enzyme	1404	central carbon metabolism
	transcriptional regulator FleQ	1401	flagellar gene regulation
	endopeptidase Clp ATP-binding chain C	1388	ATP-dependent protease, protein quality control
	bifunctional (p)ppGpp synthetase II/ guanosine-3',5'-bis pyrophosphate 3'-pyrophosphohydrolase	1339	stringent response regulation
	inosine 5'-monophosphate dehydrogenase	1320	purine biosynthesis
	dipeptide ABC transporter periplasmic dipeptide-binding protein	1257	peptide transport
	peptide synthase PvdL	1238	siderophore biosynthesis
	anaerobic ribonucleoside triphosphate reductase	1190	DNA synthesis under anaerobic conditions
	carbamoyl phosphate synthase small subunit	1186	arginine and pyrimidine biosynthesis
	GTP pyrophosphokinase	1183	stringent response, alarmone synthesis
	carbon starvation protein A	1168	stress response, nutrient limitation
	thioredoxin reductase	1144	redox homeostasis
	twitching motility protein PilT	1143	twitching motility
	exoribonuclease R	1113	RNA degradation
	GTP-dependent nucleic acid-binding protein EngD	1107	ribosome assembly
	C4-dicarboxylate transporter DctA	1079	C4-dicarboxylate transport
	Holliday junction DNA helicase RuvB	1077	homologous recombination and DNA repair
	chorismate synthase	1072	aromatic amino acid biosynthesis
	aconitate hydratase	1070	TCA cycle
	isopropylmalate isomerase large subunit	1052	leucine biosynthesis
	ATP-dependent Clp protease proteolytic subunit	1028	ATP-dependent proteolysis
	DNA polymerase III subunit alpha	1022	DNA replication
	DNA topoisomerase IV subunit B	1020	DNA topology and chromosome segregation
	flagellum-specific ATP synthase FliI	1020	flagellar assembly and export
	arginine decarboxylase	1017	polyamine biosynthesis
	polyphosphate kinase	1016	polyphosphate metabolism
	hypothetical protein PA4115	988	...
	putative oxidoreductase	974	...
	alanyl-tRNA synthetase	967	tRNA charging
	phosphoglucomutase	965	carbohydrate metabolism
	hypothetical protein PA14_38610	964	...
	ATP-dependent RNA helicase HrpA	961	RNA processing and regulation
	Hsp60, 60K heat shock protein HtpB	958	protein folding and stress response
	catalase	958	oxidative stress defense
	glutamine synthetase	953	nitrogen assimilation
	aldehyde dehydrogenase	952	aldehyde metabolism
	NADH dehydrogenase subunit G	952	respiratory electron transport
	ribonuclease E	938	RNA processing and degradation
	methyl-accepting chemotaxis protein CheD	932	chemotaxis signaling
	tRNA delta(2)-isopentenylpyrophosphate transferase	927	tRNA modification
	preprotein translocase subunit SecA	917	protein translocation
	hybrid sensory histidine kinase BarA	902	signal transduction
	UTP-glucose-1-phosphate uridylyltransferase	852	carbohydrate biosynthesis
	exoribonuclease R	832	RNA degradation
	likely multifunctional urea amidolyase	825	urea metabolism
	bifunctional (p)ppGpp synthetase II/ guanosine-3',5'-bis pyrophosphate 3'-pyrophosphohydrolase	813	stringent response regulation
	flagellar synthesis regulator FleN	803	flagellar regulation
	formate acetyltransferase 3	803	mixed-acid fermentation
	hypothetical protein	798	...
	transketolase	797	pentose phosphate pathway
	enterobactin synthase multienzyme complex component, ATP-dependent	796	siderophore biosynthesis
	phosphoribosylaminoimidazole synthetase	794	purine biosynthesis
	flagellar motor switch protein FliM	788	flagellar motor switching and chemotaxis
	threonine synthase	785	threonine biosynthesis
	glyceraldehyde-3-phosphate dehydrogenase	784	glycolysis
	phosphoglycerate kinase	783	glycolysis
	tryptophan synthase subunit beta	762	tryptophan biosynthesis

## Sheet: Species_RFC-1
genome_id	taxid	taxa	seq_identity(%)	genome_coverage(%)	genome_ave_depth	read_depth(>1x)	total_mapped_reads
GCF_001274595.1	NA	d__Bacteria;p__Proteobacteria;c__Gammaproteobacteria;o__Xanthomonadales;f__Xanthomonadaceae;g__Stenotrophomonas;s__Stenotrophomonas maltophilia_AJ	98.6768	90.61	107.9	119.1	3494963
GCA_029632965.1	NA	d__Eukaryota;p__Ascomycota;c__Saccharomycetes;o__Saccharomycetales;f__Phaffomycetaceae;g__Komagataella;s__Komagataella pastoris;z__Komagataella pastoris	99.8269	85.55	30.1	35.1	1865792
GCF_004331285.1	NA	d__Bacteria;p__Proteobacteria;c__Gammaproteobacteria;o__Pseudomonadales;f__Moraxellaceae;g__Acinetobacter;s__Acinetobacter sp004331285	98.7202	94.36	83.1	88.1	1908914
GCA_901472455.1	NA	d__Bacteria;p__Proteobacteria;c__Gammaproteobacteria;o__Enterobacterales;f__Enterobacteriaceae;g__Leclercia;s__Leclercia adecarboxylata	97.5965	76.92	15.6	20.3	533184
GCF_000817895.1	NA	d__Bacteria;p__Proteobacteria;c__Gammaproteobacteria;o__Pseudomonadales;f__Pseudomonadaceae;g__Pseudomonas_E;s__Pseudomonas_E fluorescens_AO	97.2301	52.25	5.5	10.6	218898
GCF_006874705.1	NA	d__Bacteria;p__Proteobacteria;c__Gammaproteobacteria;o__Enterobacterales;f__Enterobacteriaceae;g__Leclercia;s__Leclercia adecarboxylata_C	96.0082	65.99	9.4	14.3	313555
GCF_009646115.1	NA	d__Bacteria;p__Proteobacteria;c__Gammaproteobacteria;o__Enterobacterales;f__Enterobacteriaceae;g__Pantoea;s__Pantoea eucalypti	98.2142	56.03	8.1	14.4	260743
GCF_000412675.1	NA	d__Bacteria;p__Proteobacteria;c__Gammaproteobacteria;o__Pseudomonadales;f__Pseudomonadaceae;g__Pseudomonas_E;s__Pseudomonas_E putida	96.7533	41.23	3.9	9.4	161409
GCF_004115925.1	NA	d__Bacteria;p__Proteobacteria;c__Gammaproteobacteria;o__Enterobacterales;f__Enterobacteriaceae;g__Lelliottia;s__Lelliottia nimipressuralis	98.1146	71.35	15.2	21.4	473013
GCF_001598795.1	NA	d__Bacteria;p__Proteobacteria;c__Gammaproteobacteria;o__Burkholderiales;f__Burkholderiaceae;g__Comamonas;s__Comamonas acidovorans	98.011	52.97	5.2	9.9	235873
GCF_001517405.1	NA	d__Bacteria;p__Proteobacteria;c__Gammaproteobacteria;o__Enterobacterales;f__Enterobacteriaceae;g__Erwinia_B;s__Erwinia_B gerundensis	98.8569	61.92	14.3	23.1	431467
GCF_002736125.1	NA	d__Bacteria;p__Proteobacteria;c__Gammaproteobacteria;o__Pseudomonadales;f__Pseudomonadaceae;g__Pseudomonas_E;s__Pseudomonas_E putida_M	97.098	56.27	10.1	17.9	415173
GCF_002843585.1	NA	d__Bacteria;p__Proteobacteria;c__Gammaproteobacteria;o__Pseudomonadales;f__Pseudomonadaceae;g__Pseudomonas_E;s__Pseudomonas_E sp002843585	97.637	63.45	15.1	23.8	549907
GCF_009497655.1	NA	d__Bacteria;p__Firmicutes;c__Bacilli;o__Bacillales;f__Bacillaceae_H;g__Priestia;s__Priestia megaterium_A	98.3109	33.19	5	15	177001
GCA_002360945.1	NA	d__Bacteria;p__Proteobacteria;c__Gammaproteobacteria;o__Enterobacterales;f__Enterobacteriaceae;g__Leclercia;s__Leclercia adecarboxylata_B	95.8622	73.81	10	13.6	328382
GCF_004801935.1	NA	d__Bacteria;p__Proteobacteria;c__Gammaproteobacteria;o__Pseudomonadales;f__Pseudomonadaceae;g__Pseudomonas_E;s__Pseudomonas_E atacamensis	96.8561	52.51	4.6	8.8	192305
GCA_002365595.1	NA	d__Bacteria;p__Proteobacteria;c__Gammaproteobacteria;o__Pseudomonadales;f__Moraxellaceae;g__Acinetobacter;s__Acinetobacter sp002365595	96.7529	72.56	14.7	20.3	293723
GCF_014635545.1	NA	d__Bacteria;p__Proteobacteria;c__Gammaproteobacteria;o__Pseudomonadales;f__Moraxellaceae;g__Acinetobacter;s__Acinetobacter courvalinii	97.3035	61.78	16.4	26.6	439509
GCF_000196795.1	NA	d__Bacteria;p__Proteobacteria;c__Gammaproteobacteria;o__Pseudomonadales;f__Moraxellaceae;g__Acinetobacter;s__Acinetobacter oleivorans	97.0704	50.78	6	11.7	167723
GCF_002356095.1	NA	d__Bacteria;p__Proteobacteria;c__Gammaproteobacteria;o__Pseudomonadales;f__Pseudomonadaceae;g__Pseudomonas_E;s__Pseudomonas_E putida_H	96.4623	24.45	1.9	7.8	96853
GCF_000211415.1	NA	d__Bacteria;p__Proteobacteria;c__Gammaproteobacteria;o__Enterobacterales;f__Enterobacteriaceae;g__Enterobacter;s__Enterobacter mori	97.5566	37.4	4.4	11.8	147316
GCF_000282535.1	NA	d__Bacteria;p__Proteobacteria;c__Gammaproteobacteria;o__Pseudomonadales;f__Pseudomonadaceae;g__Pseudomonas_E;s__Pseudomonas_E sp000282535	96.0196	43.4	5.7	13.2	228345
GCF_003575975.1	NA	d__Bacteria;p__Actinobacteriota;c__Actinomycetia;o__Actinomycetales;f__Micrococcaceae;g__Galactobacter;s__Galactobacter valiniphilus	98.5044	48.75	10.1	20.7	233126
GCF_002095385.1	NA	d__Bacteria;p__Proteobacteria;c__Gammaproteobacteria;o__Enterobacterales;f__Enterobacteriaceae;g__Pantoea;s__Pantoea eucrina	98.7093	36.41	4.2	11.7	111505
GCF_016839165.1	NA	d__Bacteria;p__Proteobacteria;c__Alphaproteobacteria;o__Rhizobiales;f__Xanthobacteraceae;g__Bradyrhizobium;s__Bradyrhizobium sp003020075	98.3836	17.87	2.2	12.6	117989
GCF_000219605.1	NA	d__Bacteria;p__Proteobacteria;c__Gammaproteobacteria;o__Pseudomonadales;f__Pseudomonadaceae;g__Pseudomonas_A;s__Pseudomonas_A stutzeri	98.2262	41.58	5.1	12.3	157082
GCF_001605965.1	NA	d__Bacteria;p__Proteobacteria;c__Gammaproteobacteria;o__Pseudomonadales;f__Pseudomonadaceae;g__Pseudomonas_E;s__Pseudomonas_E koreensis_C	96.5422	41.98	3.1	7.5	133771
GCF_004367745.1	NA	d__Bacteria;p__Proteobacteria;c__Gammaproteobacteria;o__Burkholderiales;f__Burkholderiaceae;g__Herbaspirillum;s__Herbaspirillum huttiense	97.811	39.31	4.2	10.6	164141
GCF_014284195.1	NA	d__Bacteria;p__Proteobacteria;c__Gammaproteobacteria;o__Burkholderiales;f__Burkholderiaceae;g__Undibacterium;s__Undibacterium sp014284195	98.8077	39.65	5	12.5	120788
GCF_900068835.1	NA	d__Bacteria;p__Proteobacteria;c__Gammaproteobacteria;o__Enterobacterales;f__Enterobacteriaceae;g__Pantoea;s__Pantoea ludwigii_B	95.6609	45.12	4.4	9.8	157262
GCF_001883995.1	NA	d__Bacteria;p__Firmicutes;c__Bacilli;o__Bacillales;f__Bacillaceae_G;g__Bacillus_A;s__Bacillus_A paranthracis	96.9791	16.49	0.9	5.3	33231
GCF_007680145.1	NA	d__Bacteria;p__Proteobacteria;c__Gammaproteobacteria;o__Enterobacterales;f__Enterobacteriaceae;g__Pseudescherichia;s__Pseudescherichia sp002298805	96.6241	31.98	3	9.4	89184
GCF_004342285.1	NA	d__Bacteria;p__Proteobacteria;c__Gammaproteobacteria;o__Enterobacterales;f__Enterobacteriaceae;g__Klebsiella;s__Klebsiella sp004342285	98.789	20.3	2.6	12.8	98189
GCF_001023535.1	NA	d__Bacteria;p__Proteobacteria;c__Gammaproteobacteria;o__Pseudomonadales;f__Pseudomonadaceae;g__Pseudomonas_E;s__Pseudomonas_E chlororaphis_E	98.3936	21.82	3.3	15	140283
GCF_000735435.1	NA	d__Bacteria;p__Proteobacteria;c__Gammaproteobacteria;o__Enterobacterales;f__Enterobacteriaceae;g__Klebsiella;s__Klebsiella planticola	97.0701	13.65	1.1	8.2	42681
GCF_000215745.1	NA	d__Bacteria;p__Proteobacteria;c__Gammaproteobacteria;o__Enterobacterales;f__Enterobacteriaceae;g__Klebsiella;s__Klebsiella aerogenes	98.4447	18.57	2.5	13.4	88420
GCF_000759795.1	NA	d__Bacteria;p__Proteobacteria;c__Gammaproteobacteria;o__Enterobacterales;f__Enterobacteriaceae;g__Pseudescherichia;s__Pseudescherichia vulneris	96.2629	32.12	2.7	8.5	80996
GCF_000498395.2	NA	d__Bacteria;p__Proteobacteria;c__Gammaproteobacteria;o__Pseudomonadales;f__Pseudomonadaceae;g__Pseudomonas_E;s__Pseudomonas_E putida_Q	95.5308	23.33	1.5	6.5	68989
GCF_004792415.1	NA	d__Bacteria;p__Proteobacteria;c__Gammaproteobacteria;o__Enterobacterales;f__Enterobacteriaceae;g__Pantoea;s__Pantoea vagans	95.7162	28.25	2.2	7.7	70545
GCF_017348915.1	NA	d__Bacteria;p__Proteobacteria;c__Gammaproteobacteria;o__Enterobacterales;f__Enterobacteriaceae;g__UBA7405;s__UBA7405 sp000755535	97.5627	19.88	2.6	13.1	77326
GCF_001975225.1	NA	d__Bacteria;p__Proteobacteria;c__Gammaproteobacteria;o__Enterobacterales;f__Enterobacteriaceae;g__Kosakonia;s__Kosakonia cowanii	96.5917	21.62	2	9.4	66499
GCF_002858935.1	NA	d__Bacteria;p__Proteobacteria;c__Gammaproteobacteria;o__Enterobacterales;f__Enterobacteriaceae;g__Pantoea;s__Pantoea endophytica	94.8483	23.14	1.8	7.7	62018
GCF_002025705.1	NA	d__Bacteria;p__Proteobacteria;c__Gammaproteobacteria;o__Pseudomonadales;f__Pseudomonadaceae;g__Pseudomonas_E;s__Pseudomonas_E putida_J	94.5693	25.13	2.6	10.2	107842
GCF_900108875.1	NA	d__Bacteria;p__Proteobacteria;c__Gammaproteobacteria;o__Pseudomonadales;f__Pseudomonadaceae;g__Pseudomonas_E;s__Pseudomonas_E sp900108875	95.7225	23.12	3.5	15.2	146428
GCF_900105805.1	NA	d__Bacteria;p__Proteobacteria;c__Gammaproteobacteria;o__Pseudomonadales;f__Pseudomonadaceae;g__Pseudomonas_E;s__Pseudomonas_E moraviensis_A	95.6498	14.93	1	6.9	42873
GCF_001571325.1	NA	d__Bacteria;p__Proteobacteria;c__Gammaproteobacteria;o__Burkholderiales;f__Burkholderiaceae;g__Comamonas;s__Comamonas tsuruhatensis	96.8145	21.28	1.4	6.5	62322
GCA_002455755.1	NA	d__Bacteria;p__Proteobacteria;c__Gammaproteobacteria;o__Pseudomonadales;f__Moraxellaceae;g__Acinetobacter;s__Acinetobacter sp002455755	95.0242	23.31	4	17.2	83210
GCF_900068845.1	NA	d__Bacteria;p__Proteobacteria;c__Gammaproteobacteria;o__Enterobacterales;f__Enterobacteriaceae;g__Pantoea;s__Pantoea ludwigii_A	95.0414	12.91	1.2	9.1	40667
GCF_003030305.1	NA	d__Bacteria;p__Actinobacteriota;c__Actinomycetia;o__Propionibacteriales;f__Propionibacteriaceae;g__Cutibacterium;s__Cutibacterium acnes	99.0496	19.1	2.7	14.3	46025
GCF_001598475.1	NA	d__Bacteria;p__Proteobacteria;c__Gammaproteobacteria;o__Enterobacterales;f__Enterobacteriaceae;g__Pantoea;s__Pantoea agglomerans	96.5376	46.34	5	10.9	158342
GCF_001636055.1	NA	d__Bacteria;p__Proteobacteria;c__Gammaproteobacteria;o__Pseudomonadales;f__Pseudomonadaceae;g__Pseudomonas_E;s__Pseudomonas_E putida_B	95.2814	20.47	1.9	9.2	74242
GCF_011290365.1	NA	d__Bacteria;p__Proteobacteria;c__Gammaproteobacteria;o__Enterobacterales;f__Enterobacteriaceae;g__Leclercia;s__Leclercia sp003024485	94.6667	27.57	2.1	7.8	72945
GCA_900539805.1	NA	d__Bacteria;p__Proteobacteria;c__Alphaproteobacteria;o__Rhizobiales_A;f__Rhizobiaceae_A;g__Phyllobacterium;s__Phyllobacterium sp900539805	97.04	13.55	0.4	3.2	15448
GCF_001704155.1	NA	d__Bacteria;p__Proteobacteria;c__Gammaproteobacteria;o__Xanthomonadales;f__Xanthomonadaceae;g__Stenotrophomonas;s__Stenotrophomonas rhizophila_A	96.1774	15.92	2.2	13.6	62104
GCA_002480085.1	NA	d__Bacteria;p__Proteobacteria;c__Gammaproteobacteria;o__Enterobacterales;f__Enterobacteriaceae;g__Pseudescherichia;s__Pseudescherichia sp002480085	94.4772	16.92	1.2	7	33769
GCF_000708715.2	NA	d__Bacteria;p__Proteobacteria;c__Gammaproteobacteria;o__Pseudomonadales;f__Pseudomonadaceae;g__Pseudomonas_E;s__Pseudomonas_E putida_R	95.0141	15.33	0.8	5.2	34861
GCF_001515525.1	NA	d__Bacteria;p__Actinobacteriota;c__Actinomycetia;o__Actinomycetales;f__Dermatophilaceae;g__Piscicoccus;s__Piscicoccus intestinalis	95.3634	26.54	2.2	8.3	73434
GCF_000399665.1	NA	d__Bacteria;p__Proteobacteria;c__Gammaproteobacteria;o__Pseudomonadales;f__Moraxellaceae;g__Acinetobacter;s__Acinetobacter calcoaceticus_B	95.3017	16.3	1.2	7.6	32519
GCA_900092255.1	NA	d__Eukaryota;p__Evosea;c__Eumycetozoa;o__unknown;f__unknown;g__Synstelium;s__Synstelium polycarpum	95.8512	0.79	0	2.9	10422

[truncated: 2 more sheets: Species_RFC-2, Species_RFC-3]
